# Supplementary material for: Oxanorbornane-based amphiphilic systems: design, synthesis and material properties
Source: Royal Society of Chemistry journal article supplement (doi:10.1039/c2ra01198k), 2012-01-01

# Oxanorbornane-based Amphiphilic Systems: Design, Synthesis and Material Properties

M. Ganesan and K. M. Muraleedharan\*

Department of Chemistry, Indian Institute of Technology Madras, Chennai-600 036, India.

Fax: +91 44 2257 4202; Tel: +91 44 2257 4233; E-mail: [mkm@iitm.ac.in](mailto:mkm@iitm.ac.in)

---

| <b>Table of contents:</b>                                                           | <b>Page no</b> |
|-------------------------------------------------------------------------------------|----------------|
| General experimental information                                                    | 2-3            |
| Spectral data of the compounds <b>2-6</b> & <b>11-13</b>                            | 3-34           |
| FT-IR spectra of <b>6a</b> & <b>6c</b>                                              | 35             |
| <sup>1</sup> H NMR spectra of microcrystalline aggregates <b>6a</b>                 | 36             |
| SEM images of the samples prepared under various conditions                         | 37             |
| Crystallographic information of compounds <b>3c</b> & <b>12e</b>                    | 38             |
| <sup>1</sup> H & <sup>13</sup> C NMR spectra of compounds <b>2-6</b> & <b>11-13</b> | 39-80          |

### General experimental information:

Experiments which required anhydrous conditions were carried out under nitrogen atmosphere using dry solvents. Thin-layer chromatography (TLC) was performed on 0.25 mm silica gel plates (60 F<sub>254</sub> grade) from Merck, and were analyzed using a 254 nm UV light. The chromatographic separation was carried out on 100-200 mesh silica gel. Melting points were obtained on electro-thermal apparatus and are uncorrected. <sup>1</sup>H NMR and <sup>13</sup>C NMR spectra were recorded on Bruker Avance 400 MHz instrument, and the chemical shifts are reported in parts per million (ppm) relative to tetramethylsilane, with *J* values in Hertz. The splitting patterns in <sup>1</sup>H NMR spectra are reported as follows: s = singlet; d = doublet; t = triplet; q = quartet; dd = doublet of doublet; quin = quintet; ddd = doublet of doublet of doublet; m = multiplet. <sup>13</sup>C NMR data are reported with the solvent peak (CDCl<sub>3</sub> = 77.0 ppm) as the internal standard. High-resolution mass spectra (HRMS) were recorded on a Waters Q-Tof *micro*<sup>TM</sup> spectrometer with lock spray source. Infrared spectra were recorded using a Nicolet 6700 FT-IR spectrophotometer. The samples for SEM imaging were coated with Au-Pd (Gatan precision etching coating system (model No. 682) operating at 5 KeV) and analysed by FEI Quanta FEG 200 High Resolution Scanning Electron Microscope operating at 10-30 kV.

The intensity data collection during X-ray crystallographic analysis was carried out on a Bruker AXS (kappa apex II) diffractometer<sup>1</sup> equipped with graphite monochromated Mo (K<sub>α</sub>) radiation. The data were collected for  $\theta$  up to 25° for Mo (K<sub>α</sub>) radiation.  $\omega$  and  $\phi$  scans were employed to collect the data. The frame width for  $\omega$  was set to 0.5 deg for data collection. The frames were integrated and data were reduced for Lorentz and polarization correction using SAINT- Plus. The multi-scan absorption correction<sup>2</sup> was applied to the data.

---

<sup>1</sup> Bruker (2004). APEX-II and SAINT-Plus (Version 7.06a), Bruker AXS Inc., Madison, Wisconsin, USA.

<sup>2</sup> Bruker (1999). SADABS, Bruker AXS Inc., Madison, Wisconsin, USA.

All structures were solved using SIR-92 and refined using SHELXL-97<sup>3</sup>. The molecular and packing diagrams were drawn using ORTEP-3<sup>4</sup> and Mercury 1.4.2. The non-hydrogen atoms were refined with anisotropic displacement parameter. All hydrogen atoms could be located in the difference Fourier map. However, the hydrogen atoms bonded to carbons were fixed at chemically meaningful positions and were allowed to ride with parent atom during the refinement.

**((1S,2S,3R,4R)-3-(((tert-butyl dimethylsilyl)oxy)methyl)-7-oxabicyclo[2.2.1]hept-5-en-2-yl)methyl acetate (+)-4**

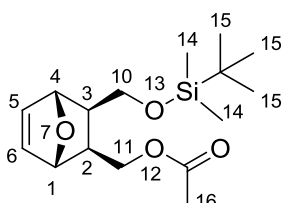

The meso diol **1** (Scheme 1, manuscript) was stereoselectively desymmetrized using *Pseudomonas Amano Lipase* (PS-Amano) through trans-acetylation with vinyl acetate using Bloch's protocol.<sup>5</sup>

To a stirred solution of the resulting monoacetylated alcohol (0.2 g, 1.01 mmol) in dry CH<sub>2</sub>Cl<sub>2</sub> (6 mL) was added imidazole (0.171 g, 2.53 mmol), DMAP (12.3 mg, 0.10 mmol), followed by TBDMSCl (0.15 g, 1.81 mmol) at 0 °C. The mixture was allowed to slowly warm to room temperature and stirred overnight. After completion of the reaction, the solvents were evaporated, the residue dissolved in EtOAc (35 mL), washed with water (65 mL), dried (Na<sub>2</sub>SO<sub>4</sub>) and concentrated under reduced pressure to get a residue which was purified by column chromatography on silica gel using 10-20% EtOAc/Hexane; [α]<sub>D</sub><sup>23</sup> +11.28 (*c* 1.0, MeOH); Gummy liquid; Yield = 98%; R<sub>f</sub> (10% EtOAc/Hexane), 0.30; <sup>1</sup>H NMR (CDCl<sub>3</sub>, 400 MHz): δ 6.32 (d, 1H, *J* = 6.4 Hz, 6-H), 6.28 (d, 1H, *J* = 6.4 Hz, 5-H), 4.78 (s, 1H, 1-H), 4.73 (s, 1H, 4-H), 4.25 (dd, 1H, *J* = 4.8, 10.6 Hz, 11-H<sub>a</sub>), 3.86 (t, 1H, *J* = 10.4 Hz, 11-H<sub>b</sub>), 3.66 (dd, 1H, *J* = 5.7, 9.8 Hz, 10-H<sub>a</sub>), 3.48 (t, 1H, *J* = 9.6 Hz, 10-H<sub>b</sub>), 2.01 (s, 3H, 16-H), 1.86-1.78 (m, 2H, 2-H, 3-H), 0.84 (s, 9H, 15-H), 0.00 (s, 6H, 14-H); <sup>13</sup>C NMR (CDCl<sub>3</sub>,

<sup>3</sup> Sheldrick, G. M. (1997). SHELX-97 and SHELXL-97. University of Göttingen, Germany.

<sup>4</sup> ORTEP-3 for windows Farrugia, L. J. *J. Appl. Crystallogr.* **1997**, *30*, 565-566.

<sup>5</sup> C. Cinquin, I. Schaper, G. Mandville, R. Bloch, *Synlett* **1995**, 339-340.

100 MHz):  $\delta$  170.9, 136.0, 135.0, 80.4, 80.3, 64.1, 62.1, 42.6, 38.9, 25.9 (3C), 21.0, 18.2, -5.4 (2C); IR (neat): 2964, 2925, 2854, 1731, 1456, 1402, 1238, 1188, 1026, 899, 775  $\text{cm}^{-1}$ ; HRMS (ESI) exact mass calcd. for  $\text{C}_{16}\text{H}_{28}\text{O}_4\text{SiNa}$  ( $\text{M}+\text{Na}$ )<sup>+</sup> 335.1655, found ( $\text{M}+\text{Na}$ )<sup>+</sup> 335.1642.

**((1S,2S,3R,4R)-3-(((tert-butyl dimethylsilyl)oxy)methyl)-7-oxabicyclo[2.2.1]hept-5-en-2-yl)methanol**

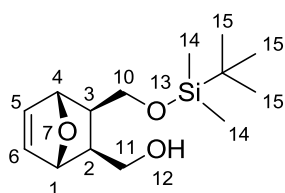

To a stirred solution of **4** (0.6 g, 1.92 mmol) in dry MeOH (7 mL) was added NaOMe (0.156 g, 2.88 mmol) at 0 °C and the reaction mixture was allowed to stir at room temperature for 3 h. After completion of the reaction, saturated brine (20 mL) was added to the mixture, extracted with ethyl acetate, dried ( $\text{Na}_2\text{SO}_4$ ) and concentrated under reduced pressure to get a crude product was directly used for the next step without purification;  $[\alpha]_{\text{D}}^{25} +7.28$  ( $c$  1.0, MeOH); Gummy liquid; Yield = 74%;  $R_f$  (40% EtOAc/Hexane), 0.31;  $^1\text{H}$  NMR ( $\text{CDCl}_3$ , 400 MHz):  $\delta$  6.32-6.25 (m, 2H, 5-H, 6-H), 4.60 (s, 1H, 4-H), 4.56 (s, 1H, 1-H), 3.80-3.64 (m, 3H, 10-H, 11-H), 3.64-3.55 (m, 1H, 11-H), 3.34 (bs, 1H, 12-H), 1.89-1.79 (m, 2H, 2-H, 3-H), 0.80 (s, 9H, 15-H), 0.00 (s, 6H, 14-H);  $^{13}\text{C}$  NMR ( $\text{CDCl}_3$ , 100 MHz):  $\delta$  136.0, 135.5, 81.4, 81.0, 63.9, 62.7, 42.9, 42.8, 25.9 (3C), 18.2, -5.4, -5.5; IR (neat): 3459, 2933, 2885, 2858, 1469, 1389, 1255, 1114, 1067, 837, 777, 689  $\text{cm}^{-1}$ ; HRMS (ESI) exact mass calcd. for  $\text{C}_{14}\text{H}_{27}\text{O}_3\text{Si}$  ( $\text{M}+\text{H}$ )<sup>+</sup> 271.1729, found ( $\text{M}+\text{H}$ )<sup>+</sup> 271.1739.

**General procedure for the preparation of ((+)-5a-e):**

To a stirred solution of the crude alcohol (1.0 eq) and  $\text{Et}_3\text{N}$  (3.0 eq) in dry dichloromethane (4 mL of  $\text{CH}_2\text{Cl}_2$  for 300 mg of starting material) was added appropriate acid chloride (1.2 eq) at 0 °C under  $\text{N}_2$  atmosphere. The reaction mixture was warmed to room temperature and allowed to stir for 45 min. After completion of the reaction, the mixture was washed with water and extracted with dichloromethane. The organic layer was

dried using sodium sulfate and evaporated under reduced pressure. The residue was purified by column chromatography on silica gel using 10-20% EtOAc/Hexane. Yields and spectroscopic details of various compounds synthesized are given below.

**((1S,2S,3R,4R)-3-(((tert-butyldimethylsilyl)oxy)methyl)-7-oxabicyclo[2.2.1]hept-5-en-2-yl)methyl palmitate ((+)-5a)**

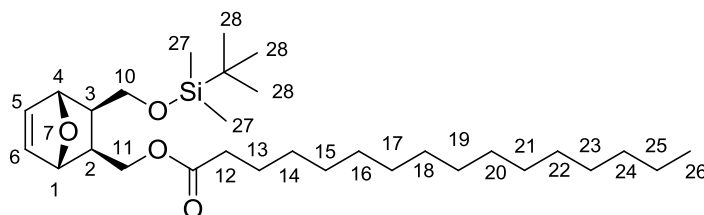

Gummy liquid; Yield = 74%;  $R_f$  (5% EtOAc/Hexane), 0.34;  $[\alpha]_D^{25} +5.56$  ( $c$  1.0, MeOH);  $^1\text{H}$  NMR ( $\text{CDCl}_3$ , 400 MHz):  $\delta$  6.32 (dd, 1H,  $J = 1.6, 6.0$  Hz, 6-**H**), 6.28 (dd, 1H,  $J = 1.2, 5.2$  Hz, 5-**H**), 4.79 (s, 1H, 1-**H**), 4.72 (s, 1H, 4-**H**), 4.24 (dd, 1H,  $J = 4.8, 10.4$  Hz, 11-**H**<sub>a</sub>), 3.87 (t, 1H,  $J = 10.4$  Hz, 11-**H**<sub>b</sub>), 3.68 (dd, 1H,  $J = 5.2, 9.6$  Hz, 10-**H**<sub>a</sub>), 3.48 (t, 1H,  $J = 9.6$  Hz, 10-**H**<sub>b</sub>), 2.26 (t, 2H,  $J = 7.6$  Hz, 12-**H**), 1.88-1.74 (m, 2H, 2-**H**, 3-**H**), 1.60-1.52 (m, 2H, 13-**H**), 1.19 (bs, 24H, 14-25-**H**), 0.84 (s, 9H, 28-**H**), 0.82 (t, 3H, 26-**H**, merged with 28-**H**), 0.00 (s, 6H, 27-**H**);  $^{13}\text{C}$  NMR ( $\text{CDCl}_3$ , 100 MHz):  $\delta$  173.7, 135.9, 135.0, 80.4, 80.3, 63.8, 62.1, 42.5, 39.0, 34.4, 31.9, 29.7 (3C), 29.67 (2C), 29.64, 29.5, 29.34, 29.26, 29.16, 25.9 (3C), 25.0, 22.7, 18.2, 14.1, -5.4 (2C); IR (neat): 2926, 2855, 1739, 1466, 1254, 1168, 1113, 1092, 839, 777, 688  $\text{cm}^{-1}$ ; HRMS (ESI) exact mass calcd. for  $\text{C}_{30}\text{H}_{57}\text{O}_4\text{Si}$  ( $\text{M}+\text{H}$ )<sup>+</sup> 509.4026, found ( $\text{M}+\text{H}$ )<sup>+</sup> 509.4009.

**((1S,2S,3R,4R)-3-(((tert-butyldimethylsilyl)oxy)methyl)-7-oxabicyclo[2.2.1]hept-5-en-2-yl)methyl tetradecanoate ((+)-5b)**

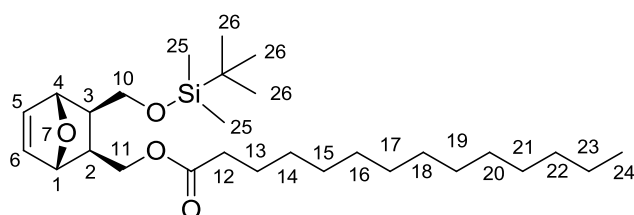

Gummy liquid; Yield = 86%;  $R_f$  (5% EtOAc/Hexane), 0.34;  $[\alpha]_D^{25} +5.77$  ( $c$  1.0, MeOH);  $^1\text{H}$  NMR ( $\text{CDCl}_3$ , 400 MHz):  $\delta$  6.32 (d, 1H,  $J = 5.6$  Hz, 6-**H**), 6.28 (d, 1H,  $J = 5.6$  Hz, 5-**H**), 4.79 (s, 1H, 1-**H**), 4.72 (s, 1H, 4-**H**), 4.24 (dd, 1H,  $J = 4.8, 10.4$  Hz, 11-**H**<sub>a</sub>), 3.87 (t, 1H,  $J = 10.4$  Hz, 11-**H**<sub>b</sub>), 3.68 (dd, 1H,  $J = 5.6, 9.6$ , 10-**H**<sub>a</sub>), 3.48 (t, 1H,  $J = 9.6$  Hz, 10-**H**<sub>b</sub>), 2.26 (t, 2H,  $J = 7.2$  Hz, 12-**H**), 1.88-1.76 (m, 2H, 2-**H**, 3-**H**), 1.58 -1.53 (m, 2H, 13-**H**), 1.26-1.19 (m, 20H, 14-23-**H**), 0.84 (s, 9H, 26-**H**), 0.82 (t, 3H, 24-**H**, merged with 26-**H**), 0.00 (s, 6H, 25-**H**);  $^{13}\text{C}$  NMR ( $\text{CDCl}_3$ , 100 MHz):  $\delta$  173.7, 135.9, 135.0, 80.4, 80.2, 63.8, 62.1, 42.5, 39.0, 34.4, 31.9, 29.62 (3C), 29.58, 29.45, 29.3, 29.25, 29.15, 25.9 (3C), 25.0, 22.7, 18.2, 14.1, -5.4 (2C); IR (neat): 2926, 2855, 1739, 1465, 1254, 1168, 1113, 1093, 837, 775  $\text{cm}^{-1}$ ; HRMS (ESI) exact mass calcd. for  $\text{C}_{28}\text{H}_{53}\text{O}_4\text{Si}$  ( $\text{M}+\text{H}$ )<sup>+</sup> 481.3713, found ( $\text{M}+\text{H}$ )<sup>+</sup> 481.3701.

**((1S,2S,3R,4R)-3-((tert-butyldimethylsilyloxy)methyl)-7-oxabicyclo[2.2.1]hept-5-en-2-yl)methyl dodecanoate ((+)-5c)**

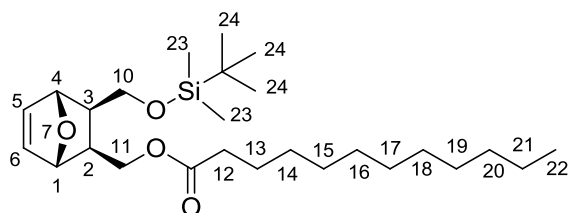

Gummy liquid; Yield = 83%;  $R_f$  (5% EtOAc/Hexane), 0.34;  $[\alpha]_D^{26} +6.12$  ( $c$  1.0, MeOH);  $^1\text{H}$  NMR ( $\text{CDCl}_3$ , 400 MHz):  $\delta$  6.32 (dd, 1H,  $J = 1.2, 5.6$  Hz, 6-**H**), 6.27 (dd, 1H,  $J = 1.6, 6.0$  Hz, 5-**H**), 4.78 (s, 1H, 1-**H**), 4.71 (s, 1H, 4-**H**), 4.23 (dd, 1H,  $J = 5.2, 10.8$  Hz, 11-**H**<sub>a</sub>), 3.87 (t, 1H,  $J = 10.0$  Hz, 11-**H**<sub>b</sub>), 3.67 (dd, 1H,  $J = 6.0, 10.0$  Hz, 10-**H**<sub>a</sub>), 3.48 (t, 1H,  $J = 9.6$  Hz, 10-**H**<sub>b</sub>), 2.25 (t, 2H,  $J = 7.2$  Hz, 12-**H**), 1.87-1.75 (m, 2H, 2-**H**, 3-**H**), 1.56 (quin, 2H,  $J = 7.2$  Hz, 13-**H**), 1.26-1.19 (m, 16H, 14-21-**H**), 0.83 (s, 9H, 24-**H**), 0.81 (t, 3H,  $J = 6.8$  Hz, 22-**H**), 0.00 (s, 6H, 23-**H**);  $^{13}\text{C}$  NMR ( $\text{CDCl}_3$ , 100 MHz):  $\delta$  173.6, 135.9, 135.0, 80.4, 80.2, 63.8, 62.1, 42.5, 38.9, 34.3, 31.9, 29.6 (2C), 29.4, 2

9.3, 29.2, 29.1, 25.9 (3C), 24.9, 22.6, 18.2, 14.1, -5.4 (2C): IR (neat): 2925, 2854, 1738, 1465, 1253, 1165, 1091, 1071, 835, 775, 687  $\text{cm}^{-1}$ ; HRMS (ESI) exact mass calcd. for  $\text{C}_{26}\text{H}_{49}\text{O}_4\text{Si}$  ( $\text{M}+\text{H}$ )<sup>+</sup> 453.3400, found ( $\text{M}+\text{H}$ )<sup>+</sup> 453.3389.

**((1S,2S,3R,4R)-3-(((tert-butyldimethylsilyl)oxy)methyl)-7-oxabicyclo[2.2.1]hept-5-en-2-yl)methyl undecanoate ((+)-5d)**

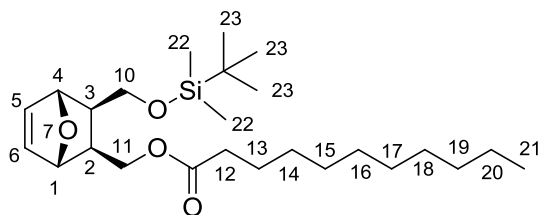

Gummy liquid; Yield = 84%;  $R_f$  (5% EtOAc/Hexane), 0.34;  $[\alpha]_D^{25} +5.12$  ( $c$  1.0, MeOH);  $^1\text{H}$  NMR ( $\text{CDCl}_3$ , 500 MHz):  $\delta$  6.37 (dd, 1H,  $J = 1.5, 6.0$  Hz, 6-**H**), 6.33 (dd, 1H,  $J = 1.5, 6.0$  Hz, 5-**H**), 4.85 (s, 1H, 1-**H**), 4.78 (s, 1H, 4-**H**), 4.30 (dd, 1H,  $J = 5.0, 10.5$  Hz, 11-**H**<sub>a</sub>), 3.93 (t, 1H,  $J = 10.5$  Hz, 11-**H**<sub>b</sub>), 3.73 (dd, 1H,  $J = 6.0, 10.0$  Hz, 10-**H**<sub>a</sub>), 3.48 (t, 1H,  $J = 9.6$  Hz, 10-**H**<sub>b</sub>), 2.31 (t, 2H,  $J = 7.5$  Hz, 12-**H**), 1.93-1.88 (m, 1H, 3-**H**), 1.87-1.82 (m, 1H, 2-**H**), 1.64-1.61 (m, 2H, 13-**H**), 1.33-1.23 (m, 14H, 14-20-**H**), 0.89 (s, 9H, 23-**H**), 0.82 (t, 3H, 21-**H**, merged with 23-**H**), 0.00 (s, 6H, 22-**H**);  $^{13}\text{C}$  NMR ( $\text{CDCl}_3$ , 125 MHz):  $\delta$  173.6, 135.9, 135.0, 80.4, 80.3, 63.8, 62.1, 42.6, 39.0, 34.4, 31.9, 29.5 (2C), 29.3 (2C), 29.2, 29.1, 25.9 (3C), 25.0, 22.7, 18.2, 14.1, -5.4 (2C): IR (neat): 2954, 2927, 2856, 1739, 1465, 1255, 1112, 1073, 912, 838, 776, 737  $\text{cm}^{-1}$ ; HRMS (ESI) exact mass calcd. for  $\text{C}_{25}\text{H}_{46}\text{O}_4\text{SiNa}$  ( $\text{M}+\text{Na}$ )<sup>+</sup> 461.3063, found ( $\text{M}+\text{Na}$ )<sup>+</sup> 461.3083.

**((1S,2S,3R,4R)-3-(((tert-butyldimethylsilyl)oxy)methyl)-7-oxabicyclo[2.2.1]hept-5-en-2-yl)methyl decanoate ((+)-5e)**

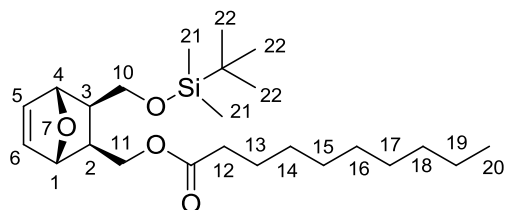

Gummy liquid; Yield = 96%;  $R_f$  (5% EtOAc/Hexane), 0.34;  $[\alpha]_D^{26} +6.33$  ( $c$  1.0, MeOH);  $^1\text{H}$  NMR ( $\text{CDCl}_3$ , 400 MHz):  $\delta$  6.39-6.33 (m, 2H, 5-**H**, 6-**H**), 4.85 (s, 1H, 1-**H**), 4.78 (s, 1H, 4-**H**), 4.30 (dd, 1H,  $J = 4.8, 10.4$  Hz, 11-**H**<sub>a</sub>), 3.93 (t, 1H,  $J = 10.4$  Hz, 11-**H**<sub>b</sub>), 3.73 (dd, 1H,  $J = 6.0, 9.6$  Hz, 10-**H**<sub>a</sub>), 3.54 (t, 1H,  $J = 9.6$  Hz, 10-**H**<sub>b</sub>), 2.32 (t, 2H,  $J = 7.2$  Hz, 12-**H**), 1.94-1.82 (m, 2H, 2-**H**, 3-**H**), 1.65-1.59 (m, 2H, 13-**H**), 1.29-1.26 (m, 12H, 14-19-**H**), 0.9 (s, 9H, 22-**H**), 0.88 (t, 3H, merged with 22-**H**, 20-**H**), 0.06 (s, 6H, 21-**H**);  $^{13}\text{C}$  NMR ( $\text{CDCl}_3$ , 100 MHz):  $\delta$  173.7, 135.9, 135.1, 80.4, 80.3, 63.8, 62.1, 42.5, 39.0, 34.4, 31.8, 29.4, 29.2 (2C), 29.1, 25.9 (3C), 25.0, 22.6, 18.2, 14.1, -5.4 (2C); IR (neat): 2931, 2861, 2403, 1728, 1522, 1425, 1216, 767, 674  $\text{cm}^{-1}$ ; HRMS (ESI) exact mass calcd. for  $\text{C}_{24}\text{H}_{45}\text{O}_4\text{Si}$  ( $\text{M}+\text{H}$ )<sup>+</sup> 425.3087, found ( $\text{M}+\text{H}$ )<sup>+</sup> 425.3079.

#### General procedure for dihydroxylation of 5a-e:

To a stirred solution containing a mixture of **5a-e** (1.0 eq), N-methyl morpholine N-Oxide (2.4 eq) and pyridine (30  $\mu\text{L}$  for 100mg of the alkene) in  $^t\text{BuOH-H}_2\text{O}$  (3:1) was added osmium tetroxide (0.02M solution in  $^t\text{BuOH}$ , 0.01 eq). The reaction mixture was heated at 80  $^\circ\text{C}$  for 5-6 h. After completion of the reaction, the mixture was cooled to room temperature, treated with 15% aq.  $\text{Na}_2\text{SO}_3$  solution (4 mL), allowed to stir for 5-10 min and water (8 mL) was added to it. All the solvents were removed under reduced pressure and the resulting residue was extracted with ethyl acetate. The organic layer was dried using sodium sulfate and evaporated under reduced pressure. The residue was purified by column chromatography on silica gel using Hexane/EtOAc in a gradient mode. Yields and spectroscopic details of various compounds synthesized are given below.

**((1R,2S,3R,4S,5R,6S)-3-(((tert-butyldimethylsilyl)oxy)methyl)-5,6-dihydroxy-7-oxabicyclo[2.2.1]heptan-2-yl)methyl palmitate**



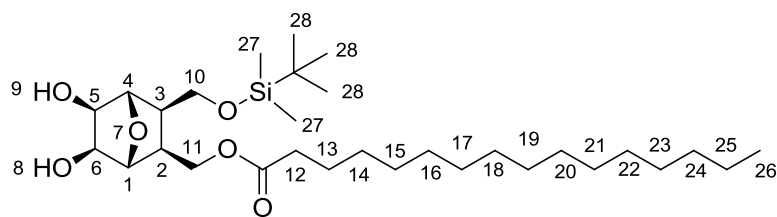

Colorless solid; Yield = 82%;  $R_f$  (40% EtOAc/Hexane), 0.36;  $[\alpha]_D^{25} +13.76$  ( $c$  1.0, MeOH);

$^1\text{H}$  NMR ( $\text{CDCl}_3$ , 400 MHz):  $\delta$  4.19 (s, 1H, 1-**H**), 4.15 (s, 1H, 4-**H**), 4.15-4.12 (m, 1H, 11-**H**<sub>a</sub>), 3.87-3.80 (m, 3H, 5-**H**, 6-**H**, 11-**H**<sub>b</sub>), 3.54 (dd, 1H,  $J = 6.0, 9.6$  Hz, 10-**H**<sub>a</sub>), 3.44 (t, 1H,  $J = 9.6$  Hz, 10-**H**<sub>b</sub>), 3.05 (bs, -OHs), 2.24 (t, 2H,  $J = 7.2$  Hz, 12-**H**), 2.00 (ddd, 1H,  $J = 5.6, 9.6, 9.6$  Hz, 3-**H**), 1.94-1.88 (m, 1H, 2-**H**), 1.61-1.51 (m, 2H, 13-**H**), 1.21 (bs, 24H, 14-25-**H**), 0.84 (s, 9H, 28-**H**), 0.83 (t, 3H, merged with 28-**H**, 26-**H**), 0.00 (s, 6H, 27-**H**);  $^{13}\text{C}$  NMR ( $\text{CDCl}_3$ , 100

MHz):  $\delta$  173.6, 84.6, 84.3, 74.3 (2C), 62.0, 60.6, 43.4, 39.9, 34.3, 31.9, 29.7 (5C), 29.6, 29.5, 29.3, 29.24, 29.16, 25.9 (3C), 24.9, 22.7, 18.2, 14.1, -5.4 (2C); IR (neat): 3404, 2926, 2855, 1739, 1466, 1171, 1090, 838, 778  $\text{cm}^{-1}$ ; HRMS (ESI) exact mass calcd. for  $\text{C}_{30}\text{H}_{59}\text{O}_6\text{Si}$  ( $\text{M}+\text{H}$ )<sup>+</sup> 543.4081, found ( $\text{M}+\text{H}$ )<sup>+</sup> 543.4097.

**((1R,2S,3R,4S,5R,6S)-3-(((tert-butyl dimethylsilyl)oxy)methyl)-5,6-dihydroxy-7-oxabicyclo[2.2.1]heptan-2-yl)methyl tetradecanoate**

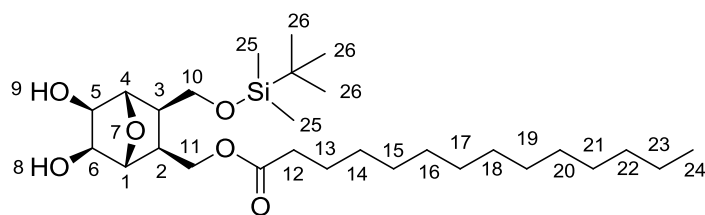

Colorless solid; Yield = 89%;  $R_f$  (40% EtOAc/Hexane), 0.36;  $[\alpha]_D^{26} +13.45$  ( $c$  1.0, MeOH);

$^1\text{H}$  NMR ( $\text{CDCl}_3$ , 400 MHz):  $\delta$  4.19 (s, 1H, 1-**H**), 4.15 (s, 1H, 4-**H**), 4.14 (dd, 1H, 11-**H**<sub>a</sub>, merged with 4-**H**), 3.87-3.80 (m, 3H, 11-**H**<sub>b</sub>, 5-**H**, 6-**H**), 3.54 (dd, 1H,  $J = 6.0, 9.6$  Hz, 10-**H**<sub>a</sub>), 3.44 (t, 1H,  $J = 9.6$  Hz, 10-**H**<sub>b</sub>), 3.36 (bs, 1H, -OH), 2.25 (t, 2H,  $J = 7.6$  Hz, 12-**H**), 2.03-1.86 (m, 2H, 3-**H**, 2-**H**), 1.82 (bs, 1H, -OH), 1.60-1.55 (m, 2H, 13-**H**), 1.21 (bs, 20H, 14-23-

**H**), 0.84 (bs, 12H, 26-**H**, 24-**H**), 0.00 (s, 6H, 25-**H**);  $^{13}\text{C}$  NMR ( $\text{CDCl}_3$ , 100 MHz):  $\delta$  173.7, 84.5, 84.3, 74.3 (2C), 61.9, 60.5, 43.4, 39.9, 34.3, 31.9, 29.62 (3C), 29.58, 29.4, 29.3, 29.2, 29.1, 25.8 (3C), 24.9, 22.7, 18.2, 14.1, -5.4 (2C); IR (neat): 3369, 2927, 2856, 1740, 1462, 1254, 1218, 1092, 1064, 839, 774  $\text{cm}^{-1}$ ; HRMS (ESI) exact mass calcd. for  $\text{C}_{28}\text{H}_{54}\text{O}_6\text{NaSi}$  ( $\text{M}+\text{Na}$ ) $^+$  537.3587, found ( $\text{M}+\text{Na}$ ) $^+$  537.3575.

**((1R,2S,3R,4S,5R,6S)-3-(((tert-butyl)dimethylsilyl)oxy)methyl)-5,6-dihydroxy-7-oxabicyclo[2.2.1]heptan-2-yl)methyl dodecanoate**

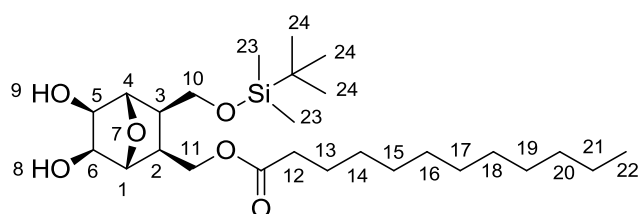

Colorless solid; Yield = 91%;  $R_f$  (40% EtOAc/Hexane), 0.36;  $[\alpha]_D^{25} +13.88$  ( $c$  1.0, MeOH);  $^1\text{H}$  NMR ( $\text{CDCl}_3$ , 400 MHz):  $\delta$  4.18 (s, 1H, 1-**H**), 4.15 (s, 1H, 4-**H**), 4.14 (dd, 1H, 11-**H**<sub>a</sub>, merged with 4-**H**), 3.85-3.80 (m, 4H, -OH, 11-**H**<sub>b</sub>, 5-**H**, 6-**H**), 3.53 (dd, 1H,  $J = 6.4, 9.6$  Hz, 10-**H**<sub>a</sub>), 3.44 (t, 1H,  $J = 9.6$  Hz, 10-**H**<sub>b</sub>), 2.24 (t, 2H,  $J = 7.6$  Hz, 12-**H**), 2.00 (ddd, 1H,  $J = 5.6, 9.6, 9.6$  Hz, 3-**H**), 1.94-1.88 (m, 1H, 2-**H**), 1.56 (quin, 2H,  $J = 7.2$  Hz, 13-**H**), 1.23 (bs, 16H, 14-21-**H**), 0.84 (bs, 12H, 24-**H**, 22-**H**), 0.00 (s, 6H, 23-**H**); -OH proton did not appear;  $^{13}\text{C}$  NMR ( $\text{CDCl}_3$ , 100 MHz):  $\delta$  173.6, 84.5, 84.2, 74.3 (2C), 61.9, 60.6, 43.3, 39.8, 34.2, 31.8, 29.5 (2C), 29.4, 29.25, 29.17, 29.09, 25.8 (3C), 24.9, 22.6, 18.1, 14.0, -5.5 (2C); IR (neat): 3409, 2927, 2856, 1739, 1465, 1395, 1254, 1172, 1088, 1065, 839, 778  $\text{cm}^{-1}$ ; HRMS (ESI) exact mass calcd. for  $\text{C}_{26}\text{H}_{51}\text{O}_6\text{Si}$  ( $\text{M}+\text{H}$ ) $^+$  487.3455, found ( $\text{M}+\text{H}$ ) $^+$  487.3465.

**((1R,2S,3R,4S,5R,6S)-3-(((tert-butyl)dimethylsilyl)oxy)methyl)-5,6-dihydroxy-7-oxabicyclo[2.2.1]heptan-2-yl)methyl undecanoate**

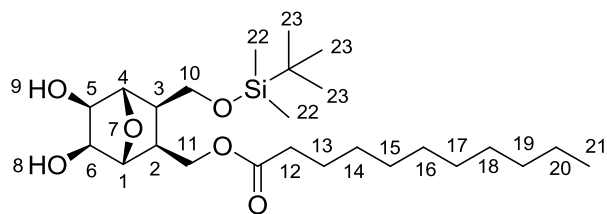

Colorless solid; Yield = 73%;  $R_f$  (40% EtOAc/Hexane), 0.36;  $[\alpha]_D^{26} +11.41$  ( $c$  1.0, MeOH);

$^1\text{H}$  NMR ( $\text{CDCl}_3$ , 400 MHz):  $\delta$  4.19 (s, 1H, 1-**H**), 4.15 (s, 1H, 4-**H**), 4.15-4.12 (m, 1H, 11-**H**<sub>a</sub>), 3.87-3.80 (m, 3H, 5-**H**, 6-**H**, 11-**H**<sub>b</sub>), 3.54 (dd, 1H,  $J = 6.0, 9.6$  Hz, 10-**H**<sub>a</sub>), 3.44 (t, 1H,  $J = 9.6$  Hz, 10-**H**<sub>b</sub>), 3.08 (bs, 2H, OHs), 2.24 (t, 2H,  $J = 7.2$  Hz, 12-**H**), 2.00 (ddd, 1H,  $J = 5.6, 9.6, 9.6$  Hz, 3-**H**), 1.94-1.88 (m, 1H, 2-**H**), 1.61-1.51 (m, 2H, 13-**H**), 1.21 (bs, 14H, 14-20-**H**), 0.84 (s, 9H, 23-**H**), 0.83 (t, 3H, merged with 23-**H**, 21-**H**), 0.00 (s, 6H, 22-**H**);  $^{13}\text{C}$  NMR ( $\text{CDCl}_3$ ,

125

MHz):  $\delta$  173.6, 84.6, 84.3, 74.3 (2C), 62.0, 60.5, 43.4, 39.9, 34.3, 31.9, 29.5, 29.4, 29.3, 29.2, 29.15, 25.9 (3C), 24.9, 22.7, 18.2, 14.1, -5.4 (2C); IR (neat): 3401, 2954, 2927, 2856, 1737, 1466, 1255, 1167, 1134, 1093, 1063, 838, 759  $\text{cm}^{-1}$ ; HRMS (ESI) exact mass calcd. for  $\text{C}_{25}\text{H}_{48}\text{O}_6\text{SiNa}$  ( $\text{M}+\text{Na}$ )<sup>+</sup> 495.3118, found ( $\text{M}+\text{Na}$ )<sup>+</sup> 495.3137.

**((1R,2S,3R,4S,5R,6S)-3-(((tert-butyl dimethylsilyl)oxy)methyl)-5,6-dihydroxy-7-oxabicyclo[2.2.1]heptan-2-yl)methyl decanoate**

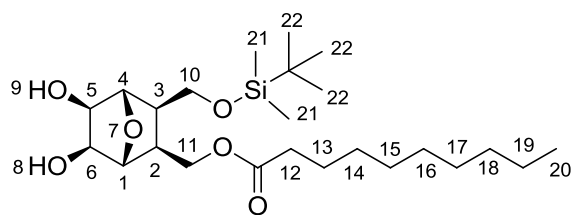

Colorless solid; Yield = 93%;  $R_f$  (40% EtOAc/Hexane), 0.36;  $[\alpha]_D^{23} +13.37$  ( $c$  1.0, MeOH);

$^1\text{H}$  NMR ( $\text{CDCl}_3$ , 400 MHz):  $\delta$  4.23 (s, 1H, 1-**H**), 4.19 (s, 1H, 4-**H**), 4.18 (dd, 1H, merged with 4-**H**, 11-**H**<sub>a</sub>), 3.91-3.84 (m, 3H, 5-**H**, 6-**H**, 11-**H**<sub>b</sub>), 3.59 (dd, 1H,  $J = 6.4, 9.6$  Hz, 10-**H**<sub>a</sub>), 3.49 (t, 1H,  $J = 9.2$  Hz, 10-**H**<sub>b</sub>), 3.13 (bs, 2H, -OH), 2.29 (t, 2H,  $J = 7.2$  Hz, 12-**H**), 2.05 (ddd, 1H,  $J = 5.6, 9.6, 9.6$  Hz, 3-**H**), 1.96 (ddd, 1H,  $J = 6.0, 8.8, 8.8$  Hz, 2-**H**), 1.61 (quin,

2H,  $J = 7.2$  Hz, 13-**H**), 1.29-1.26 (m, 12H, 14-19-**H**), 0.88 (bs, 12H, 22-**H**, 20-**H**), 0.04 (s, 6H, 21-**H**);  $^{13}\text{C}$  NMR ( $\text{CDCl}_3$ , 100 MHz):  $\delta$  173.6, 84.6, 84.3, 74.3 (2C), 62.0, 60.6, 43.4, 39.9, 34.3, 31.8, 29.4 (2C), 29.2, 29.1, 25.9 (3C), 24.9, 22.6, 18.2, 14.1, -5.4 (2C); IR (neat): 3426, 2929, 2857, 1739, 1467, 1254, 1062, 838, 778  $\text{cm}^{-1}$ ; HRMS (ESI) exact mass calcd. for  $\text{C}_{24}\text{H}_{47}\text{O}_6\text{Si}$  ( $\text{M}+\text{H}$ ) $^+$  459.3142, found ( $\text{M}+\text{H}$ ) $^+$  459.3148.

### General procedure for deprotection of TBDMS group from the above intermediates

To a stirred solution of the above silyl protected precursors (1.0 eq) in THF (6 mL) was added  $n\text{-Bu}_4\text{NF}$  (2.0 eq) and allowed to stir at room temperature for 3 h. After completion of the reaction, the mixture was concentrated *in vacuo* and the residue was purified by column chromatography on silica gel using ethyl acetate-MeOH system in a gradient mode. Yields and spectroscopic details of various compounds synthesized are given below.

### ((1R,2S,3R,4S,5R,6S)-5,6-dihydroxy-3-(hydroxymethyl)-7-oxabicyclo[2.2.1]heptan-2-yl)methyl palmitate ((+)-6a)

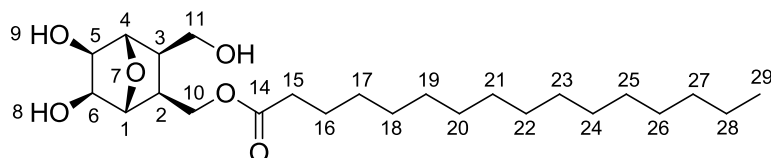

Colorless solid; Yield = 90%;  $R_f$  (EtOAc), 0.36;  $[\alpha]_D^{27} +8.68$  ( $c$  1.0,  $\text{CHCl}_3$ );  $^1\text{H}$  NMR ( $\text{CDCl}_3$ , 400 MHz):  $\delta$  4.30 (s, 1H, 4-**H**), 4.22 (s, 1H, 1-**H**), 4.20 (dd, 1H, 10-**H**<sub>a</sub>, merged with 1-**H**), 3.97 (t, 1H,  $J = 10.4$  Hz, 10-**H**<sub>b</sub>), 3.95-3.92 (m, 2H, 5-**H**, 6-**H**), 3.71 (dd, 1H,  $J = 6.4$ , 10.0 Hz, 11-**H**<sub>a</sub>), 3.60 (t, 1H,  $J = 9.6$  Hz, 11-**H**<sub>b</sub>), 2.70 (bs, 1H, -**OH**), 2.63 (bs, 1H, -**OH**), 2.30 (t, 2H,  $J = 7.6$  Hz, 15-**H**), 2.08 (ddd, 1H,  $J = 6.0, 9.2, 9.2$  Hz, 2-**H**), 2.05-1.99 (m, 1H, 3-**H**), 1.73 (bs, 1H, -**OH**), 1.65-1.58 (m, 2H, 16-**H**), 1.26 (bs, 24H, 17-28-**H**), 0.88 (t, 3H,  $J = 6.4$  Hz, 29-**H**);  $^{13}\text{C}$  NMR ( $\text{CDCl}_3$ , 100 MHz):  $\delta$  173.7, 84.9, 84.6, 74.4, 74.2, 62.4, 60.4, 43.3, 40.3, 34.4, 31.9, 29.7 (6C), 29.5, 29.3, 29.3, 2

9.2, 25.0, 22.7, 13.9; IR (neat): 3394, 2919, 2851, 1732, 1467, 1264, 1177, 1127, 1074, 968, 915, 748  $\text{cm}^{-1}$ ; HRMS (ESI) exact mass calcd. for  $\text{C}_{24}\text{H}_{45}\text{O}_6$  ( $\text{M}+\text{H}$ )<sup>+</sup> 429.3216, found ( $\text{M}+\text{H}$ )<sup>+</sup> 429.3206.

**((1R,2S,3R,4S,5R,6S)-5,6-dihydroxy-3-(hydroxymethyl)-7-oxabicyclo[2.2.1]heptan-2-yl)methyl tetradecanoate ((+)-6b)**

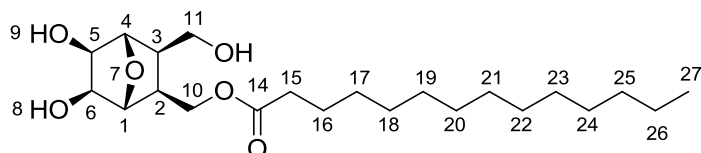

Colorless solid; Yield = 96%;  $R_f$  (EtOAc), 0.36;  $[\alpha]_D^{27} +8.56$  ( $c$  1.0,  $\text{CHCl}_3$ );  $^1\text{H}$  NMR ( $\text{CDCl}_3$ , 400 MHz):  $\delta$  4.31 (s, 1H, 4-H), 4.22 (s, 1H, 1-H), 4.19 (dd, 1H,  $J = 6.0, 11.2$  Hz, 10-H<sub>a</sub>), 3.99-3.93 (m, 3H, 10-H<sub>b</sub>, 5-H, 6-H), 3.72 (dd, 1H,  $J = 6.0, 10.0$  Hz, 11-H<sub>a</sub>), 3.60 (t, 1H,  $J = 8.8$  Hz, 11-H<sub>b</sub>), 2.81 (bs, 1H, -OH), 2.30 (t, 2H,  $J = 7.6$  Hz, 15-H), 2.15-2.09 (m, 1H, 2-H), 2.05-2.02 (m, 1H, 3-H), 1.69 (bs, 2H, -OH), 1.62-1.61 (m, 2H, 16-H), 1.26 (bs, 20H, 17-26-H), 0.88 (t, 3H,  $J = 6.8$  Hz, 27-H);  $^{13}\text{C}$  NMR ( $\text{CDCl}_3$ , 100 MHz):  $\delta$  173.9, 84.6, 84.4, 74.1, 73.9, 62.2, 59.8, 42.8, 39.8, 34.2, 31.9, 29.6 (4C), 29.5, 29.3 4, 29.29, 29.17, 24.9, 22.7, 14.1; IR (neat): 3391, 2919, 2853, 1731, 1408, 1051, 1015, 908, 710, 632  $\text{cm}^{-1}$ ; HRMS (ESI) exact mass calcd. for  $\text{C}_{22}\text{H}_{40}\text{O}_6\text{Na}$  ( $\text{M}+\text{Na}$ )<sup>+</sup> 423.2723, found ( $\text{M}+\text{Na}$ )<sup>+</sup> 423.2711.

**((1R,2S,3R,4S,5R,6S)-5,6-dihydroxy-3-(hydroxymethyl)-7-oxabicyclo[2.2.1]heptan-2-yl)methyl dodecanoate ((+)-6c)**

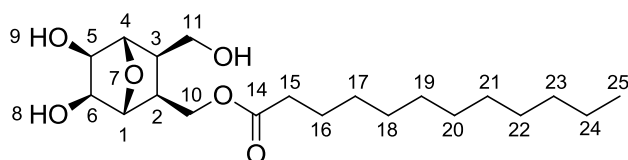

Colorless solid; Yield = 93%;  $R_f$  (10% MeOH/EtOAc), 0.58;  $[\alpha]_D^{27} +8.39$  ( $c$  1.0,  $\text{CHCl}_3$ );  $^1\text{H}$  NMR ( $\text{CDCl}_3$ , 400 MHz):  $\delta$  4.34 (s, 1H, 4-H), 4.20 (s, 1H, 1-H), 4.12 (dd, 1H,  $J = 5.6, 10.8$

Hz, 10-**H<sub>a</sub>**), 4.00-3.87 (m, 4H, -**OH**, 5-**H**, 6-**H**, 10-**H<sub>b</sub>**), 3.67 (dd, 2H,  $J = 5.2, 10.4$  Hz, -**OH**, 11-**H<sub>a</sub>**), 3.54 (t, 1H,  $J = 9.6$  Hz, 11-**H<sub>b</sub>**), 2.92 (bs, 1H, -**OH**), 2.30 (t, 2H,  $J = 7.2$  Hz, 15-**H**), 2.10 (ddd, 1H,  $J = 6.4, 9.2, 9.2$  Hz, 2-**H**), 2.04-1.98 (m, 1H, 3-**H**), 1.61 (quin, 2H,  $J = 6.8$  Hz, 16-**H**), 1.40-1.20 (bs, 16H, 17-24-**H**), 0.88 (t, 3H,  $J = 6.4$  Hz, 25-**H**);  $^{13}\text{C}$  NMR ( $\text{CDCl}_3$ , 100 MHz):  $\delta$  173.8, 84.7, 84.4, 74.2, 74.0, 62.2, 60.1, 42.9, 39.9, 34.3, 31.9, 29.6 (2C), 29.5, 29.3 0, 29.25, 29.15, 24.9, 22.7, 14.1; IR (neat): 3411, 2919, 2850, 1714, 1458, 1297, 1176, 1048, 959, 911, 827, 654, 529  $\text{cm}^{-1}$ ; HRMS (ESI) exact mass calcd. for  $\text{C}_{20}\text{H}_{36}\text{O}_6\text{Na}$  ( $\text{M}+\text{Na}$ ) $^+$  395.2410, found ( $\text{M}+\text{Na}$ ) $^+$  395.2419.

**((1R,2S,3R,4S,5R,6S)-5,6-dihydroxy-3-(hydroxymethyl)-7-oxabicyclo[2.2.1]heptan-2-yl)methyl undecanoate ((+)-6d)**

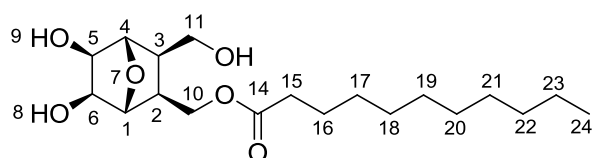

Colorless solid; Yield = 83%;  $R_f$  (10% MeOH/EtOAc), 0.58;  $[\alpha]_D^{27} +7.74$  ( $c$  1.0,  $\text{CHCl}_3$ );  $^1\text{H}$  NMR ( $\text{CDCl}_3$ , 500 MHz):  $\delta$  4.34 (s, 1H, 4-**H**), 4.19 (s, 1H, 1-**H**), 4.13-4.09 (m, 1H, 10-**H<sub>a</sub>**), 3.96-3.94 (m, 3H, 5-**H**, 6-**H**, 10-**H<sub>b</sub>**), 3.82 (bs, 1H, -**OH**), 3.72 (dd, 1H,  $J = 5.0, 10.5$  Hz, 11-**H<sub>a</sub>**), 3.59 (t, 1H,  $J = 9.5$  Hz, 11-**H<sub>b</sub>**), 3.19 (bs, 1H, -**OH**), 2.30 (t, 2H,  $J = 7.5$  Hz, 15-**H**), 2.11-2.08 (m, 1H, 2-**H**), 2.02 (ddd, 1H,  $J = 5.5, 9.5, 9.5$  Hz, 3-**H**), 1.60 (qn, 2H,  $J = 7.0$  Hz, 16-**H**), 1.33-1.26 (m, 14H, 17-23-**H**), 0.88 (t, 3H,  $J = 7.0$  Hz, 24-**H**) one -OH proton exchanged;  $^{13}\text{C}$  NMR ( $\text{CDCl}_3$ , 125 MHz):  $\delta$  173.9, 84.6, 84.4, 74.2, 74.0, 62.1, 59.9, 42.9, 39.9, 34.3, 31.9, 29.54, 29.46, 29.28, 29.24, 29.1, 24.9, 22.7, 14.1; IR (neat): 3366, 2921, 2854, 1719, 1465, 1407, 1177, 1017, 963  $\text{cm}^{-1}$ ; HRMS (ESI) exact mass calcd. for  $\text{C}_{19}\text{H}_{34}\text{O}_6\text{Na}$  ( $\text{M}+\text{Na}$ ) $^+$  381.2253, found ( $\text{M}+\text{Na}$ ) $^+$  381.2258.

**((1R,2S,3R,4S,5R,6S)-5,6-dihydroxy-3-(hydroxymethyl)-7-oxabicyclo[2.2.1]heptan-2-yl)methyl decanoate ((+)-6e)**

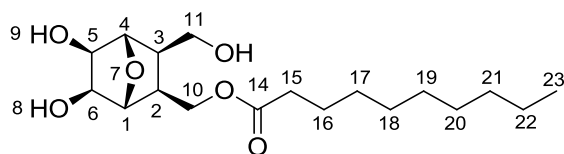

Colorless solid; Yield = 93%;  $R_f$  (10% MeOH/EtOAc), 0.58;  $[\alpha]_D^{27} +8.99$  ( $c$  1.0,  $\text{CHCl}_3$ );  $^1\text{H}$  NMR ( $\text{CDCl}_3$ , 400 MHz):  $\delta$  4.30 (s, 1H, 4-H), 4.22 (s, 1H, 1-H), 4.18 (dd, 1H,  $J = 6.0, 11.2$  Hz, 10-H<sub>a</sub>), 4.00-3.90 (m, 3H, 5-H, 6-H, 10-H<sub>b</sub>), 3.72 (dd, 1H,  $J = 6.0, 10.0$  Hz, 11-H<sub>a</sub>), 3.59 (t, 1H,  $J = 8.8$  Hz, 11-H<sub>b</sub>), 2.82 (d, 1H,  $J = 5.2$  Hz, -OH), 2.78 (bs, 1H, -OH), 2.30 (t, 2H,  $J = 7.6$  Hz, 15-H), 2.11 (ddd, 1H,  $J = 5.6, 8.8, 8.8$  Hz, 2-H), 2.02 (ddd, 1H,  $J = 6.0, 8.4, 8.4$  Hz, 3-H), 1.83 (bs, 1H, -OH), 1.65-1.59 (bs, 2H, 16-H, merged with water peak), 1.35-1.21 (m, 12H, 17-22-H), 0.88 (t, 3H,  $J = 6.8$  Hz, 23-H);  $^{13}\text{C}$  NMR ( $\text{CDCl}_3$ , 100 MHz):  $\delta$  173.9, 84.7, 84.4, 74.2, 74.0, 62.2, 59.9, 42.9, 39.9, 34.3, 31.8, 29.4 (2C), 29.2, 29.1, 24.9, 22.6, 14.1; IR (neat): 3472, 2954, 2920, 2850, 1714, 1459, 1214, 1177, 1128, 1048, 825, 725, 652, 504  $\text{cm}^{-1}$ ; HRMS (ESI) exact mass calcd. for  $\text{C}_{18}\text{H}_{32}\text{O}_6\text{Na}$  ( $\text{M}+\text{Na}$ )<sup>+</sup> 367.2097, found ( $\text{M}+\text{Na}$ )<sup>+</sup> 367.2100.

**General procedure for the preparation of (±)-2a-e:**

To a stirred solution of **1** (1.0 eq; Scheme 1, manuscript) and  $\text{Et}_3\text{N}$  (1.2 eq) in dry dichloromethane was added the appropriate acid chloride (1.0 eq) at 0 °C under  $\text{N}_2$  atmosphere. The reaction mixture was warmed to room temperature and allowed to stir for 45mins. After completion of the reaction, the mixture was washed with water and extracted with dichloromethane. The organic layer was dried using sodium sulfate and evaporated under reduced pressure. The residue was purified by column chromatography on silica gel using 10-20% EtOAc/Hexane in a gradient mode. Yields and spectroscopic details of various compounds synthesized are given below.

**(3-(hydroxymethyl)-7-oxabicyclo[2.2.1]hept-5-en-2-yl)methyl palmitate ((±)-2a)**

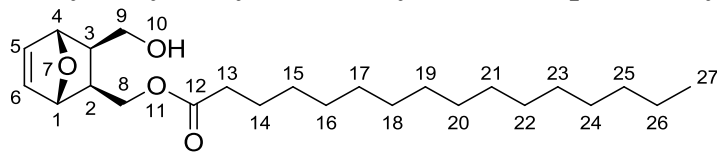

Colorless solid; Yield = 31%;  $R_f$  (50% EtOAc/Hexane), 0.40;  $^1\text{H}$  NMR ( $\text{CDCl}_3$ , 400 MHz):  $\delta$  6.44-6.38 (m, 2H, 5-H, 6-H), 4.90 (s, 1H, 4-H), 4.80 (s, 1H, 1-H), 4.31 (dd, 1H,  $J = 5.6, 10.8$  Hz, 8-H<sub>a</sub>), 4.04 (t, 1H,  $J = 9.6$  Hz, 8-H<sub>b</sub>), 3.84 (dd, 1H,  $J = 5.6, 10.4$  Hz, 9-H<sub>a</sub>), 3.66 (t, 1H,  $J = 8.8$  Hz, 9-H<sub>b</sub>), 2.33 (t, 2H,  $J = 7.6$  Hz, 13-H), 2.05 (bs, 1H, -OH), 2.00-1.88 (m, 2H, 2-H, 3-H), 1.63 (quin, 2H,  $J = 6.8$  Hz, 14-H), 1.28-1.21 (bs, 24H, 15-26-H), 0.88 (t, 3H,  $J = 6.8$  Hz, 27-H);  $^{13}\text{C}$  NMR ( $\text{CDCl}_3$ , 100 MHz):  $\delta$  173.7, 135.7, 135.4, 80.6, 80.5, 63.9, 61.9, 42.0, 39.2, 34.3, 31.9, 29.6 (6C), 29.4, 29.3, 29.2, 29.1, 24.9, 22.7, 14.1; IR (neat): 2920, 2853, 1728, 1465, 1162, 1106, 1024, 891, 848, 694, 575  $\text{cm}^{-1}$ ; HRMS (ESI) exact mass calcd. for  $\text{C}_{24}\text{H}_{42}\text{O}_4\text{Na}$  ( $\text{M}+\text{Na}$ )<sup>+</sup> 417.2981 found ( $\text{M}+\text{Na}$ )<sup>+</sup> 417. 2990.

**(3-(hydroxymethyl)-7-oxabicyclo[2.2.1]hept-5-en-2-yl)methyl dodecanoate ((±)-2b)**

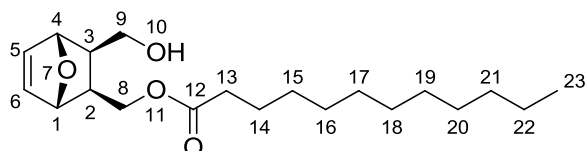

Colorless solid; Yield = 28%;  $R_f$  (40% EtOAc/Hexane), 0.40;  $^1\text{H}$  NMR ( $\text{CDCl}_3$ , 400 MHz):  $\delta$  6.42-6.38 (m, 2H, 5-H, 6-H), 4.90 (s, 1H, 4-H), 4.80 (s, 1H, 1-H), 4.31 (dd, 1H,  $J = 5.2, 10.8$  Hz, 8-H<sub>a</sub>), 4.04 (t, 1H,  $J = 9.6$  Hz, 8-H<sub>b</sub>), 3.84 (dd, 1H,  $J = 5.6, 10.4$  Hz, 9-H<sub>a</sub>), 3.66 (t, 1H,  $J = 8.4$  Hz, 9-H<sub>b</sub>), 2.33 (t, 2H,  $J = 7.6$  Hz, 13-H), 2.00-1.89 (m, 2H, 2-H, 3-H), 1.65-1.54 (m, 2H, 14-H), 1.35-1.26 (bs, 16H, 15-22-H), 0.88 (t, 3H,  $J = 6.8$  Hz, 24-H); -OH proton did not appear;  $^{13}\text{C}$  NMR ( $\text{CDCl}_3$ , 100 MHz):  $\delta$  173.7, 135.7, 135.4, 80.6, 80.5, 63.9, 61.9, 42.0, 39.3, 34.3, 31.9, 29.6 (2C), 29.4, 29.3, 29.2, 29.1, 24.9, 22.6, 14.1; IR (neat): 3446, 2922, 2853, 1734, 1466, 1168, 1108, 1022,



899, 689, 628  $\text{cm}^{-1}$ ; HRMS (ESI) exact mass calcd. for  $\text{C}_{20}\text{H}_{34}\text{O}_4\text{Na}$  ( $\text{M}+\text{Na}$ )<sup>+</sup> 361.2355, found ( $\text{M}+\text{Na}$ )<sup>+</sup> 361.2347.

**(3-(hydroxymethyl)-7-oxabicyclo[2.2.1]hept-5-en-2-yl)methyl decanoate ((±)-2c)**

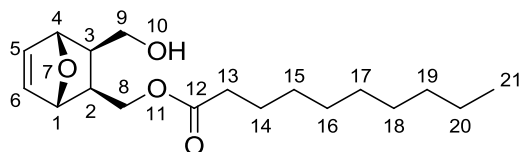

Colorless solid; Yield = 31%;  $R_f$  (50% EtOAc/Hexane), 0.40;  $^1\text{H}$  NMR ( $\text{CDCl}_3$ , 400 MHz):  $\delta$  6.40-6.36 (m, 2H, 5-**H**, 6-**H**), 4.90 (s, 1H, 4-**H**), 4.79 (s, 1H, 1-**H**), 4.31 (dd, 1H,  $J = 5.2, 10.4$  Hz, 8-**H<sub>a</sub>**), 4.04 (t, 1H,  $J = 9.6$  Hz, 8-**H<sub>b</sub>**), 3.84 (dd, 1H,  $J = 5.6, 10.4$  Hz, 9-**H<sub>a</sub>**), 3.65 (t, 1H,  $J = 8.4$  Hz, 9-**H<sub>b</sub>**), 2.32 (t, 2H,  $J = 7.6$  Hz, 13-**H**), 2.00-1.88 (m, 2H, 2-**H**, 3-**H**), 1.63 (quin, 2H,  $J = 7.2$  Hz, 14-**H**), 1.35-1.21 (bs, 12H, 15-20-**H**), 0.88 (t, 3H,  $J = 6.8$  Hz, 21-**H**); -OH proton did not appear;  $^{13}\text{C}$  NMR ( $\text{CDCl}_3$ , 100 MHz):  $\delta$  173.7, 135.7, 135.4, 80.6, 80.5, 63.9, 61.9, 42.0, 39.3, 34.3, 31.8, 29.4, 29.2 (2C), 29.1, 24.9, 22.6, 14.1; IR (neat): 3445, 2924, 2854, 1734, 1466, 1311, 1164, 1107, 1025, 898, 688, 627  $\text{cm}^{-1}$ ; HRMS (ESI) exact mass calcd. for  $\text{C}_{18}\text{H}_{30}\text{O}_4\text{Na}$  ( $\text{M}+\text{Na}$ )<sup>+</sup> 333.2042, found ( $\text{M}+\text{Na}$ )<sup>+</sup> 333.2037.

**(3-(hydroxymethyl)-7-oxabicyclo[2.2.1]hept-5-en-2-yl)methyl heptanoate ((±)-2d)**

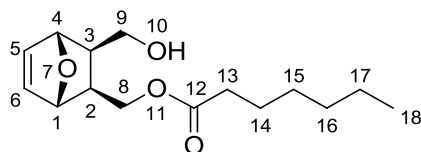

Gummy liquid; Yield = 39%;  $R_f$  (50% EtOAc/Hexane), 0.36;  $^1\text{H}$  NMR ( $\text{CDCl}_3$ , 400 MHz):  $\delta$  6.40 (dd, 1H,  $J = 1.2, 5.6$  Hz, 6-**H**), 6.37 (dd, 1H,  $J = 1.6, 6.0$  Hz, 5-**H**), 4.90 (s, 1H, 4-**H**), 4.80 (s, 1H, 1-**H**), 4.31 (dd, 1H,  $J = 5.6, 10.8$  Hz, 8-**H<sub>a</sub>**), 4.03 (t, 1H,  $J = 10.0$  Hz, 8-**H<sub>b</sub>**), 3.84 (dd, 1H,  $J = 5.6, 10.4$  Hz, 9-**H<sub>a</sub>**), 3.66 (dd, 1H,  $J = 8.4, 10.0$  Hz, 9-**H<sub>b</sub>**), 2.33 (t, 2H,  $J = 7.6$  Hz, 13-**H**), 2.01-1.88 (m, 2H, 2-**H**, 3-**H**), 1.63 (quin, 2H,  $J = 7.2$  Hz, 14-**H**), 1.40-1.26 (m, 6H, 15-17-**H**), 0.89 (t, 3H,  $J = 6.8$  Hz, 18-**H**); -OH proton did not appear;  $^{13}\text{C}$  NMR

(CDCl<sub>3</sub>, 100 MHz):

δ 173.7, 135.7, 135.3, 80.55, 80.46, 63.9, 61.8, 41.9, 39.2, 34.3, 31.4, 28.8, 24.9, 22.4, 13.9:

IR (neat): 3429, 2930, 2858, 1733, 1467, 1105, 1025, 972, 897, 689, 628 cm<sup>-1</sup>; HRMS (ESI)

exact mass calcd. for C<sub>15</sub>H<sub>24</sub>O<sub>4</sub>Na (M+Na)<sup>+</sup> 291.1572, found (M+Na)<sup>+</sup> 291.1563.

**(3-(hydroxymethyl)-7-oxabicyclo [2.2.1]hept-5-en-2-yl)methyl pentanoate ((±)-2e)**

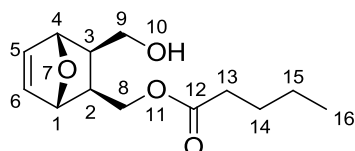

Gummy liquid; Yield = 38%; R<sub>f</sub> (20% EtOAc/Hexane), 0.43; <sup>1</sup>H NMR (CDCl<sub>3</sub>, 400

MHz): δ 6.46-6.36 (m, 2H, 5-**H**, 6-**H**), 4.90 (s, 1H, 4-**H**), 4.80 (s, 1H, 1-**H**), 4.31 (dd, 1H, J =

5.6, 10.8 Hz, 8-**H**<sub>a</sub>), 4.04 (t, 1H, J = 10.0 Hz, 8-**H**<sub>b</sub>), 3.84 (dd, 1H, J = 5.6, 10.4 Hz, 9-**H**<sub>a</sub>),

3.66 (t, 1H, J = 8.4 Hz, 9-**H**<sub>b</sub>), 2.34 (t, 2H, J = 7.6 Hz, 13-**H**), 2.01-1.88 (m, 2H, 2-**H**, 3-**H**),

1.79 (bs, 1H, 10-**H**), 1.62 (quin, 2H, J = 7.2 Hz, 14-**H**), 1.35 (sext, 2H, J = 7.2 Hz, 15-**H**),

0.93 (t, 3H, J = 7.6 Hz, 16-**H**); <sup>13</sup>C NMR (CDCl<sub>3</sub>, 100

MHz): δ 173.7, 135.7, 135.4, 80.6, 80.5, 63.9, 61.8, 42.0, 39.2, 34.0, 27.0, 22.2, 13.7: IR

(neat): 3446, 2958, 2934, 2873, 1731, 1466, 1311, 1259, 1171, 1107, 1024, 897, 689, 628 cm<sup>-1</sup>

<sup>1</sup>; HRMS (ESI) exact mass calcd. for C<sub>13</sub>H<sub>20</sub>O<sub>4</sub>Na (M+Na)<sup>+</sup> 263.1259, found (M+Na)<sup>+</sup>

263.1263.

**Preparation of Compounds (±)-3a-e**

To a stirred solution containing a mixture of **2a-e** (1.0 eq), N-methyl morpholine N-Oxide

(2.4 eq) and pyridine (30 uL for 100 mg of the alkene) in <sup>t</sup>BuOH-H<sub>2</sub>O (3:1) was added

osmium tetroxide (0.02M solution in <sup>t</sup>BuOH, 0.01 eq). The reaction mixture was heated at

80 °C for 5-6 h. After completion of the reaction, the mixture was cooled to room

temperature, treated with 15% aq. Na<sub>2</sub>SO<sub>3</sub> solution (4 mL), allowed to stir for 5-10 min and

water (8 mL) was added to it. All the solvents were then removed under reduced pressure and

the residue was extracted with ethyl acetate. The organic layer was dried using sodium sulfate, the solvent evaporated under reduced pressure and the residue was purified by column chromatography on silica gel using EtOAc-Hexane-MeOH solvent system in a gradient mode. Yields and spectroscopic details of various compounds synthesized are given below.

Since the compounds ( $\pm$ )-**3a**, **3b** and **3c** respectively are racemic forms of (+)-**6a**, **6b** & **6d**, they showed the same spectral data. The yields of these compounds through the racemic route (Scheme 1, manuscript) are: **3a** (87%), **3b** (74%) and **3c** (75%). The spectral data of the remaining compounds **3d** and **3e** are given below.

**(5,6-dihydroxy-3-(hydroxymethyl)-7-oxabicyclo[2.2.1]heptan-2-yl)methyl heptanoate**  
**( $\pm$ )-3d**

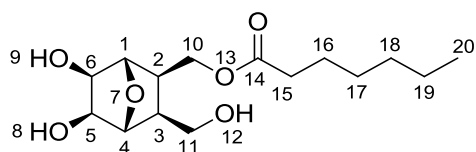

Colorless solid; Yield = 69%;  $R_f$  (10% MeOH/EtOAc), 0.52;  $^1\text{H}$  NMR ( $\text{CDCl}_3$ , 400 MHz):  $\delta$  4.35 (s, 1H, 4-H), 4.19 (s, 1H, 1-H), 4.09 (dd, 1H,  $J = 6.8, 12.0$  Hz, 10-H<sub>a</sub>), 3.95-3.89 (m, 3H, 5-H, 6-H, 10-H<sub>b</sub>), 3.65 (dd, 1H,  $J = 5.2, 10.4$ , 11-H<sub>a</sub>), 3.49 (t, 1H,  $J = 10.0$  Hz, 11-H<sub>b</sub>), 2.31 (t, 2H,  $J = 7.2$  Hz, 15-H), 2.13-1.98 (m, 2H, 2-H, 3-H), 1.61 (quin, 2H,  $J = 6.8$  Hz, 16-H), 1.27 (bs, 6H, 17-19-H), 0.89 (t, 3H,  $J = 6.4$  Hz, 20-H); Three -OH protons did not appear;

$^{13}\text{C}$  NMR ( $\text{CDCl}_3$ , 100 MHz):  $\delta$  173.9, 84.6, 84.3, 74.2, 73.9, 62.1, 59.8, 42.9, 39.8, 34.2, 31.4, 28.7, 24.8, 22.4, 13.9;

IR (neat): 3386, 2929, 2858, 1731, 1457, 1233, 1168, 1121, 1063, 1027, 912, 820, 785, 640  $\text{cm}^{-1}$ ; HRMS (ESI) exact mass calcd. for  $\text{C}_{15}\text{H}_{26}\text{O}_6\text{Na}$  ( $\text{M}+\text{Na}$ )<sup>+</sup> 325.1627, found ( $\text{M}+\text{Na}$ )<sup>+</sup> 325.1627.

**(5,6-dihydroxy-3-(hydroxymethyl)-7-oxabicyclo[2.2.1]heptan-2-yl)methyl pentanoate**  
**(±)-3e**

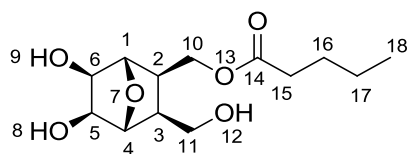

Colorless solid; Yield = 75%;  $R_f$  (10% MeOH/EtOAc), 0.52;  $^1\text{H}$  NMR ( $\text{CDCl}_3$ , 400 MHz):  $\delta$  4.57 (bs, 1H, -OH), 4.35 (s, 1H, 4-H), 4.19 (s, 2H, -OH, 1-H), 4.08 (dd, 1H,  $J = 5.6$ , 10.8 Hz, 10-H<sub>a</sub>), 4.00-3.90 (m, 3H, 5-H, 6-H, 10-H<sub>b</sub>), 3.65 (dd, 1H,  $J = 5.2$ , 10.8 Hz, 11-H<sub>a</sub>), 3.49 (t, 1H,  $J = 10.0$  Hz, 11-H<sub>b</sub>), 2.32 (t, 2H,  $J = 7.2$  Hz, 15-H), 2.14-1.98 (m, 2H, 2-H, 3-H), 1.59 (quin, 2H,  $J = 7.6$  Hz, 16-H), 1.34 (sext, 2H,  $J = 7.2$  Hz, 17-H), 0.92 (t, 3H,  $J = 7.2$  Hz, 18-H); one -OH proton did not appear;  $^{13}\text{C}$  NMR ( $\text{CDCl}_3$ , 100 MHz):  $\delta$  173.9, 84.6, 84.3, 74.2, 73.9, 62.1, 59.8, 42.9, 39.8, 33.9, 26.9, 22.2, 13.6; IR (neat): 3446, 2956, 2930, 2858, 1735, 1262, 1170, 1032, 764, 750, 698  $\text{cm}^{-1}$ ; HRMS (ESI) exact mass calcd. for  $\text{C}_{13}\text{H}_{22}\text{O}_6\text{Na}$  ( $\text{M}+\text{Na}$ )<sup>+</sup> 297.1314, found ( $\text{M}+\text{Na}$ )<sup>+</sup> 297.1305.

**General procedure for the preparation of compounds (±)-11a-f:**

To a stirred solution of the alcohol **10** (1.0 eq) and  $\text{Et}_3\text{N}$  (3.0 eq) in dry dichloromethane was added the appropriate acid chloride (2.2 eq) at 0 °C under  $\text{N}_2$  atmosphere. The reaction mixture was warmed to room temperature and allowed to stir for 45mins. After completion of the reaction, the mixture was washed with water and extracted with dichloromethane. The organic layer was dried using sodium sulfate and evaporated under reduced pressure. The residue was purified by column chromatography on silica gel using 10-20% EtOAc/Hexane. Yields and spectroscopic details of various compounds synthesized are given below.

**(1-((benzyloxy)methyl)-7-oxabicyclo[2.2.1]hept-5-ene-2,3-diyl)bis(methylene)**  
**ditetradecanoate ((±)-11a)**

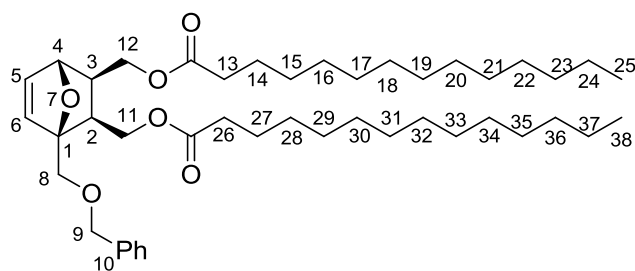

Colorless solid; Yield = 49%;  $R_f$  (20% EtOAc/Hexane), 0.50;  $^1\text{H}$  NMR ( $\text{CDCl}_3$ , 400 MHz):  $\delta$  7.36-7.28 (m, 5H, 10-**H**), 6.41-6.36 (m, 2H, 5-**H**, 6-**H**), 4.82 (d, 1H,  $J = 1.2$  Hz, 4-**H**), 4.69 (d, 1H,  $J = 12.4$  Hz, 9-**H}\_a**), 4.55 (d, 1H,  $J = 12.4$  Hz, 9-**H}\_b**), 4.42-4.37 (m, 1H, 11-**H}\_a**), 4.17 (dd, 1H,  $J = 7.2, 11.2$  Hz, 12-**H}\_a**), 4.12 (dd, 1H,  $J = 6.4, 11.2$  Hz, 12-**H}\_b**), 4.00-3.94 (m, 1H, 11-**H}\_b**), 3.92 (d, 1H  $J = 10.8$  Hz, 8-**H}\_a**), 3.75 (d, 1H,  $J = 10.8$  Hz, 8-**H}\_b**), 2.33 (t, 2H,  $J = 7.6$  Hz, 26-**H**), 2.24 (t, 2H,  $J = 7.2$  Hz, 13-**H**), 2.14-2.06 (m, 2H, 2-**H**, 3-**H**), 1.64-1.55 (m, 4H, 14-**H**, 27-**H**), 1.26 (bs, 40H, 15-24-**H**, 28-37-**H**), 0.88 (t, 6H,  $J = 6.4$  Hz, 25-**H**, 38-**H**);  $^{13}\text{C}$  NMR ( $\text{CDCl}_3$ , 100 Hz):  $\delta$  173.6, 173.4, 137.8, 137.3, 135.5, 128.4 (2), 127.9, 127.8 (2), 89.9, 80.4, 73.7, 67.7, 63.6, 62.0, 41.3, 40.7, 34.3, 31.9 (2C), 29.6 (9C), 29.5 (2C), 29.34 (2C), 29.25 (2C), 29.1 (2C), 24.9, 24.8, 22.7 (2C), 14.1 (2C); IR (neat): 2958, 2932, 2872, 1733, 1454, 1255, 1167, 1092, 736, 697  $\text{cm}^{-1}$ ; HRMS (ESI) exact mass calcd. for  $\text{C}_{44}\text{H}_{72}\text{O}_6\text{Na}$  ( $\text{M}+\text{Na}$ ) $^+$  719.5227, found ( $\text{M}+\text{Na}$ ) $^+$  719.5203.

**(1-(benzyloxymethyl)-7-oxabicyclo[2.2.1]hept-5-ene-2,3-diyl)bis(methylene) didodecanoate ((±)-11b)**

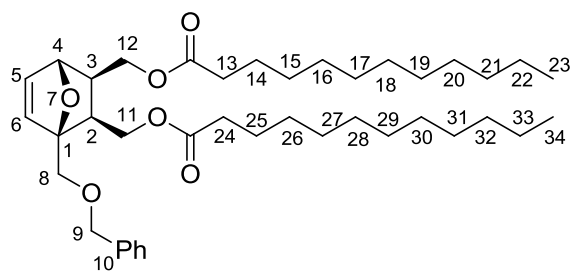

Colorless solid; Yield = 61%;  $R_f$  (20% EtOAc/Hexane), 0.50;  $^1\text{H}$  NMR ( $\text{CDCl}_3$ , 400 MHz):  $\delta$  7.35-7.27 (m, 5H, 10-**H**), 6.40-6.36 (m, 2H, 5-**H**, 6-**H**), 4.82 (s, 1H, 4-**H**), 4.69 (d,

1H,  $J = 12.0$  Hz, 9-**H<sub>a</sub>**), 4.55 (d, 1H,  $J = 12.0$  Hz, 9-**H<sub>b</sub>**), 4.41-4.37 (m, 1H, 11-**H<sub>a</sub>**), 4.20-4.08 (m, 1H, 12-**H<sub>a</sub>**), 4.13-4.08 (m, 1H, 12-**H<sub>b</sub>**), 3.98 (t, 1H,  $J = 10.0$  Hz, 11-**H<sub>b</sub>**), 3.92 (d, 1H  $J = 10.8$  Hz, 8-**H<sub>a</sub>**), 3.75 (d, 1H,  $J = 10.8$  Hz, 8-**H<sub>b</sub>**), 2.33 (t, 2H,  $J = 7.2$  Hz, 24-**H**), 2.24 (t, 2H,  $J = 7.6$  Hz, 13-**H**), 2.15-2.07 (m, 2H, 2-**H**, 3-**H**), 1.68-1.54 (m, 4H, 14-**H**, 25-**H**), 1.26 (bs, 32H, 15-22-**H**, 26-33-**H**), 0.88 (t, 6H,  $J = 6.4$  Hz, 23-**H**, 34-**H**);  $^{13}\text{C}$  NMR ( $\text{CDCl}_3$ , 100 Hz):  $\delta$  173.5, 173.3, 137.8, 137.4, 135.5, 128.4 (2C), 128.1, 127.7 (2), 89.9, 80.4, 73.7, 67.7, 63.6, 61.9, 41.3, 40.7, 36.6, 34.3, 31.9 (2C), 29.6 (4C), 29.4 (2C), 29.3 (2C), 29.2 (2C), 29.1 (2C), 24.9, 24.8, 22.6 (2C), 14.1 (2C); IR (neat): 2925, 2857, 1737, 1713, 1460, 1168, 1111, 731  $\text{cm}^{-1}$ ; HRMS (ESI) exact mass calcd. for  $\text{C}_{40}\text{H}_{65}\text{O}_6$  ( $\text{M}+\text{H}$ ) $^+$  641.4781, found ( $\text{M}+\text{H}$ ) $^+$  641.4794.

**(1-(benzyloxymethyl)-7-oxabicyclo[2.2.1]hept-5-ene-2,3-diyl)bis(methylene)**

**bis(decanoate) ((±)-11c)**

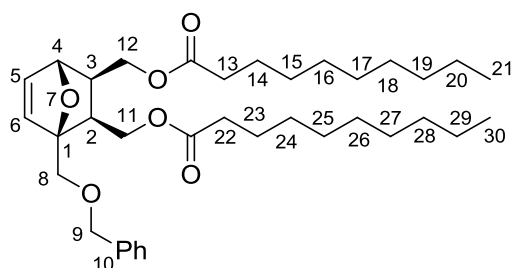

Colorless solid; Yield = 92%;  $R_f$  (20% EtOAc/Hexane), 0.50;  $^1\text{H}$  NMR ( $\text{CDCl}_3$ , 400 MHz):  $\delta$  7.35-7.27 (m, 5H, 10-**H**), 6.40-6.36 (m, 2H, 5-**H**, 6-**H**), 4.82 (s, 1H, 4-**H**), 4.69 (d, 1H,  $J = 12.0$  Hz, 9-**H<sub>a</sub>**), 4.55 (d, 1H,  $J = 12.0$  Hz, 9-**H<sub>b</sub>**), 4.39 (dd, 1H,  $J = 4.0, 10.4$  Hz, 11-**H<sub>a</sub>**), 4.18 (dd, 1H,  $J = 6.8, 11.2$  Hz, 12-**H<sub>a</sub>**), 4.11 (dd, 1H,  $J = 6.4, 11.6$  Hz, 12-**H<sub>b</sub>**), 3.98 (t, 1H,  $J = 10.4$  Hz, 11-**H<sub>b</sub>**), 3.92 (d, 1H,  $J = 10.8$  Hz, 8-**H<sub>a</sub>**), 3.75 (d, 1H,  $J = 10.8$  Hz, 8-**H<sub>b</sub>**), 2.33 (t, 2H,  $J = 7.2$  Hz, 22-**H**), 2.24 (t, 2H,  $J = 7.6$  Hz, 13-**H**), 2.13-2.08 (m, 2H, 2-**H**, 3-**H**), 1.66-1.54 (m, 4H, 14-**H**, 23-**H**), 1.26 (bs, 24H, 15-20-**H**, 24-29-**H**), 0.88 (t, 6H,  $J = 6.4$  Hz, 21-**H**, 30-**H**);  $^{13}\text{C}$  NMR ( $\text{CDCl}_3$ , 100 Hz):  $\delta$  173.6, 173.4, 137.8, 137.4, 135.5, 128.4 (2C), 127.9 (2C), 127.8, 89.9, 80.4, 73.7, 67.8, 63.

6, 61.9, 41.4, 40.7, 34.3 (2C), 31.8 (2C), 29.4 (2C), 29.2 (3C), 29.1 (2C), 25.0, 24.8, 24.7, 22.6 (2C), 14.1 (2C): IR (neat): 2927, 2861, 1731, 1516, 1458, 1368, 1170, 988, 714  $\text{cm}^{-1}$ ; HRMS (ESI) exact mass calcd. for  $\text{C}_{36}\text{H}_{56}\text{O}_6\text{Na}$  ( $\text{M}+\text{Na}$ )<sup>+</sup> 607.3975, found ( $\text{M}+\text{Na}$ )<sup>+</sup> 607.3984.

**(1-(benzyloxymethyl)-7-oxabicyclo[2.2.1]hept-5-ene-2,3-diyl)bis(methylene) dioctanoate ((±)-11d)**

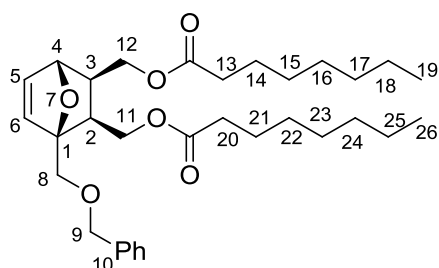

Gummy liquid; Yield = 78%;  $R_f$  (20% EtOAc/Hexane), 0.46;  $^1\text{H}$  NMR ( $\text{CDCl}_3$ , 400 MHz):  $\delta$  7.35-7.28 (m, 5H, 10-**H**), 6.40-6.36 (m, 2H, 5-**H**, 6-**H**), 4.82 (s, 1H, 4-**H**), 4.69 (d, 1H,  $J = 12.0$  Hz, 9-**H}\_a**), 4.55 (d, 1H,  $J = 12.4$  Hz, 9-**H}\_b**), 4.39 (dd, 1H,  $J = 4.0, 10.4$  Hz, 11-**H}\_a**), 4.18 (dd, 1H,  $J = 7.2, 11.6$  Hz, 12-**H}\_a**), 4.13-4.08 (m, 1H, 12-**H}\_b**), 3.98 (t, 1H,  $J = 10.4, 11-**H}_b**$ ), 3.92 (d, 1H,  $J = 10.8$  Hz, 8-**H}\_a**), 3.75 (d, 1H,  $J = 10.8$  Hz, 8-**H}\_b**), 2.33 (t, 2H,  $J = 7.6$  Hz, 20-**H**), 2.24 (t, 2H,  $J = 7.6$  Hz, 13-**H**), 2.13-2.08 (m, 2H, 2-**H**, 3-**H**), 1.66-1.55 (m, 4H, 14-**H**, 21-**H**), 1.30-1.27 (m, 16H, 15-18-**H**, 22-25-**H**), 0.88 (t, 6H,  $J = 6.4$  Hz, 19-**H**, 26-**H**);  $^{13}\text{C}$  NMR ( $\text{CDCl}_3$ , 100 Hz):  $\delta$  173.6, 173.3, 137.8, 137.4, 135.5, 128.4 (2C), 127.8 (2C), 127.7, 89.9, 80.4, 73.7, 67.7, 63.6, 61.9, 41.3, 40.7, 34.3 (2C), 31.6 (2C), 29.1 (2C), 28.9 (2C), 24.9, 24.8, 22.6 (2C), 14.0 (2C): IR (neat): 2928, 2861, 1731, 1459, 1277, 1168, 1109, 1026, 713  $\text{cm}^{-1}$ ; HRMS (ESI) exact mass calcd. for  $\text{C}_{32}\text{H}_{48}\text{O}_6\text{Na}$  ( $\text{M}+\text{Na}$ )<sup>+</sup> 551.3349, found ( $\text{M}+\text{Na}$ )<sup>+</sup> 551.3345.

**(1-(benzyloxymethyl)-7-oxabicyclo[2.2.1]hept-5-ene-2,3-diyl)bis(methylene) dihexanoate ((±)-11e)**

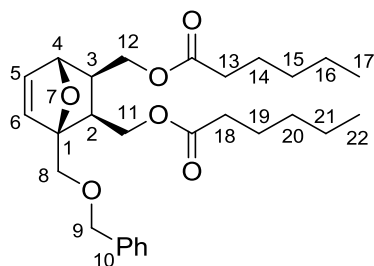

Gummy liquid; Yield = 85%;  $R_f$  (20% EtOAc/Hexane), 0.46;  $^1\text{H}$  NMR ( $\text{CDCl}_3$ , 400 MHz):  $\delta$  7.35-7.27 (m, 5H, 10-**H**), 6.40-6.36 (m, 2H, 5-**H**, 6-**H**), 4.82 (s, 1H, 4-**H**), 4.70 (d, 1H,  $J = 12.0$  Hz, 9-**H**<sub>a</sub>), 4.55 (d, 1H,  $J = 12.4$  Hz, 9-**H**<sub>b</sub>), 4.39 (dd, 1H,  $J = 4.0, 10.8$  Hz, 11-**H**<sub>a</sub>), 4.19 (dd, 1H,  $J = 6.8, 11.2$  Hz, 12-**H**<sub>a</sub>), 4.11 (dd, 1H,  $J = 6.0, 11.2$  Hz, 12-**H**<sub>b</sub>), 4.01-3.96 (m, 1H, 11-**H**<sub>b</sub>), 3.92 (d, 1H,  $J = 10.8$  Hz, 8-**H**<sub>a</sub>), 3.75 (d, 1H,  $J = 10.8$  Hz, 8-**H**<sub>b</sub>), 2.33 (t, 2H,  $J = 7.6$  Hz, 18-**H**), 2.24 (t, 2H,  $J = 7.6$  Hz, 13-**H**), 2.13-2.09 (m, 2H, 2-**H**, 3-**H**), 1.67-1.55 (m, 4H, 14-**H**, 19-**H**), 1.34-1.26 (m, 8H, 15-**H**, 16-**H**, 20-**H**, 21-**H**), 0.92-0.87 (m, 6H, 17-**H**, 22-**H**);  $^{13}\text{C}$  NMR ( $\text{CDCl}_3$ , 100 Hz):  $\delta$  173.6, 173.4, 137.8, 137.4, 135.5, 128.4, 127.8, 127.7, 89.9, 80.4, 73.7, 67.7, 63.6, 61.9, 41.3, 40.7, 34.25, 34.21, 33.9, 31.22, 31.16, 24.6, 24.5, 24.3, 22.2 (2C), 13.8 (2C); IR (neat): 2930, 2864, 1732, 1459, 1171, 1107, 1031, 709  $\text{cm}^{-1}$ ; HRMS (ESI) exact mass calcd. for  $\text{C}_{28}\text{H}_{41}\text{O}_6$  ( $\text{M}+\text{H}$ )<sup>+</sup> 473.2903, found ( $\text{M}+\text{H}$ )<sup>+</sup> 473.2896.

**(1-(benzyloxymethyl)-7-oxabicyclo[2.2.1]hept-5-ene-2,3-diyl)bis(methylene) dipentanoate ((±)-11f)**

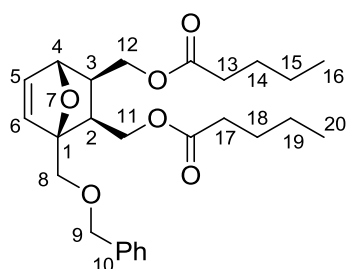

Gummy liquid; Yield = 89%;  $R_f$  (20% EtOAc/Hexane), 0.46;  $^1\text{H}$  NMR ( $\text{CDCl}_3$ , 400 MHz):  $\delta$  7.36-7.28 (m, 5H, 10-**H**), 6.40-6.36 (m, 2H, 5-**H**, 6-**H**), 4.82 (d, 1H,  $J = 1.20$  Hz, 4-**H**), 4.69 (d, 1H,  $J = 12.4$  Hz, 9-**H**<sub>a</sub>), 4.56 (d, 1H,  $J = 12.4$  Hz, 9-**H**<sub>b</sub>), 4.41-4.38 (m, 1H, 11-**H**);



**H<sub>a</sub>**), 4.18 (dd, 1H,  $J = 7.2, 11.2$  Hz, 12-**H<sub>a</sub>**), 4.11 (dd, 1H,  $J = 6.4, 11.2$  Hz, 12-**H<sub>b</sub>**), 4.00-3.95 (m, 1H, 11-**H<sub>b</sub>**), 3.92 (d, 1H,  $J = 10.8$  Hz, 8-**H<sub>a</sub>**), 3.75 (d, 1H,  $J = 10.8$  Hz, 8-**H<sub>b</sub>**), 2.34 (t, 2H,  $J = 7.6$  Hz, 17-**H**), 2.25 (t, 2H,  $J = 7.6$  Hz, 13-**H**), 2.14-2.07 (m, 2H, 2-**H**, 3-**H**), 1.66-1.53 (m, 4H, 14-**H**, 18-**H**), 1.40-1.26 (m, 4H, 15-**H**, 19-**H**), 0.94-0.88 (m, 6H, 16-**H**, 20-**H**); <sup>13</sup>C NMR (CDCl<sub>3</sub>, 100 Hz): δ 173.6, 173.4, 137.9, 137.4, 135.6, 128.5 (2C), 127.9 (2C), 127.8, 89.9, 80.5, 73.8, 67.8, 63.7, 62.0, 41.4, 40.8, 34.1, 34.0, 27.1, 26.9, 22.3 (2C), 13.7 (2C); IR (neat): 2955, 2928, 2858, 1735, 1455, 1362, 1237, 1162, 1099, 984, 735 cm<sup>-1</sup>; HRMS (ESI) exact mass calcd. for C<sub>26</sub>H<sub>36</sub>O<sub>6</sub>Na (M+Na)<sup>+</sup> 467.2410, found (M+Na)<sup>+</sup> 467.2387.

#### **General procedure for the dihydroxylation of (±)-**11a-g**:**

To a stirred solution containing a mixture of the alkene ((±)-**11a-g**; 1.0 eq), N-Methyl morpholine N-Oxide (2.4 eq) and pyridine (30 uL for 100 mg of alkene) in <sup>t</sup>BuOH-H<sub>2</sub>O (3:1) was added osmium tetroxide (0.01eq, 0.02M solution) and it was heated at 80 °C for 5-6 h. After completion of the reaction, the mixture was cooled to room temperature, treated with 15% aq. Na<sub>2</sub>SO<sub>3</sub> solution (4 mL), stirred for 5-10 minutes and water (8 mL) was added to it. All the volatiles were removed under reduced pressure and the resulting residue was extracted with ethyl acetate. The organic layer was dried using sodium sulfate and evaporated under reduced pressure. The residue was purified by column chromatography on silica gel using Hexane-EtOAc solvent system. Yields and spectroscopic details of various compounds synthesized are given below.

**(1-(benzyloxymethyl)-5,6-dihydroxy-7-oxabicyclo[2.2.1]heptane-2,3-diyl)bis(methylene) ditetradecanoate ((±)-**12a**)**

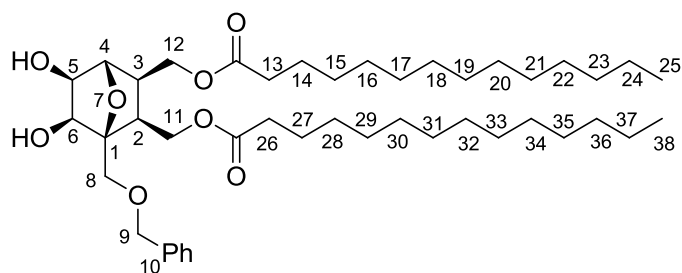

Colorless solid; Yield = 71%;  $R_f$  (40% EtOAc-Hexane), 0.34;  $^1\text{H}$  NMR ( $\text{CDCl}_3$ , 400 MHz):  $\delta$  7.39-7.30 (m, 5H, 10-H), 4.66 (d, 1H,  $J = 11.6$  Hz, 9-H<sub>a</sub>), 4.58 (d, 1H,  $J = 12.0$  Hz, 9-H<sub>b</sub>), 4.26 (s, 1H, 4-H), 4.25 (dd, 1H, 11-H<sub>a</sub>, merged with 4-H), 4.18 (dd, 1H,  $J = 6.8, 11.6$  Hz, 12-H<sub>a</sub>), 4.05-4.00 (m, 2H, -OH, 12-H<sub>b</sub>), 3.97 (m, 1H, 11-H<sub>b</sub>), 3.92 (s, 2H, 5-H, 6-H), 3.94-3.88 (m, 2H, 8-H), 3.35 (d, 1H,  $J = 5.6$  Hz, -OH), 2.30 (t, 2H,  $J = 7.6$  Hz, 26-H), 2.25 (t, 2H,  $J = 7.6$  Hz, 13-H), 2.23-2.17 (m, 1H, 3-H), 2.14-2.08 (m, 1H, 2-H), 1.63-1.55 (m, 4H, 14-H, 27-H, merged with water peak), 1.26 (bs, 40H, 15-24-H, 28-37-H), 0.88 (t, 6H,  $J = 6.4$  Hz, 25-H, 38-H);  $^{13}\text{C}$  NMR ( $\text{CDCl}_3$ , 100 MHz):  $\delta$  173.5, 173.2, 136.9, 128.6 (2C), 128.1, 127.9 (2C), 86.7, 84.1, 75.6, 74.2, 73.9, 66.7, 61.9, 60.7, 41.9, 40.9, 34.2 (2C), 31.9 (2C), 29.60 (4C), 29.57 (2C), 29.50 (2C), 29.43 (2C), 29.3 (2C), 29.2 (2C), 29.1 (2C), 24.9, 24.8, 22.6 (2C), 14.1 (2C); IR (neat): 3434, 2923, 2856, 1731, 1461, 1361, 1247, 1163, 1113, 736  $\text{cm}^{-1}$ . HRMS (ESI) exact mass calcd. for  $\text{C}_{44}\text{H}_{74}\text{O}_8\text{Na}$  ( $\text{M}+\text{Na}$ )<sup>+</sup> 753.5281, found ( $\text{M}+\text{Na}$ )<sup>+</sup> 753.5288.

**(1-(benzyloxymethyl)-5,6-dihydroxy-7-oxabicyclo[2.2.1]heptane-2,3-diyl)bis(methylene) didodecanoate ((±)-12b)**

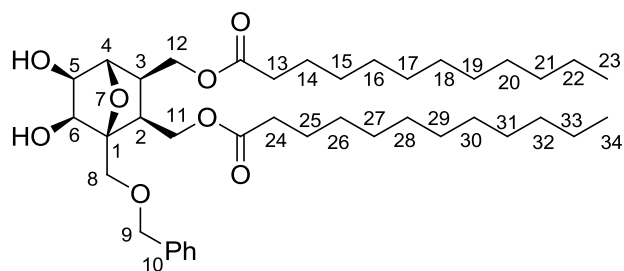

Colorless solid; Yield = 73%;  $R_f$  (40% EtOAc/Hexane), 0.34;  $^1\text{H}$  NMR ( $\text{CDCl}_3$ , 400 MHz):  $\delta$  7.40-7.32 (m, 5H, 10-**H**), 4.67 (d, 1H,  $J = 11.6$  Hz, 9-**H<sub>a</sub>**), 4.57 (d, 1H,  $J = 11.6$  Hz, 9-**H<sub>b</sub>**), 4.26 (s, 1H, 4-**H**), 4.24 (dd, 1H, 11-**H<sub>a</sub>**, merged with 4-**H**), 4.17 (dd, 1H,  $J = 7.2, 11.6$  Hz, 12-**H<sub>a</sub>**), 4.09 (d, 1H,  $J = 4.8$  Hz, -**OH**), 4.03-4.00 (m, 1H, 11-**H<sub>b</sub>**), 3.99-3.96 (m, 1H, 12-**H<sub>b</sub>**), 3.93-3.92 (m, 2H, 5-**H**, 6-**H**), 3.91-3.87 (m, 2H, 8-**H**), 3.32 (d, 1H,  $J = 5.6$  Hz, -**OH**), 2.30 (t, 2H,  $J = 7.2$  Hz, 24-**H**), 2.25 (t, 2H,  $J = 7.6$  Hz, 13-**H**), 2.22-2.17 (m, 1H, 3-**H**), 2.15-2.09 (m, 1H, 2-**H**), 1.65-1.55 (bs, 4H, 14-**H**, 25-**H**, merged with water peak), 1.26 (bs, 32H, 15-22-**H**, 26-33-**H**), 0.88 (t, 6H,  $J = 6.4$  Hz, 23-**H**, 34-**H**);  $^{13}\text{C}$  NMR ( $\text{CDCl}_3$ , 100 MHz):  $\delta$  173.6, 173.3, 136.9, 128.6 (2C), 128.2, 128.0 (2C), 86.6, 84.1, 75.8, 74.3, 73.9, 66.9, 61.9, 60.6, 42.1, 40.9, 34.3 (2C), 31.9 (2C), 29.6 (4C), 29.5 (2C), 29.3 (2C), 29.2 (2C), 29.1 (2C), 24.9, 24.8, 22.7 (2C), 14.1 (2C); IR (neat): 3441, 3387, 2956, 2921, 2851, 1735, 1725, 1469, 1367, 1249, 1169, 1111, 1074, 1012, 742  $\text{cm}^{-1}$ . HRMS (ESI) exact mass calcd. for  $\text{C}_{40}\text{H}_{67}\text{O}_8$  ( $\text{M}+\text{H}$ ) $^+$  675.4836, found ( $\text{M}+\text{H}$ ) $^+$  675.4852.

**(1-(benzyloxymethyl)-5,6-dihydroxy-7-oxabicyclo[2.2.1]heptane-2,3-diyl)bis(methylene)bis(decanoate) ((±)-12c)**

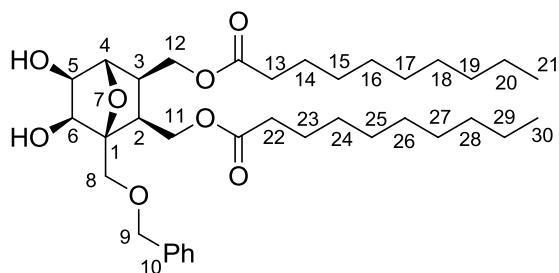

Colorless solid; Yield = 76%;  $R_f$  (40% EtOAc/Hexane), 0.35; NMR ( $\text{CDCl}_3$ , 400 MHz):  $\delta$  7.39-7.32 (m, 5H, 10-**H**), 4.65 (d, 1H,  $J = 11.6$  Hz, 9-**H<sub>a</sub>**), 4.57 (d, 1H,  $J = 11.6$  Hz, 9-**H<sub>b</sub>**), 4.26 (s, 1H, 4-**H**), 4.25 (dd, 1H, 11-**H<sub>a</sub>**, merged with 4-**H**), 4.19 (dd, 1H,  $J = 6.8, 11.2$  Hz, 12-**H<sub>a</sub>**), 4.06 (d, 1H,  $J = 4.4$  Hz, -**OH**), 4.03-4.01 (m, 1H, 12-**H<sub>b</sub>**), 3.98-3.95 (m, 1H, 11-**H<sub>b</sub>**), 3.94-3.89 (m, 2H, 8-**H**), 3.91 (s, 2H, 5-**H**, 6-**H**), 3.38 (bs, 1H, -**OH**), 2.30 (t, 2H,  $J = 7.6$  Hz, 22-**H**), 2.25 (t, 2H,  $J = 7.6$  Hz, 13-**H**), 2.22 (ddd, 1H, 3**H** - merged with 13-**H**), 2.15-2.07

(m, 1H, 2-**H**), 1.65-1.58 (m, 4H, 14-**H**, 23-**H** - merged with water), 1.28 (bs, 24H, 15-20-**H**, 24-29-**H**), 0.88 (t, 6H,  $J = 6.4$  Hz, 21-**H**, 30-**H**);  $^{13}\text{C}$  NMR ( $\text{CDCl}_3$ , 100 MHz):  $\delta$  173.6, 173.3, 136.8, 128.6 (2C), 128.2, 128.0 (2C), 86.6, 84.1, 75.8, 74.3, 73.9, 66.9, 61.9, 60.6, 42.1, 40.9, 34.2 (2C), 31.8 (2C), 29.4 (2C), 29.2 (4C), 29.1 (2C), 24.9, 24.8, 22.6 (2C), 14.1 (2C); IR (neat): 3435, 2924, 2856, 1731, 1461, 1247, 1164, 1113, 832, 743  $\text{cm}^{-1}$ . HRMS (ESI) exact mass calcd. for  $\text{C}_{36}\text{H}_{59}\text{O}_8$  ( $\text{M}+\text{H}$ ) $^+$  619.4210, found ( $\text{M}+\text{H}$ ) $^+$  619.4211.

**(1-(benzyloxymethyl)-5,6-dihydroxy-7-oxabicyclo[2.2.1]heptane-2,3-diyl)bis(methylene) dioctanoate ((±)-12d)**

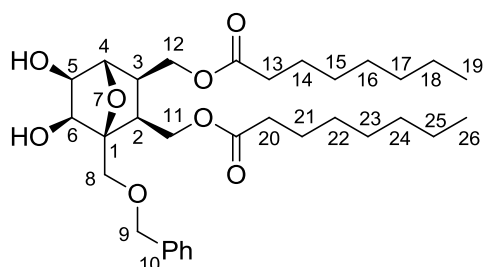

Colorless solid; Yield = 86%;  $R_f$  (40% EtOAc/Hexane), 0.34;  $^1\text{H}$  NMR ( $\text{CDCl}_3$ , 500 MHz):  $\delta$  7.38-7.29 (m, 5H, 10-**H**), 4.64 (d, 1H,  $J = 12.0$  Hz, 9-**H}\_a), 4.57 (d, 1H,  $J = 12.0$  Hz, 9-**H}\_b), 4.25 (s, 1H, 4-**H**), 4.27-4.21 (m, 2H, 11-**H}\_a**, 12-**H}\_a**), 4.00 (dd, 1H,  $J = 6.4, 9.2$  Hz, 12-**H}\_b**), 3.93 (m, 1H, 11-**H}\_b** - merged with 5H), 3.91 (s, 2H, 5-**H**, 6-**H**), 3.89-3.86 (m, 2H, 8-**H**), 3.46 (bs, 1H, -**OH**; the other -**OH** did not appear), 2.30 (t, 2H,  $J = 7.5$  Hz, 20-**H**), 2.25 (t, 2H,  $J = 7.5$  Hz, 13-**H**), 2.19 (ddd, 1H,  $J = 5.0, 7.2, 7.2$  Hz, 3-**H**), 2.13-2.08 (m, 1H, 2-**H**), 1.60 (quin, 4H,  $J = 6.8$  Hz, 14-**H**, 21-**H**), 1.31-1.28 (m, 16H, 15-18-**H**, 22-25-**H**), 0.89 (t, 6H,  $J = 7.0$  Hz, 19-**H**, 26-**H**);  $^{13}\text{C}$  NMR ( $\text{CDCl}_3$ , 125 MHz):  $\delta$  173.5, 173.2, 137.0, 128.6 (2C), 128.1, 128.0 (2C), 86.8, 84.1, 75.6, 74.3, 74.0, 66.7, 62.0, 60.7, 42.0, 41.0, 34.2 (2C), 31.6 (2C), 29.1 (2C), 28.8 (2C), 24.9, 24.8, 22.5 (2C), 14.0 (2C); IR (neat): 3412, 2928, 2857, 1739, 1456, 1364, 1166, 1116, 1072, 738, 699  $\text{cm}^{-1}$ . HRMS (ESI) exact mass calcd. for  $\text{C}_{32}\text{H}_{50}\text{O}_8\text{Na}$  ( $\text{M}+\text{Na}$ ) $^+$  585.3403, found ( $\text{M}+\text{Na}$ ) $^+$  585.3408.****

**(1-((benzyloxy)methyl)-5,6-dihydroxy-7-oxabicyclo[2.2.1]heptane-2,3-diyl)bis(methylene) dihexanoate ((±)-12e)**

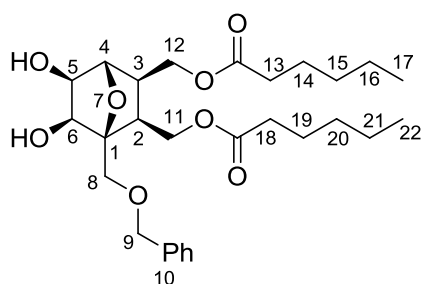

White crystalline solid; Yield = 85%;  $R_f$  (40% EtOAc/Hexane), 0.34; Mp. 88-89°C;  $^1\text{H}$  NMR ( $\text{CDCl}_3$ , 400 MHz):  $\delta$  7.39-7.32 (m, 5H, 10-H), 4.66 (d, 1H,  $J = 11.6$  Hz, 9-H<sub>a</sub>), 4.58 (d, 1H,  $J = 11.6$  Hz, 9-H<sub>b</sub>), 4.26 (s, 1H, 4-H), 4.27-4.23 (m, 1H, 11-H<sub>a</sub> - merged with 4-H), 4.19 (dd, 1H,  $J = 6.8, 11.2$  Hz, 12-H<sub>a</sub>), 4.04-3.99 (m, 2H, -OH, 12-H<sub>b</sub>), 3.97-3.94 (m, 1H, 11-H<sub>b</sub>), 3.92 (s, 2H, 5-H, 6-H), 3.91-3.88 (m, 2H, 8-H), 3.27 (d, 1H,  $J = 5.7$  Hz, -OH), 2.30 (t, 2H,  $J = 7.2$  Hz, 18-H), 2.25 (t, 2H,  $J = 7.6$  Hz, 13-H), 2.23-2.16 (m, 1H, 3-H - merged with 13-H), 2.14-2.08 (m, 1H, 2-H), 1.66-1.56 (m, 4H, 14-H, 19-H), 1.34-1.24 (m, 8H, 15-H, 16-H, 20-H, 21-H), 0.91-0.87 (m, 6H, 17-H, 22-H);  $^{13}\text{C}$  NMR ( $\text{CDCl}_3$ , 100 MHz):  $\delta$  173.5, 173.2, 136.7, 128.6 (2C), 128.2, 128.0 (2C), 86.5, 84.1, 75.8, 74.3, 73.9, 66.9, 61.9, 60.6, 42.1, 40.8, 34.2 (2C), 31.2 (2C), 24.6, 24.5, 22.3 (2C), 13.9 (2C): IR (neat): 3423, 2959, 2933, 2872, 1735, 1266, 1172, 1100, 742, 704  $\text{cm}^{-1}$ . HRMS (ESI) exact mass calcd. for  $\text{C}_{28}\text{H}_{42}\text{O}_8\text{Na}$  ( $\text{M}+\text{Na}$ )<sup>+</sup> 529.2777, found ( $\text{M}+\text{Na}$ )<sup>+</sup> 529.2797.

**(1-(benzyloxymethyl)-5,6-dihydroxy-7-oxabicyclo[2.2.1]heptane-2,3-diyl)bis(methylene) dipentanoate: ((±)-12f)**

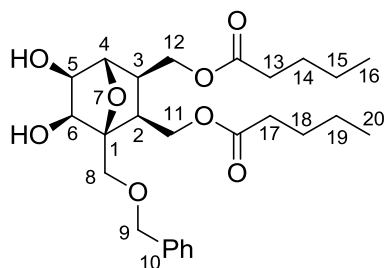

Colorless solid; Yield = 84%;  $R_f$  (40% EtOAc/Hexane), 0.33;  $^1\text{H}$  NMR ( $\text{CDCl}_3$ , 400 MHz):  $\delta$  7.39-7.30 (m, 5H, 10-**H**), 4.66 (d, 1H,  $J = 11.6$  Hz, 9-**H<sub>a</sub>**), 4.57 (d, 1H,  $J = 11.6$  Hz, 9-**H<sub>b</sub>**), 4.26 (s, 1H, 4-**H**), 4.25 (dd, 1H, 11-**H<sub>a</sub>** - merged with 4-**H**), 4.20 (dd, 1H,  $J = 6.8, 11.6$  Hz, 12-**H<sub>a</sub>**), 4.03-3.98 (m, 1H, 12-**H<sub>b</sub>**), 3.97-3.93 (m, 1H, 11-**H<sub>b</sub>**), 3.92-3.89 (m, 5H, -**OH**, 5-**H**, 6-**H**, 8-**H**), 3.42 (bs, 1H, -**OH**), 2.31 (t, 2H,  $J = 7.6$  Hz, 17-**H**), 2.26 (t, 2H,  $J = 7.2$  Hz, 13-**H**), 2.24-2.17 (m, 1H, 3-**H**), 2.15-2.08 (m, 1H, 2-**H**), 1.64-1.53 (m, 4H, 14-**H**, 18-**H** - merged with water peak), 1.39-1.27 (m, 4H, 15-**H**, 19-**H**), 0.94-0.89 (m, 6H, 16-**H**, 20-**H**);  $^{13}\text{C}$  NMR ( $\text{CDCl}_3$ , 100 MHz):  $\delta$  173.5, 173.2, 136.9, 128.5 (2C), 128.0, 127.9 (2C), 86.8, 84.0, 75.4, 74.2, 73.9, 66.5, 61.9, 60.8, 41.8, 40.9, 33.9 (2C), 26.9, 26.8, 22.1 (2C), 13.6 (2C); IR (neat): 3404, 2960, 2871, 1734, 1460, 1266, 1173, 910, 742  $\text{cm}^{-1}$ ; HRMS (ESI) exact mass calcd. for  $\text{C}_{26}\text{H}_{38}\text{O}_8\text{Na}$  ( $\text{M}+\text{Na}$ ) $^+$  501.2464, found ( $\text{M}+\text{Na}$ ) $^+$  501.2466.

#### General procedure the deprotection of Benzyl groups from ( $\pm$ )-**12a-f**:

A mixture of the benzyl ether (**12a-f**) and 10% Pd/c (20% w/w) in  $\text{CHCl}_3$  was stirred under hydrogen atmosphere ( $\text{H}_2$  balloon) at room temperature for 5 h. After completion of the reaction, the resulting mixture was filtered through a celite bed and the solvent was evaporated under reduced pressure. The resulting solid was purified by column chromatography using EtOAc-Hexanes as solvent system in a gradient mode. Yields and spectroscopic details of various compounds synthesized are given below.

#### (5,6-dihydroxy-1-(hydroxymethyl)-7-oxabicyclo[2.2.1]heptane-2,3-diyl)bis(methylene) ditetradecanoate (( $\pm$ )-**13a**)

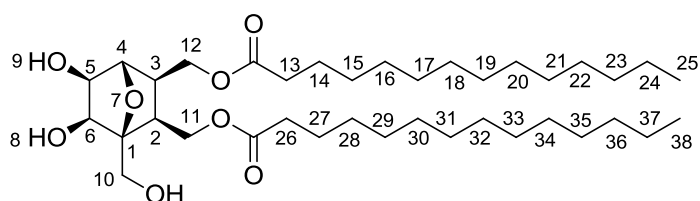

Colorless solid; Yield = 86%;  $R_f$  (EtOAc), 0.60;  $^1\text{H}$  NMR ( $\text{CDCl}_3$ , 400 MHz):  $\delta$  4.28 (d, 1H,  $J = 4.8$  Hz, -OH), 4.24 (s, 1H, 4-H), 4.21 (dd, 1H,  $J = 5.6, 11.2$  Hz, 12-H<sub>a</sub>), 4.30-3.98 (m, 4H, 10-H, 11-H), 3.96-3.91 (m, 3H, 5-H, 6-H, 12-H<sub>b</sub>), 3.40 (d, 1H,  $J = 5.6$  Hz, -OH), 2.96 (bs, 1H, -OH), 2.34-2.28 (m, 4H, 13-H, 26-H), 2.24 (ddd, 1H,  $J = 5.6, 9.6, 9.6$  Hz, 3-H), 2.15-2.09 (m, 1H, 2-H), 1.64-1.58 (m, 4H, 14-H, 27-H), 1.30-1.24 (m, 40H, 15-24-H, 28-37-H), 0.88 (t, 6H,  $J = 6.4$  Hz, 25-H, 38-H);  $^{13}\text{C}$  NMR ( $\text{CDCl}_3$ , 100 MHz):  $\delta$  173.6, 173.2, 87.7, 83.6, 76.3, 74.0, 61.8, 60.6, 60.1, 41.9, 41.0, 34.3 (2C), 31.9 (2C), 29.7 (8C), 29.5 (2C), 29.4 (2C), 29.3 (2C), 29.2 (2C), 24.92, 24.85, 22.7 (2C), 14.1 (2C); IR (neat): 3354, 2921, 2852, 1727, 1264, 1112, 1087, 1020, 743  $\text{cm}^{-1}$ ; HRMS (ESI) exact mass calcd. for  $\text{C}_{37}\text{H}_{68}\text{O}_8\text{Na}$  ( $\text{M}+\text{Na}$ )<sup>+</sup> 663.4812, found ( $\text{M}+\text{Na}$ )<sup>+</sup> 663.4830.

**(5,6-dihydroxy-1-(hydroxymethyl)-7-oxabicyclo[2.2.1]heptane-2,3-diyl)bis(methylene) didodecanoate ((±)-13b)**

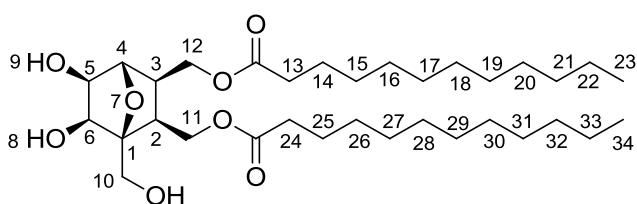

Colorless solid; Yield = 72%;  $R_f$  (EtOAc), 0.60;  $^1\text{H}$  NMR ( $\text{CDCl}_3$ , 400 MHz):  $\delta$  4.24 (s, 1H, 4-H), 4.21 (dd, 1H,  $J = 5.6, 10.8$  Hz, 12-H<sub>a</sub>), 4.17-4.08 (m, 5H, 11-H, 10-H, -OH), 4.03-3.90 (m, 3H, 12-H<sub>b</sub>, 5-H, 6-H), 3.22 (bs, 1H, -OH), 2.72 (bs, 1H, -OH), 2.33-2.29 (m, 4H, 13-H, 24-H), 2.24 (ddd, 1H,  $J = 6.4, 10.0, 10.0$  Hz, 3-H), 2.16-2.10 (m, 1H, 2-H), 1.65-1.59 (m, 4H, 14-H, 25-H - merged with water peak), 1.26 (bs, 32H, 15-22-H, 26-33-H), 0.88 (t, 6H,  $J = 6.8$  Hz, 23-H, 34-H);  $^{13}\text{C}$  NMR ( $\text{CDCl}_3$ , 100 MHz):  $\delta$  173.8, 173.4, 87.9, 83.7, 76.2, 74.1, 62.0, 60.8, 59.8, 41.9, 41.1, 34.4 (2C), 32.0 (2C), 29.7 (4C), 29.6 (2C), 29.5 (2C), 29.4 (2C), 29.3 (2C), 25.0, 24.9, 22.8 (2C), 14.2 (2C); IR (neat): 3366, 2921, 2854, 1729, 1465, 1407, 1267, 1177, 1017, 826, 721  $\text{cm}^{-1}$ ; HRMS (ESI) exact mass calcd. for  $\text{C}_{33}\text{H}_{60}\text{O}_8\text{Na}$  ( $\text{M}+\text{Na}$ )<sup>+</sup> 607.4186, found ( $\text{M}+\text{Na}$ )<sup>+</sup> 607.4182.

**(5,6-dihydroxy-1-(hydroxymethyl)-7-oxabicyclo[2.2.1]heptane-2,3-diyl)bis(methylene)bis(decanoate) ((±)-13c)**

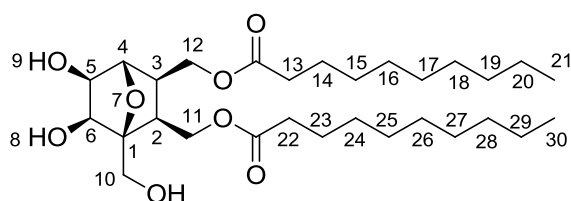

Colorless solid; Yield = 95%;  $R_f$  (EtOAc), 0.60;  $^1\text{H}$  NMR ( $\text{CDCl}_3$ , 400 MHz):  $\delta$  4.46 (bs, 1H, -OH), 4.24 (s, 1H, 4-H), 4.21 (dd, 1H,  $J = 5.6, 10.8$  Hz, 12-H<sub>a</sub>), 4.17-4.06 (m, 4H, 10-H, 11-H), 4.04-3.91 (m, 3H, 5-H, 6-H, 12-H<sub>b</sub>), 3.66 (bs, 1H, -OH), 3.27 (bs, 1H, -OH), 2.35-2.28 (m, 4H, 13-H, 22-H), 2.24 (ddd, 1H,  $J = 5.6, 9.6, 9.6$  Hz, 3-H), 2.15-2.09 (m, 1H, 2-H), 1.68-1.56 (m, 4H, 14-H, 23-H), 1.27 (bs, 24H, 15-20-H, 24-29-H), 0.88 (t, 6H,  $J = 6.8$  Hz, 21-H, 30-H);  $^{13}\text{C}$  NMR ( $\text{CDCl}_3$ , 100 MHz):  $\delta$  173.6, 173.2, 87.7, 83.5, 76.2, 73.9, 61.8, 60.5, 59.9, 41.8, 40.9, 34.2 (2C), 31.8 (2C), 29.4 (2C), 29.2 (4C), 29.1 (2C), 24.9, 24.8, 22.6 (2C), 14.1 (2C); IR (neat): 3384, 2923, 2856, 1729, 1462, 1261, 1179, 1021, 827, 730  $\text{cm}^{-1}$ ; HRMS (ESI) exact mass calcd. for  $\text{C}_{29}\text{H}_{53}\text{O}_8$  ( $\text{M}+\text{H}$ )<sup>+</sup> 529.3740, found ( $\text{M}+\text{H}$ )<sup>+</sup> 529.3740.

**(5,6-dihydroxy-1-(hydroxymethyl)-7-oxabicyclo[2.2.1]heptane-2,3-diyl)bis(methylene)dioctanoate ((±)-13d)**

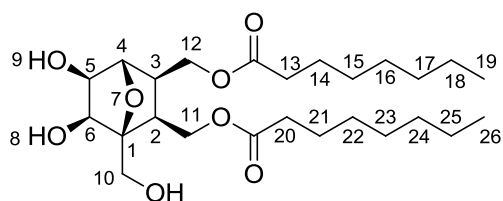

Colorless solid; Yield = 95%;  $R_f$  (EtOAc), 0.58;  $^1\text{H}$  NMR ( $\text{CDCl}_3$ , 400 MHz): 4.57 (bs, 1H, -OH), 4.23 (s, 1H, 4-H), 4.22-4.16 (m, 2H, 12-H<sub>a</sub>, -OH), 4.12-4.00 (m, 4H, 11-H, 10-H), 3.99-3.90 (m, 3H, 5-H, 6-H, 12-H<sub>b</sub>), 3.57 (bs, 1H, -OH), 2.34-2.28 (m, 4H, 13-H, 20-H), 2.23 (ddd, 1H,  $J = 6.0, 9.6, 9.6$  Hz, 3-H), 2.16-2.10 (m, 1H, 2-H), 1.66-1.58 (m, 4H, 14-H, 21-H), 1.29 (bs, 16H, 15-18-H, 22-25-H), 0.89 (t, 6H,  $J = 6.0$  Hz, 19-H, 26-H);  $^{13}\text{C}$  NMR



(CDCl<sub>3</sub>,

100

MHz):  $\delta$  173.6, 173.3, 87.8, 83.5, 76.0, 73.9, 61.8, 60.7, 59.6, 41.8, 40.9, 34.2 (2C), 31.6 (2C), 29.0 (2C), 28.8 (2C), 24.83, 24.76, 22.5 (2C), 13.9 (2C); IR (neat): 3367, 2951, 2864, 1729, 1464, 1408, 1276, 1180, 1013, 962, 827 cm<sup>-1</sup>; HRMS (ESI) exact mass calcd. for C<sub>25</sub>H<sub>45</sub>O<sub>8</sub> (M+H)<sup>+</sup> 473.3114, found (M+H)<sup>+</sup> 473.3109.

**(5,6-dihydroxy-1-(hydroxymethyl)-7-oxabicyclo[2.2.1]heptane-2,3-diyl)bis(methylene) dihexanoate ((±)-13e)**

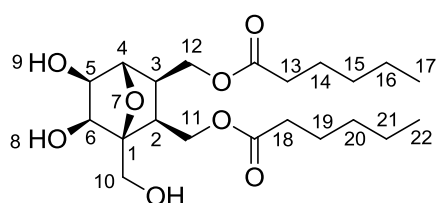

Colorless solid; Yield = 93%; R<sub>f</sub> (EtOAc), 0.58; <sup>1</sup>H NMR (CDCl<sub>3</sub>, 400 MHz):  $\delta$  4.40 (bs, 1H, -OH), 4.24 (s, 1H, 4-H), 4.20 (dd, 1H, *J* = 5.2, 10.8 Hz, 12-H<sub>a</sub>), 4.12-4.04 (m, 4H, 10-H, 11-H), 4.01-3.90 (m, 3H, 5-H, 6-H, 12-H<sub>b</sub>), 3.58 (bs, 1H, -OH), 3.15 (bs, 1H, -OH), 2.33-2.28 (m, 4H, 13-H, 18-H) 2.27-2.21 (m, 1H, 3-H), 2.15-2.09 (m, 1H, 2-H), 1.65-1.58 (m, 4H, 14-H, 19-H), 1.33-1.23 (m, 8H, 15-16-H, 20-21-H), 0.89 (t, 6H, *J* = 6.4 Hz, 17-H, 22-H); <sup>13</sup>C NMR (CDCl<sub>3</sub>, 100 MHz):  $\delta$  173.7, 173.4, 87.8, 83.5, 75.8, 73.9, 61.9, 60.7, 59.4, 41.6, 40.9, 33.9 (2C), 26.9 (2C), 26.8 (2C), 22.2 (2C), 13.6 (2C). IR (neat): 3446, 3056, 2956, 2929, 2866, 1736, 1463, 1170, 1113, 1024, 744, 613 cm<sup>-1</sup>; HRMS (ESI) exact mass calcd. for C<sub>21</sub>H<sub>36</sub>O<sub>8</sub>Na (M+Na)<sup>+</sup> 439.2308, found (M+Na)<sup>+</sup> 439.2307.

**(5,6-dihydroxy-1-(hydroxymethyl)-7-oxabicyclo[2.2.1]heptane-2,3-diyl)bis(methylene) dipentanoate ((±)-13f)**

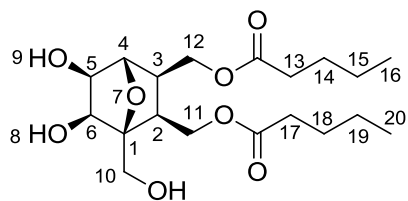

Colorless solid; Yield = 91%;  $R_f$  (EtOAc), 0.58;  $^1\text{H NMR}$  ( $\text{CDCl}_3$ , 400 MHz):  $\delta$  4.69 (bs, 1H, -OH), 4.23 (s, 1H, 4-H), 4.22 (dd, 1H, 12-H<sub>a</sub> - merged with 4H), 4.16-4.00 (m, 4H, 10-H, 11-H), 3.98-3.93 (m, 3H, 5-H, 6-H & 12-H<sub>b</sub>), 3.81 (bs, 1H, -OH), 2.58 (bs, 1H, -OH), 2.35-2.29 (m, 4H, 13-H, 17-H), 2.23 (ddd, 1H,  $J = 5.2, 9.2, 9.2$  Hz, 3-H), 2.12-2.11 (m, 1H, 2-H), 1.65-1.56 (m, 4H, 14-H, 18-H), 1.41-1.29 (m, 4H, 15-H, 19-H), 0.94-0.89 (m, 6H, 16-H, 20-H);  $^{13}\text{C NMR}$  ( $\text{CDCl}_3$ , 100 MHz):  $\delta$  173.7, 173.4, 87.8, 83.5, 75.8, 73.9, 61.9, 60.7, 59.4, 41.6, 40.9, 33.9 (2C), 26.85, 26.77, 22.2 (2C), 13.6 (2C); IR (neat): 3403, 2960, 2871, 1734, 1266, 1173, 910, 742  $\text{cm}^{-1}$ ; HRMS (ESI) exact mass calcd. for  $\text{C}_{19}\text{H}_{32}\text{O}_8\text{K}$  ( $\text{M}+\text{K}$ )<sup>+</sup> 427.1734, found ( $\text{M}+\text{K}$ )<sup>+</sup> 427.1726.

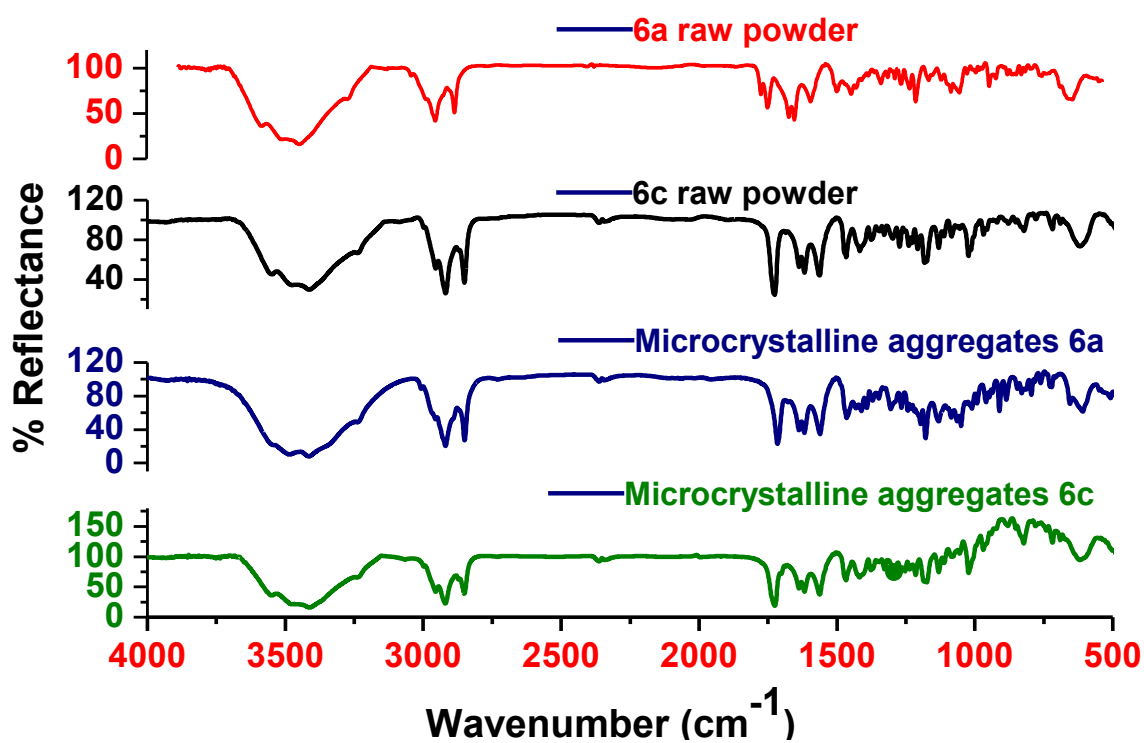

**Figure 1.** IR Spectra comparison of authentic samples of **6a** and **6c** with the microcrystalline aggregates of these samples prepared by adding their acetonitrile solution (200  $\mu\text{L}$ ; 1  $\text{mg mL}^{-1}$ ) to a solution of P123 in water (5  $\text{g L}^{-1}$ , 1  $\text{mL}$ )

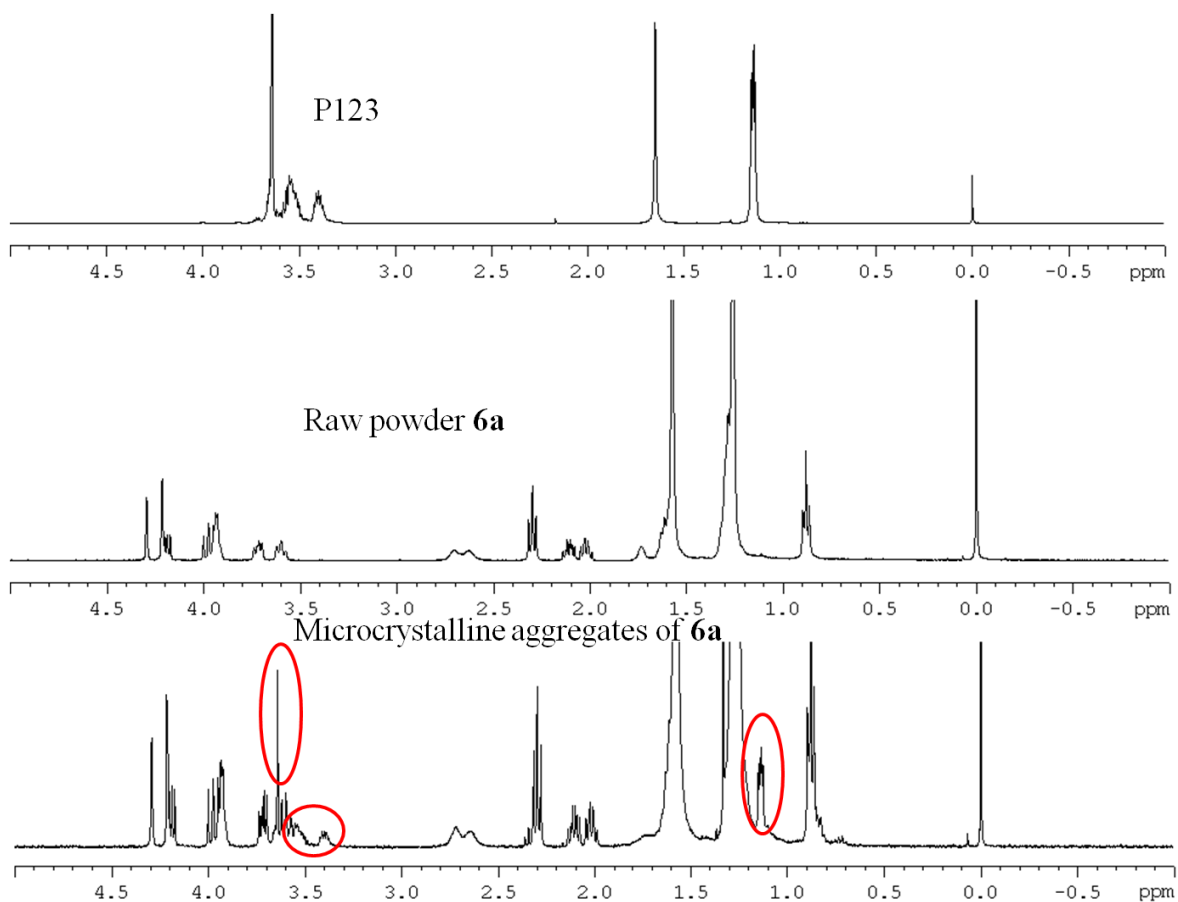

**Figure 2.** <sup>1</sup>H-NMR (400 MHz, CDCl<sub>3</sub>) Spectra comparison of authentic sample of **6a** with the microcrystalline aggregates. Red colored circle indicates presence of trace amount of P123 in microcrystalline aggregates **6a**.

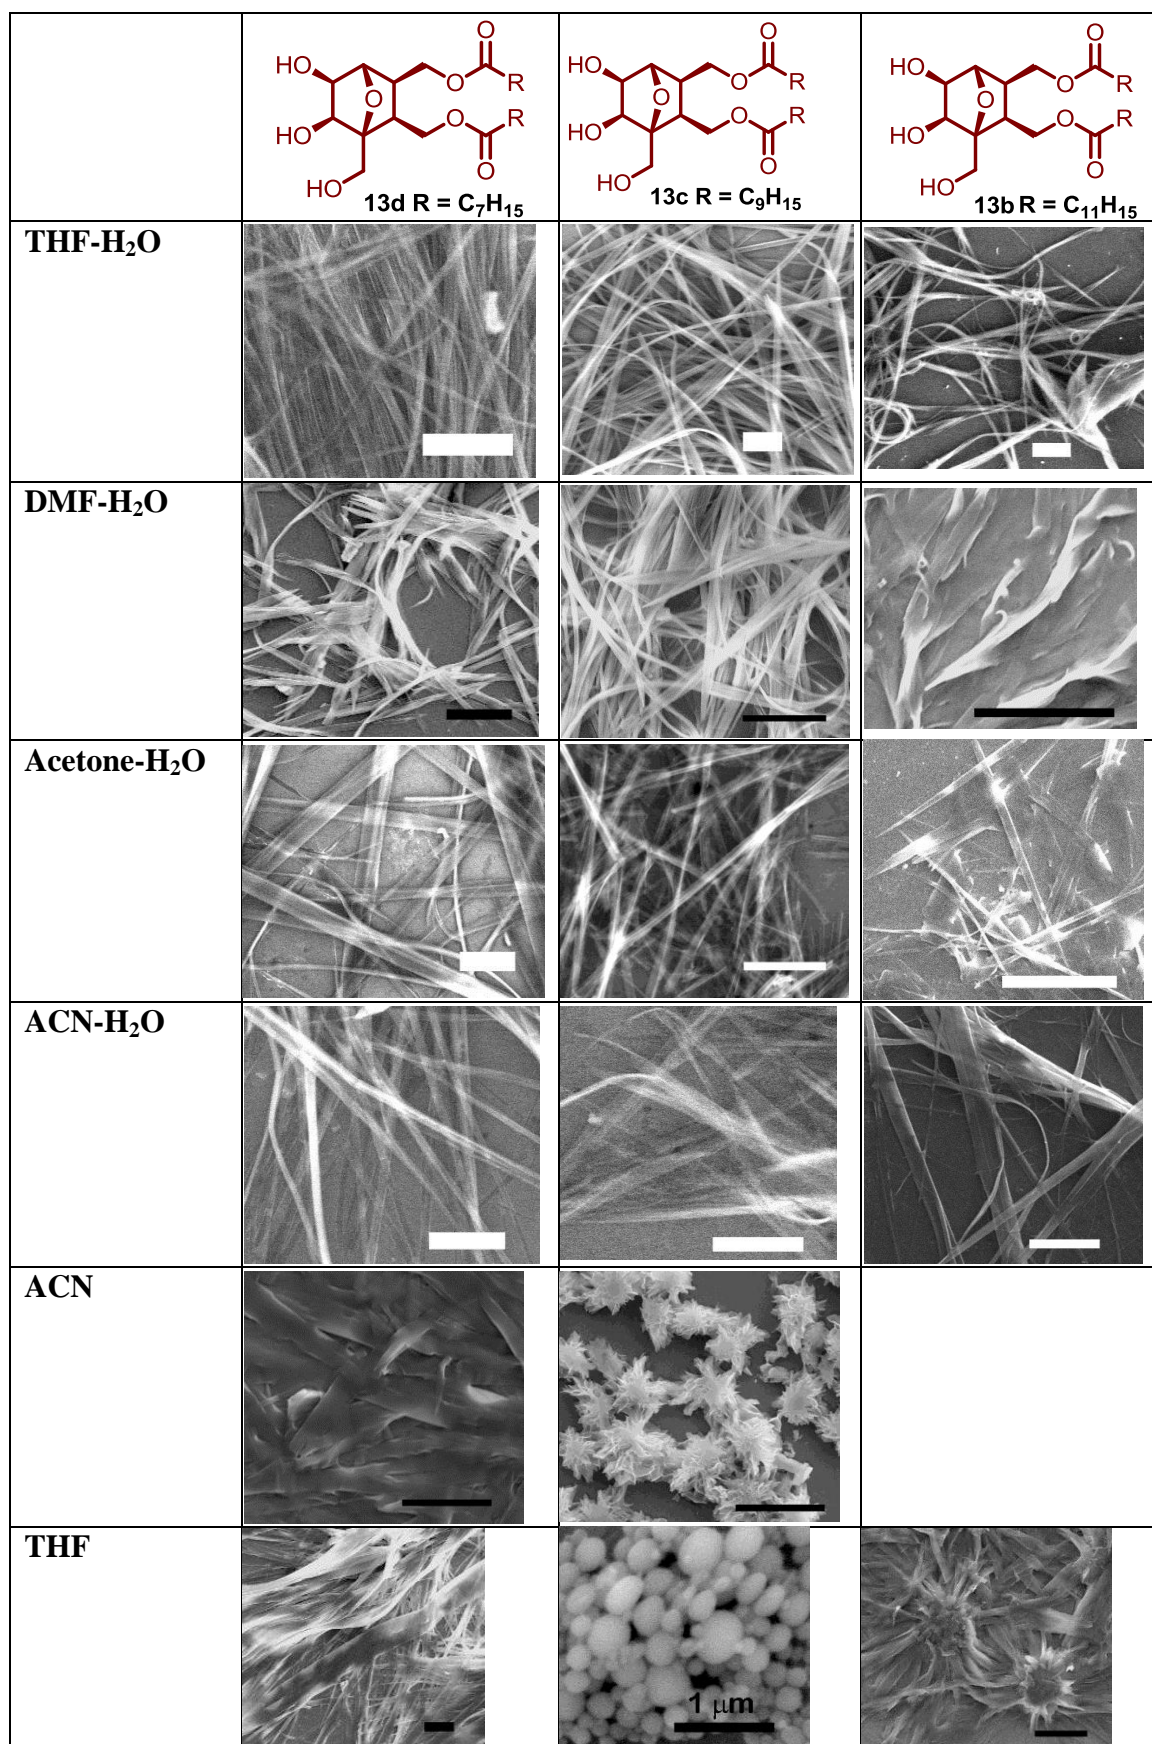

**Figure 3.** SEM images of the samples prepared under various conditions; Scale bar 10  $\mu$ M.

### Crystallographic information of compounds **3c** & **12e**

|                                             | <b>3c</b>                                      | <b>12e</b>                                     |
|---------------------------------------------|------------------------------------------------|------------------------------------------------|
| CCDC number                                 | 846065                                         | 812794                                         |
| Empirical formula                           | C <sub>18</sub> H <sub>32</sub> O <sub>6</sub> | C <sub>28</sub> H <sub>42</sub> O <sub>8</sub> |
| M <sub>r</sub>                              | 344.44                                         | 506.62                                         |
| Crystal system                              | Monoclinic                                     | Triclinic                                      |
| Space group                                 | P2(1)                                          | P-1                                            |
| <i>a</i> [Å]                                | 5.5386(5)                                      | 5.474(3)                                       |
| <i>b</i> [Å]                                | 7.0291(7)                                      | 12.149(7)                                      |
| <i>c</i> [Å]                                | 23.255(2)                                      | 21.524(11)                                     |
| $\beta$ [°]                                 | 93.015(5)                                      | 86.90(3)                                       |
| <i>V</i> [Å <sup>3</sup> ]                  | 904.10(15)                                     | 1418.2(13)                                     |
| <i>Z</i>                                    | 2                                              | 2                                              |
| $\rho_{\text{calcd}}$ [mg m <sup>-3</sup> ] | 1.265                                          | 1.186                                          |
| $\mu$ [mm <sup>-1</sup> ]                   | 0.093                                          | 0.086                                          |
| <i>F</i> (000)                              | 376                                            | 548                                            |
| Crystal size [mm]                           | 0.35 x 0.22 x 0.15                             | 0.30 x 0.20 x 0.20                             |
| $\theta$ range [°]                          | 0.88 to 30.65                                  | 0.95 to 24.18                                  |
| Reflections collected                       | 7136                                           | 22200                                          |
| Independent reflections                     | 4128 [R(int) = 0.0287]                         | 4498 [R(int) = 0.0297]                         |
| Data/restraints/parameters                  | 4128 / 1 / 231                                 | 4498 / 72 / 343                                |
| Goodness-of-fit on <i>F</i> <sup>2</sup>    | 1.033                                          | 1.074                                          |
| Final R indices [I > 2 $\sigma$ (I)]        | R1 = 0.0496, wR2 = 0.0990                      | R1 = 0.0704, wR2 = 0.1861                      |

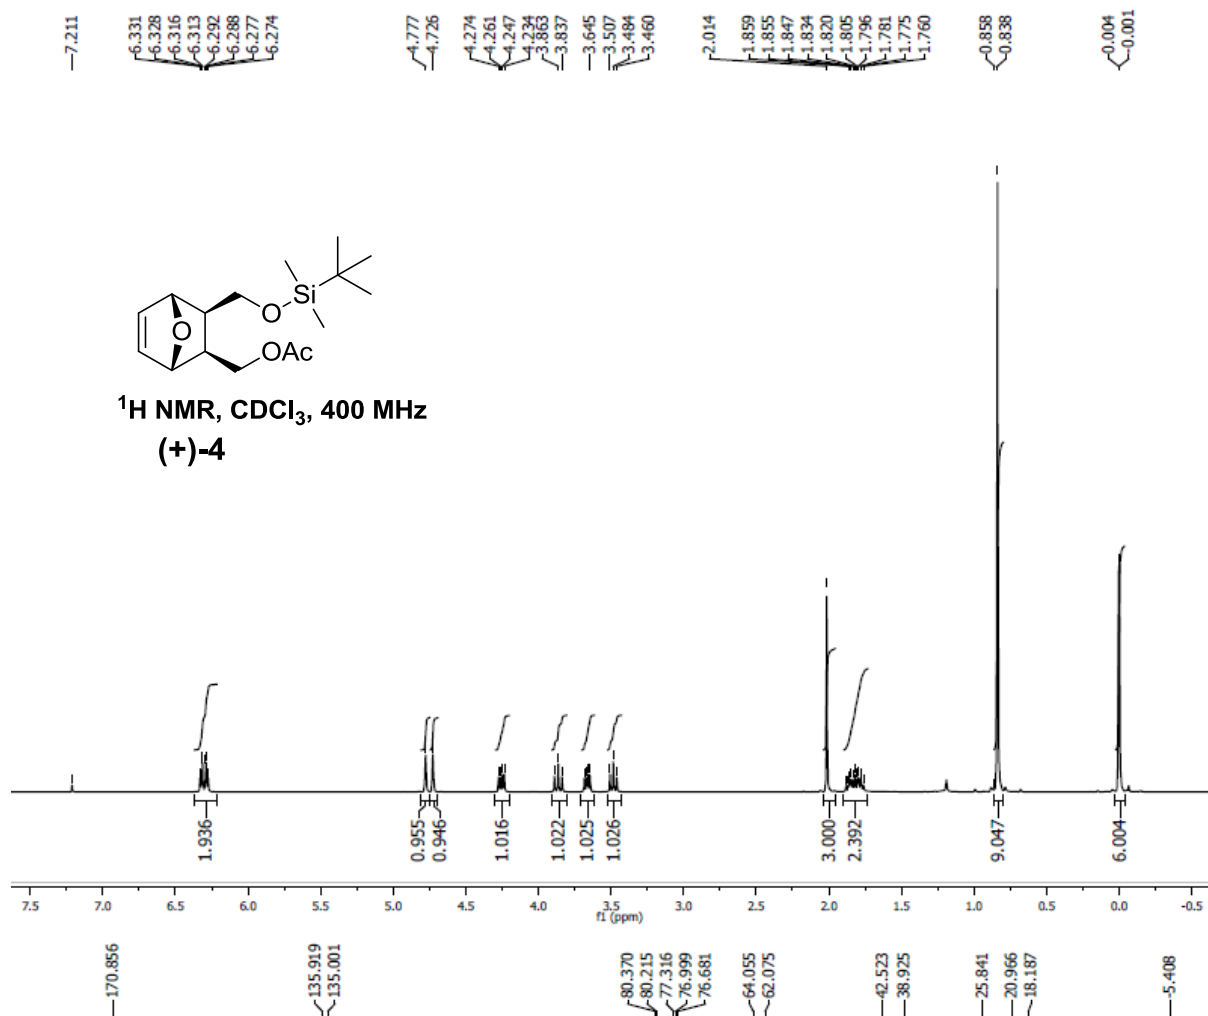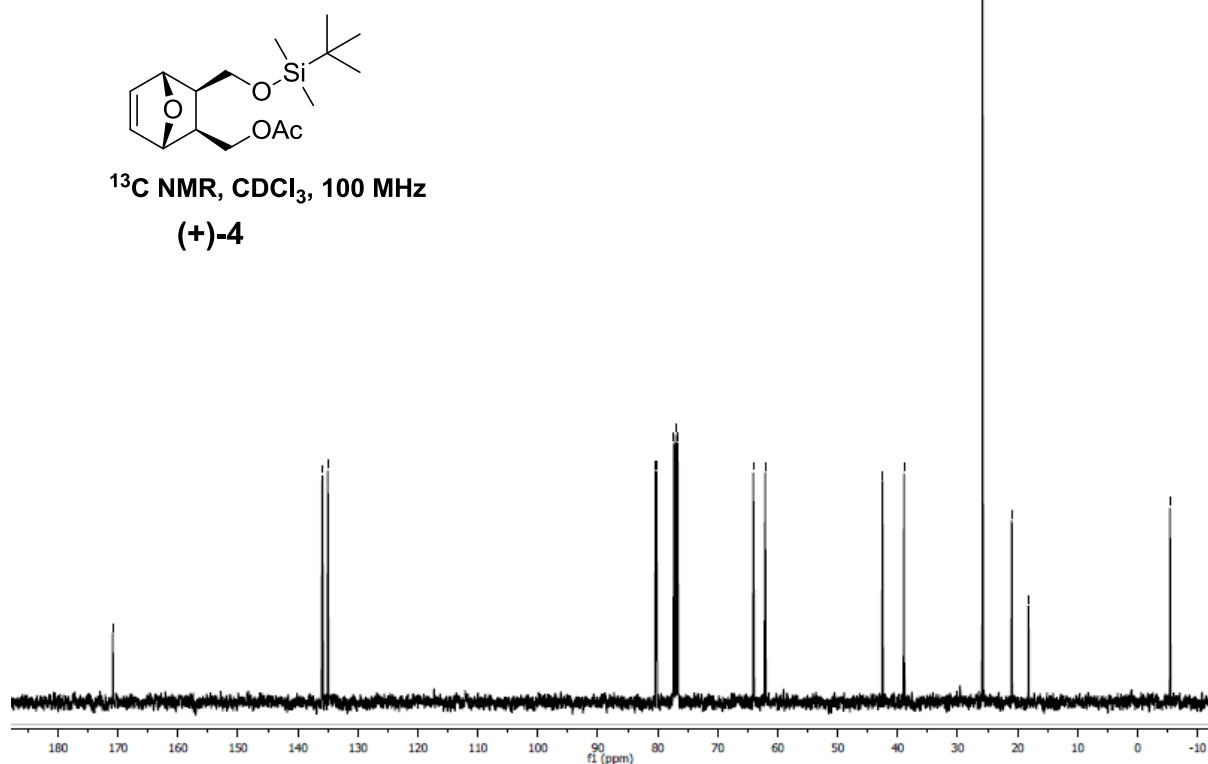

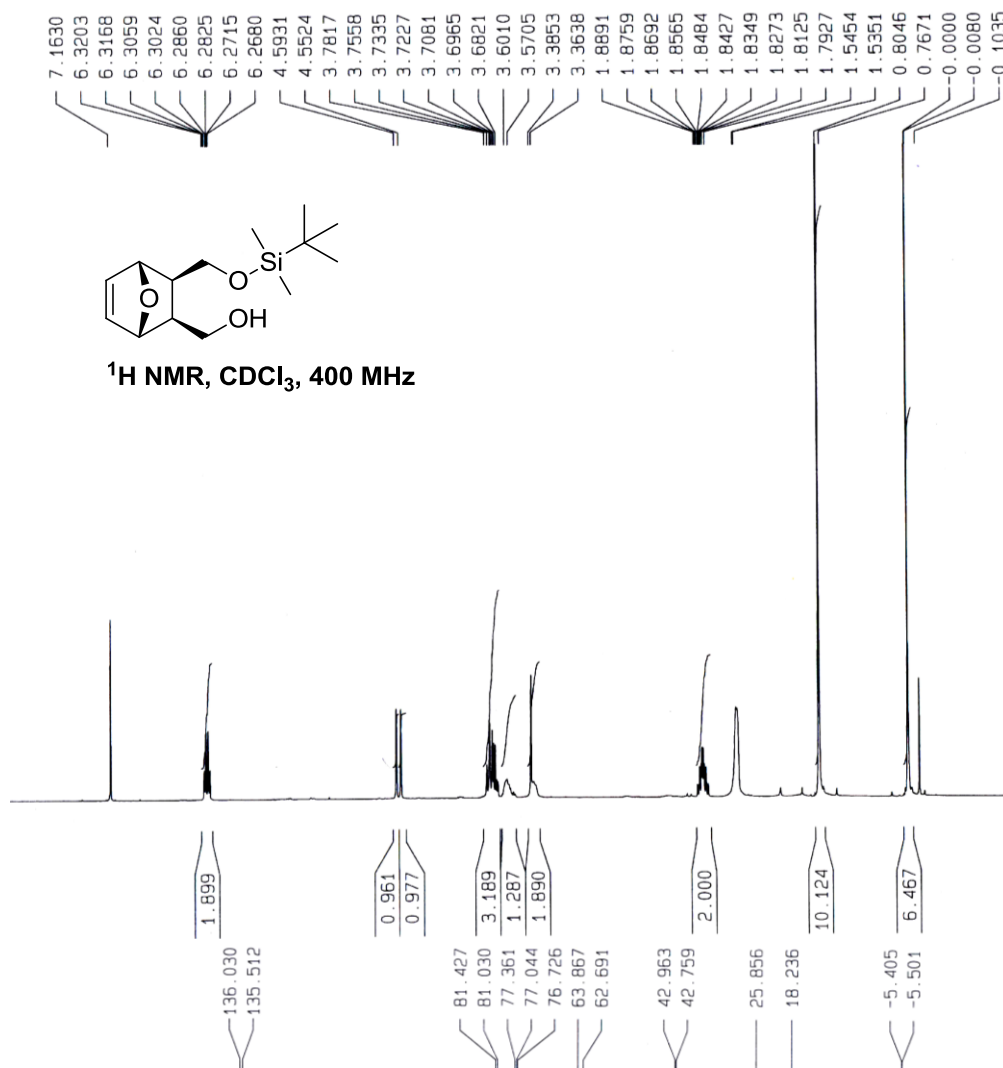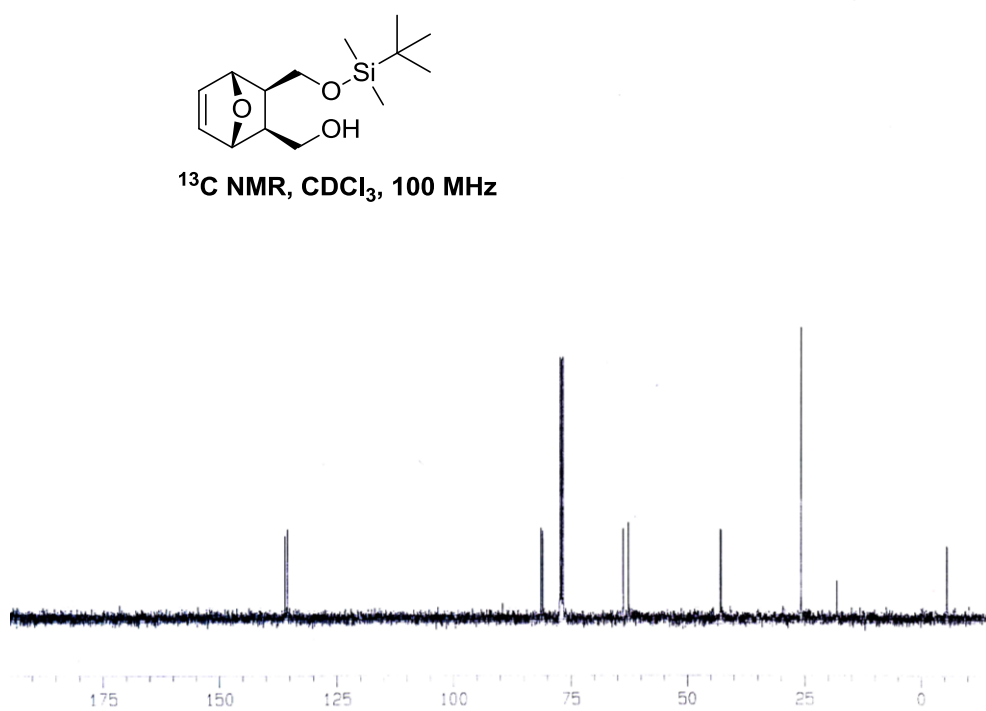



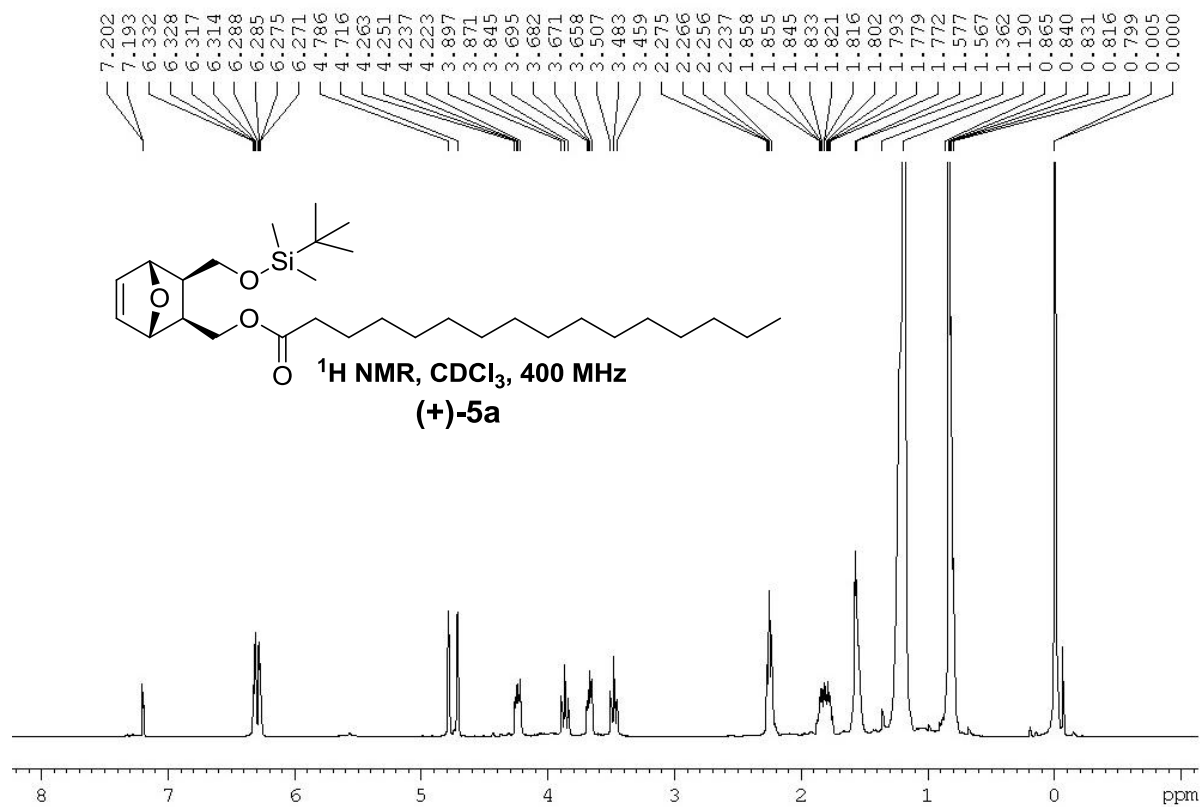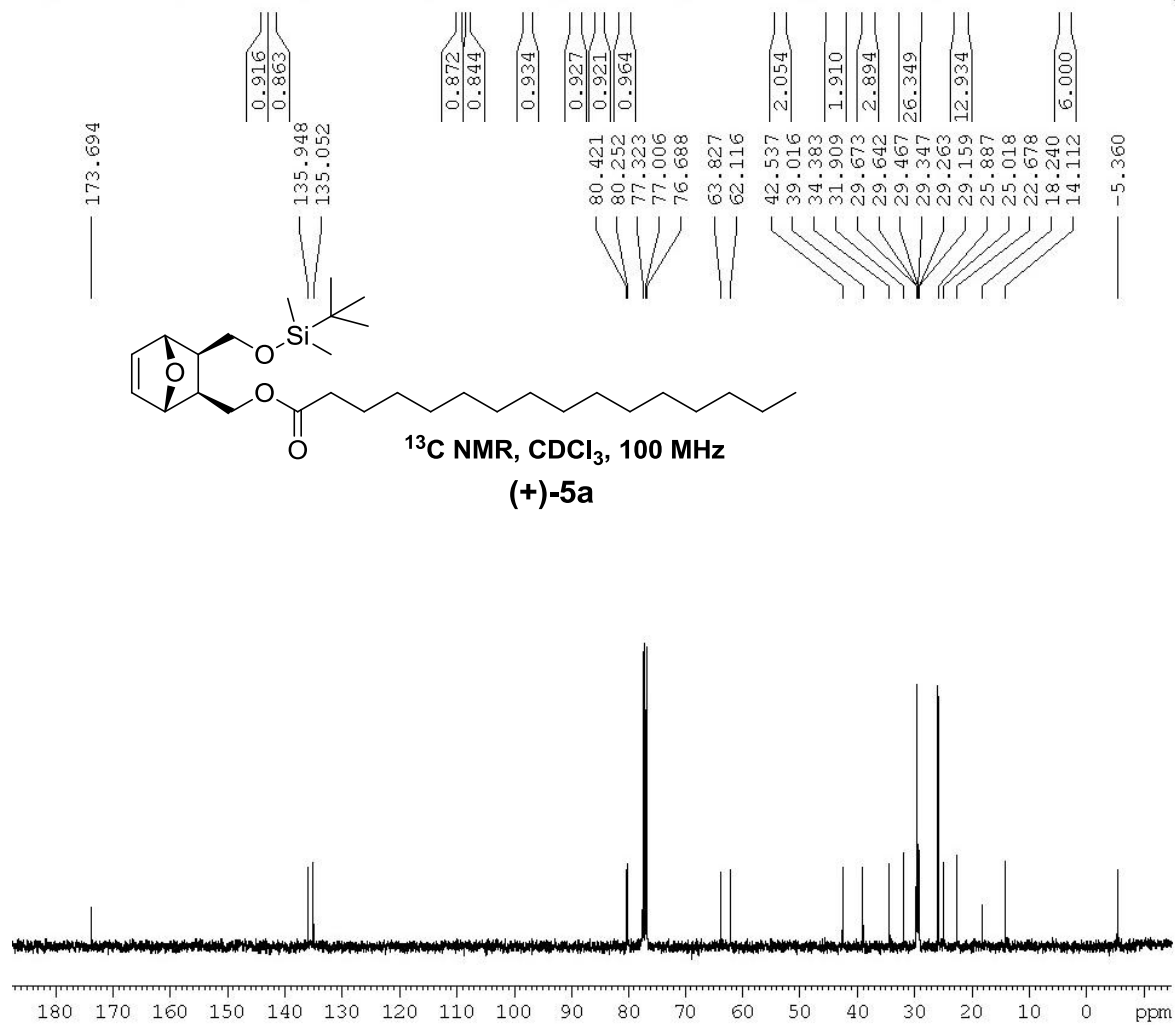

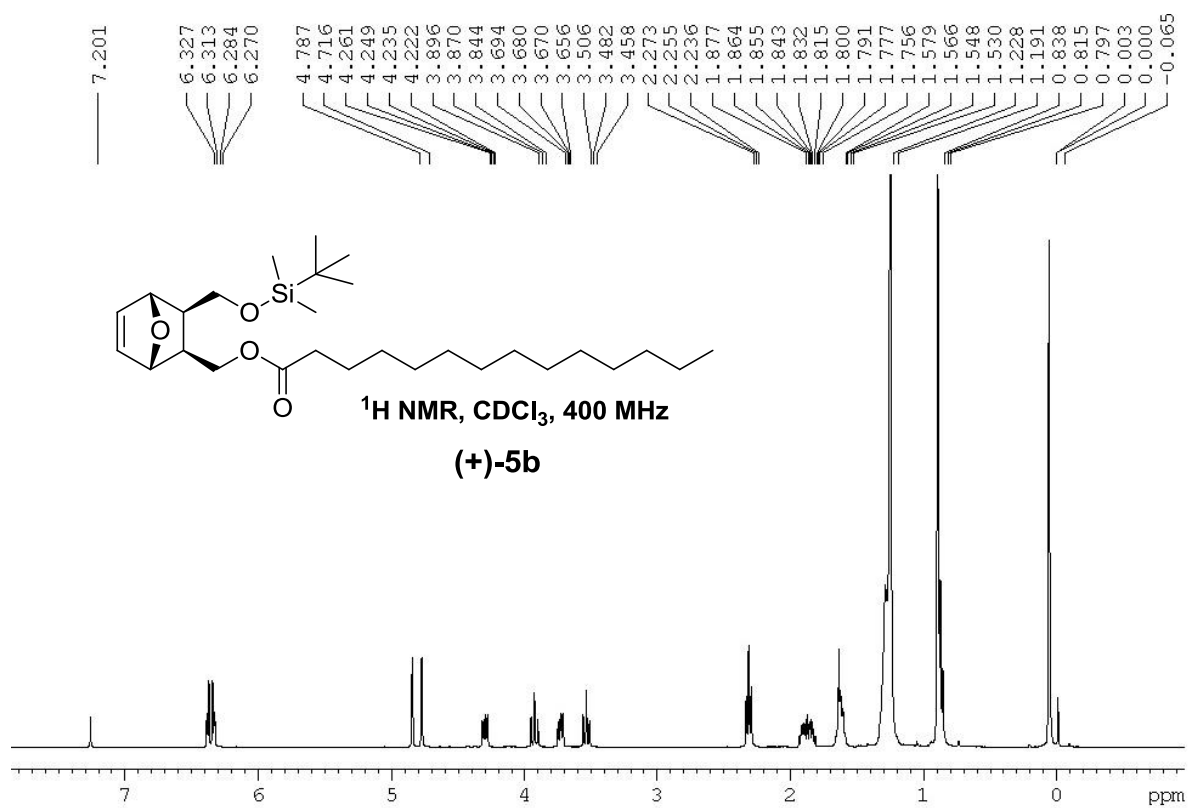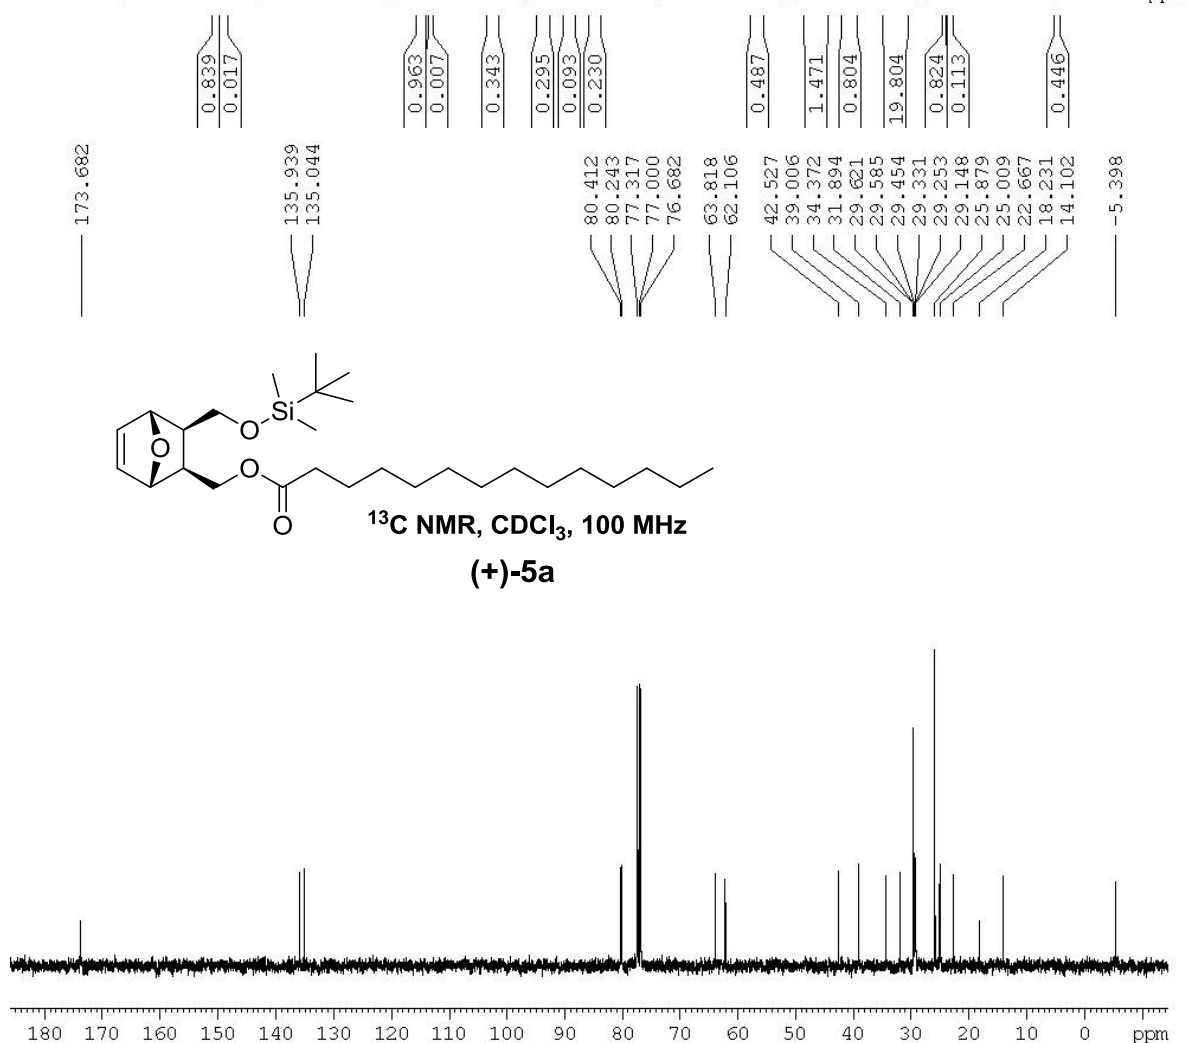

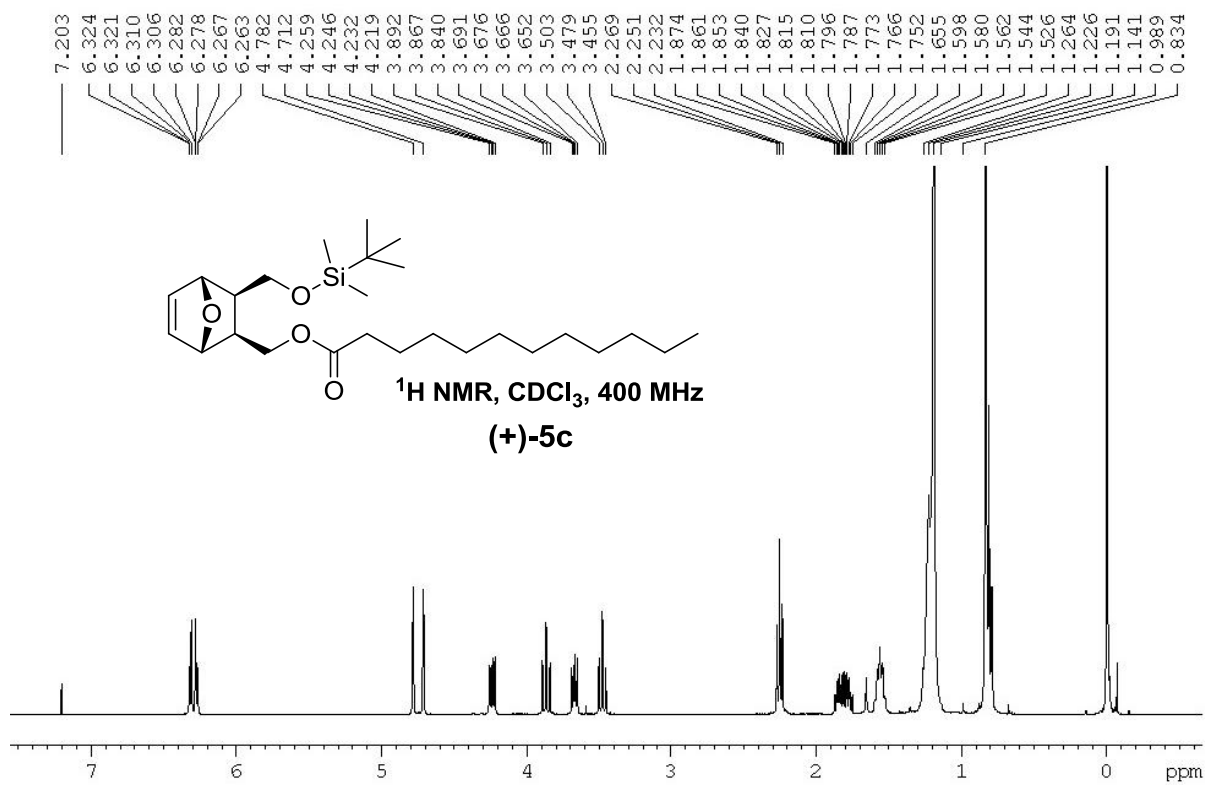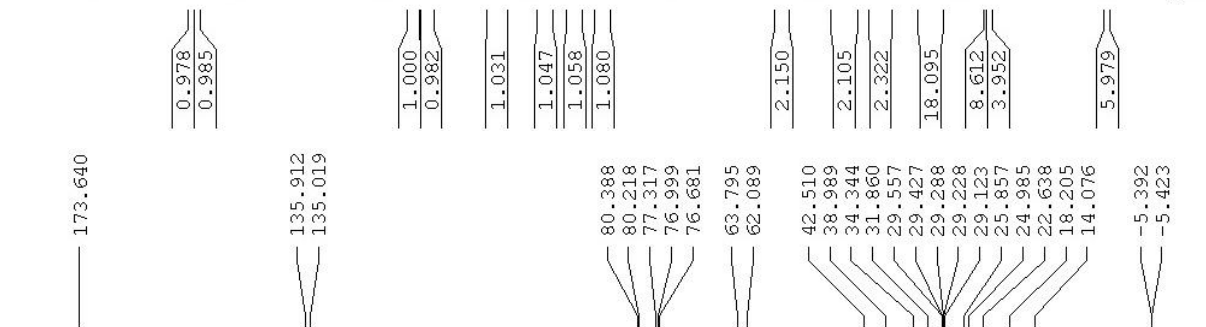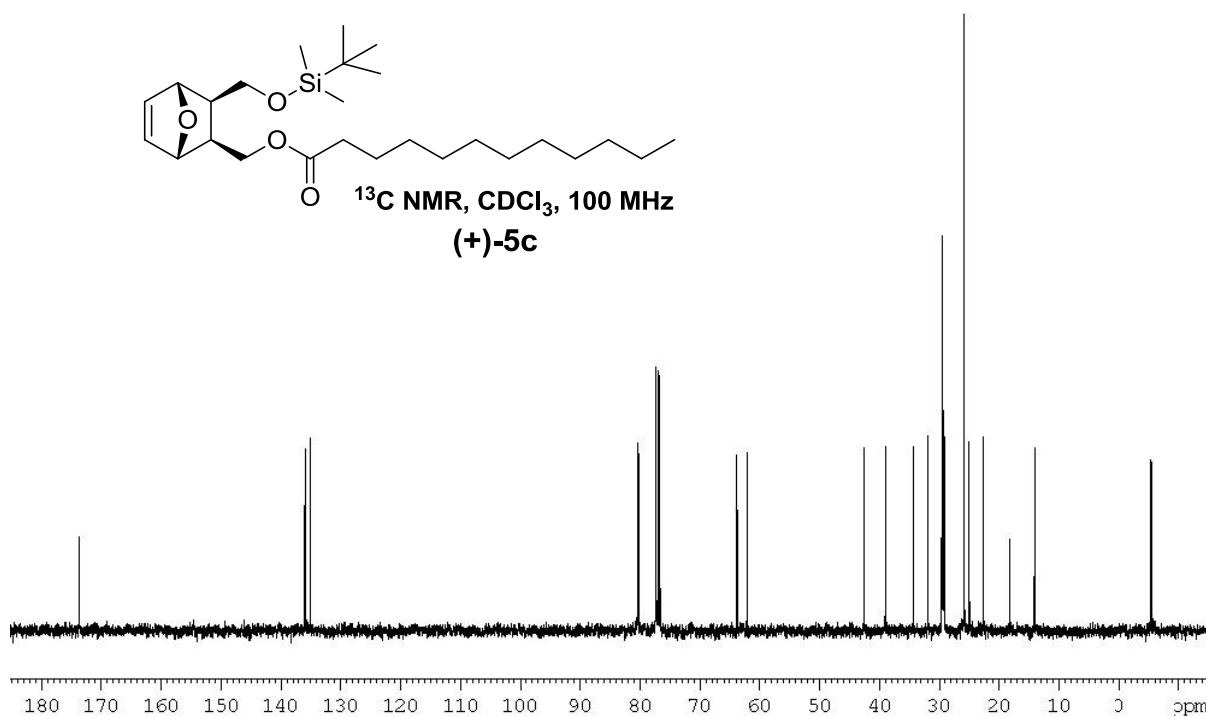

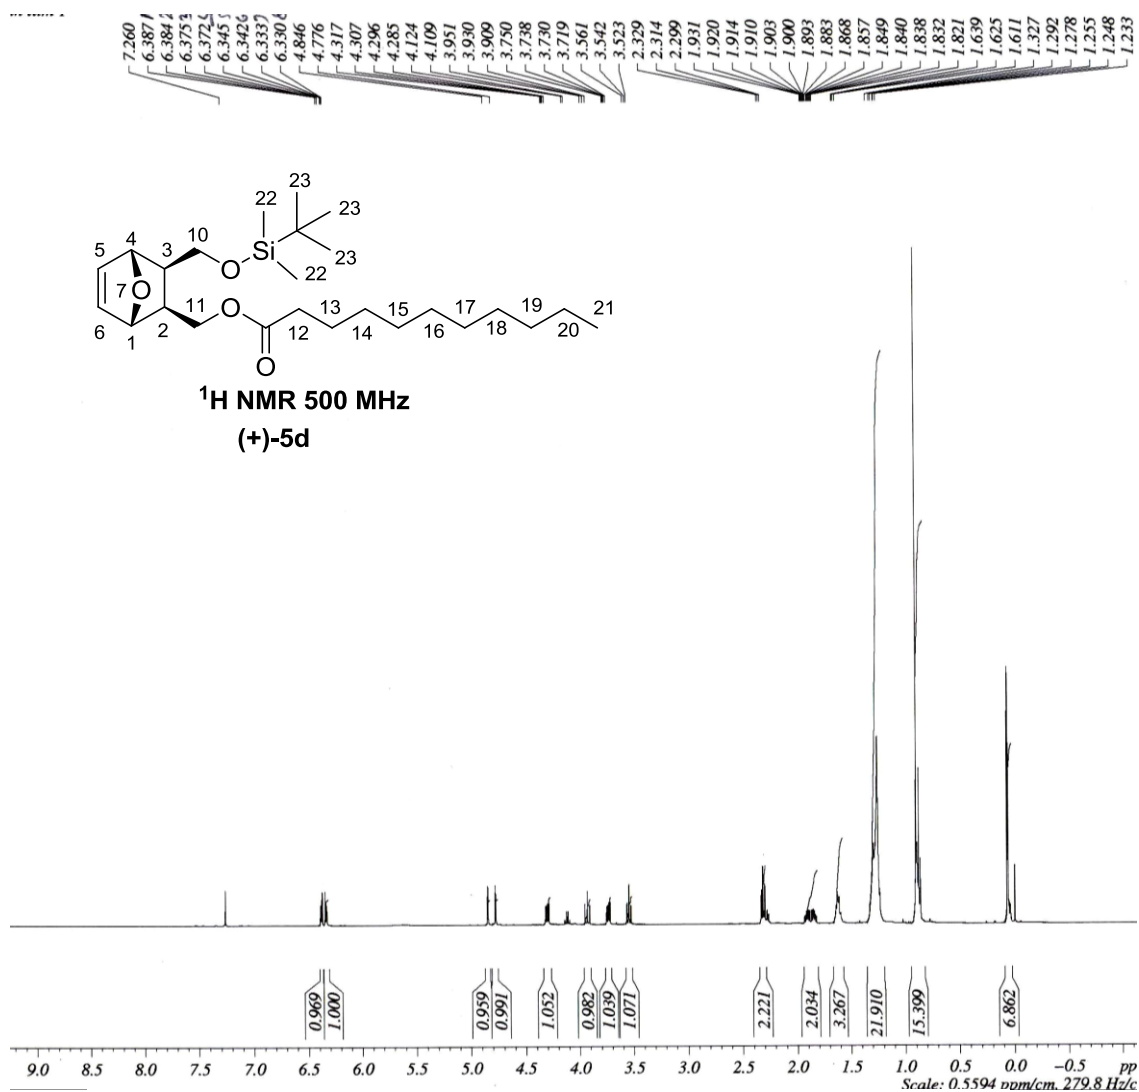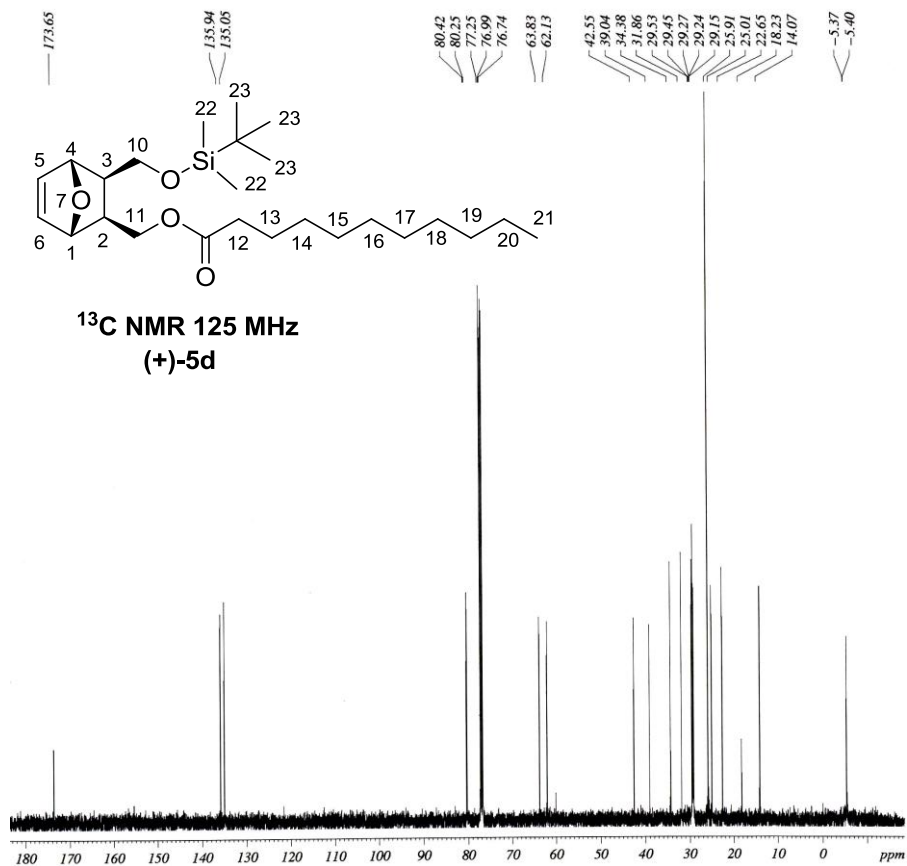

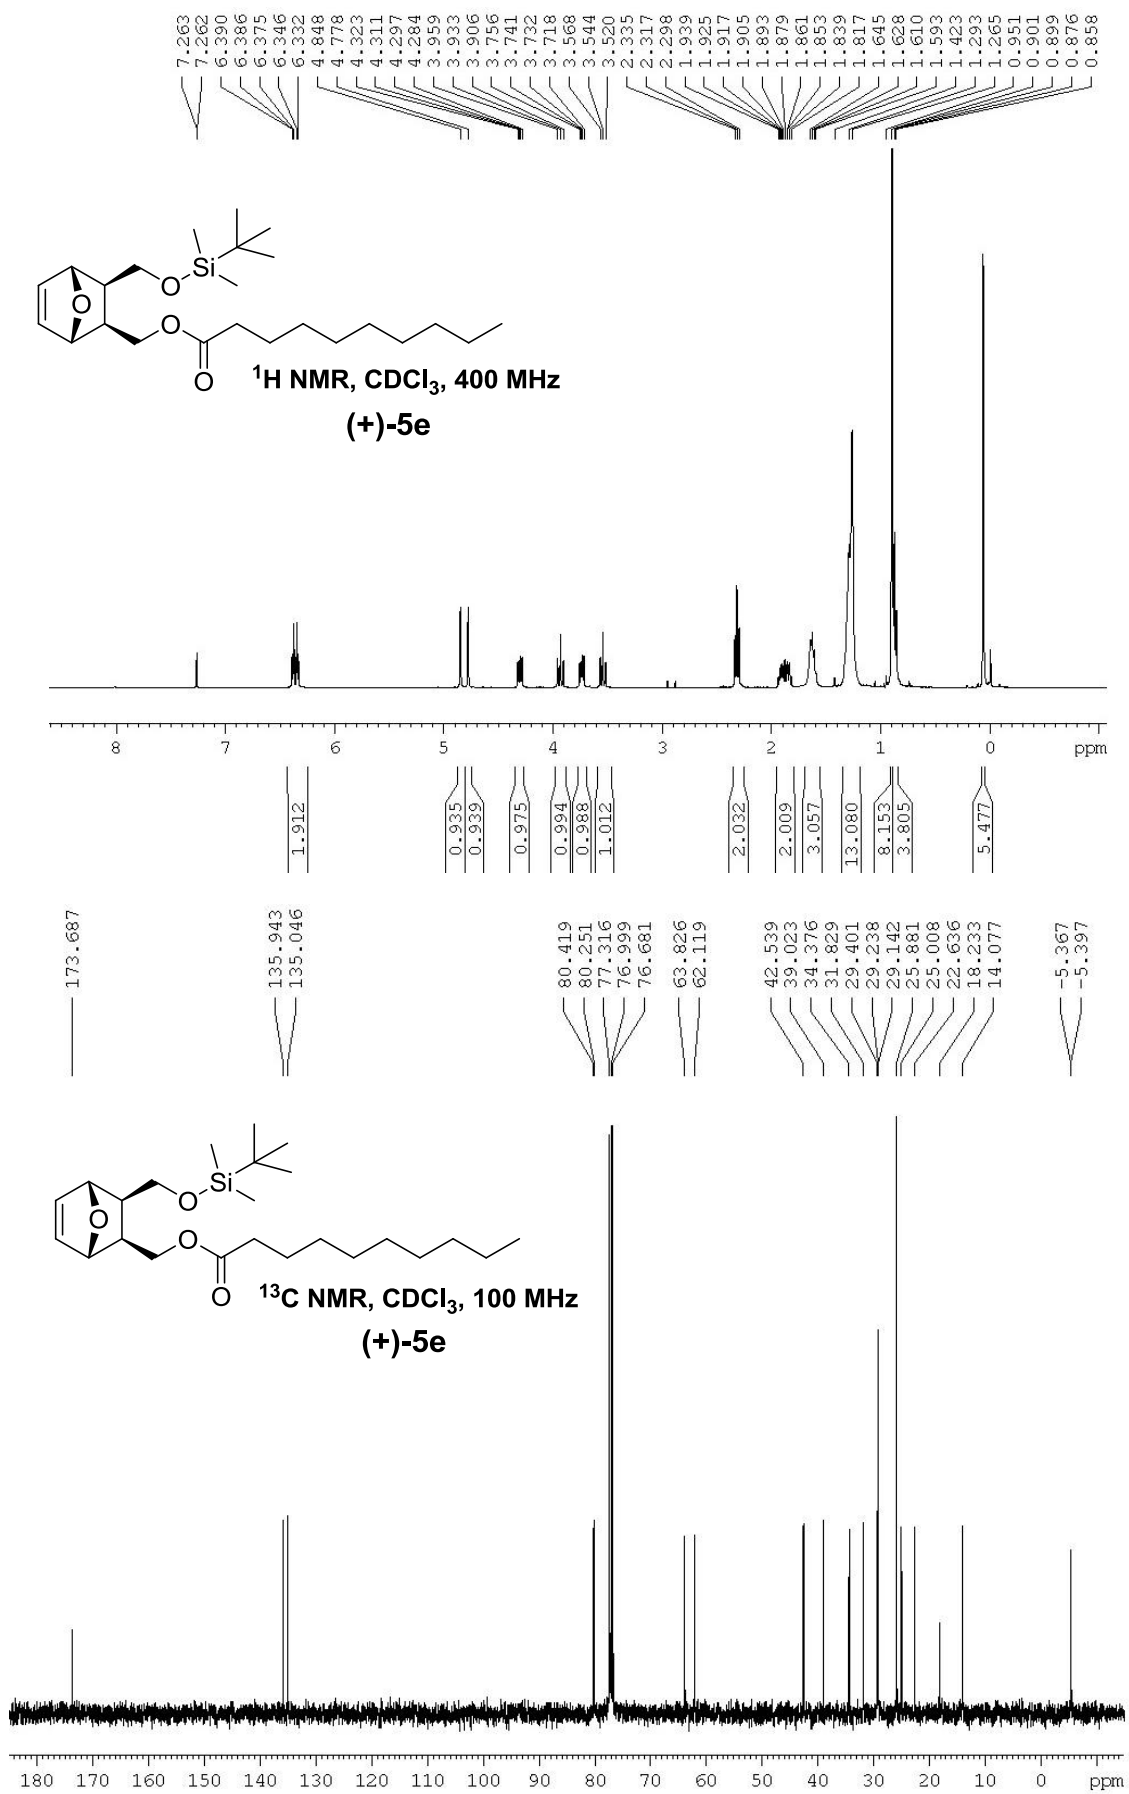

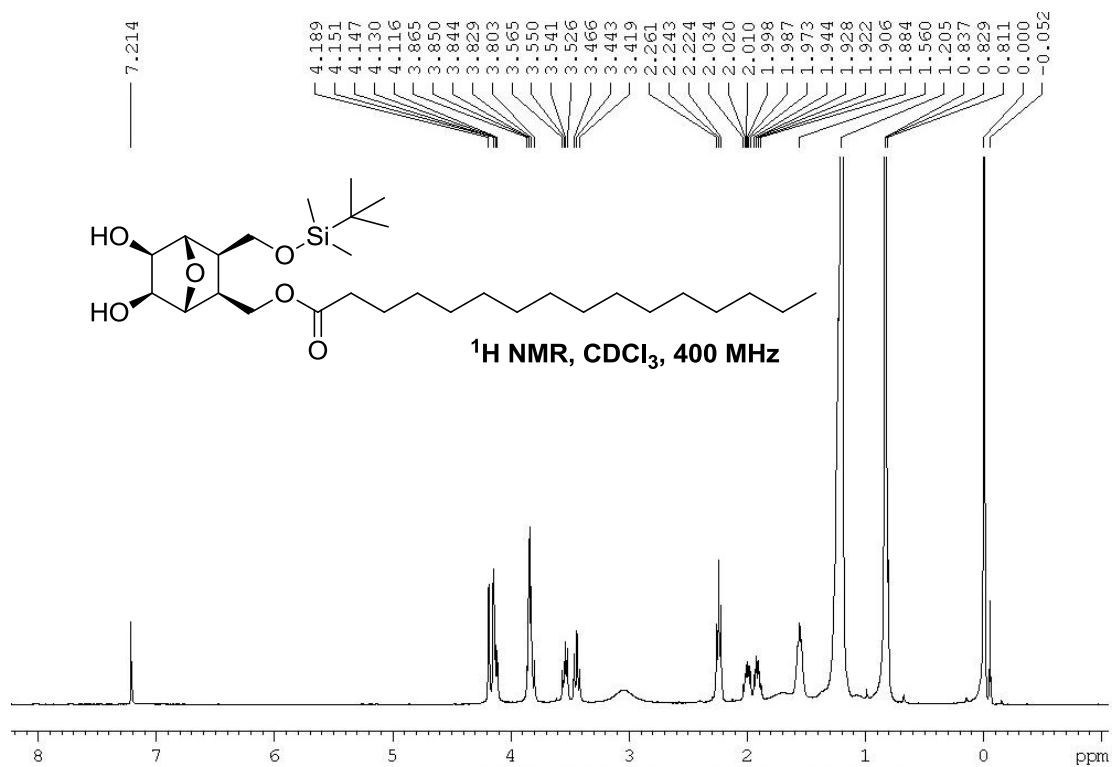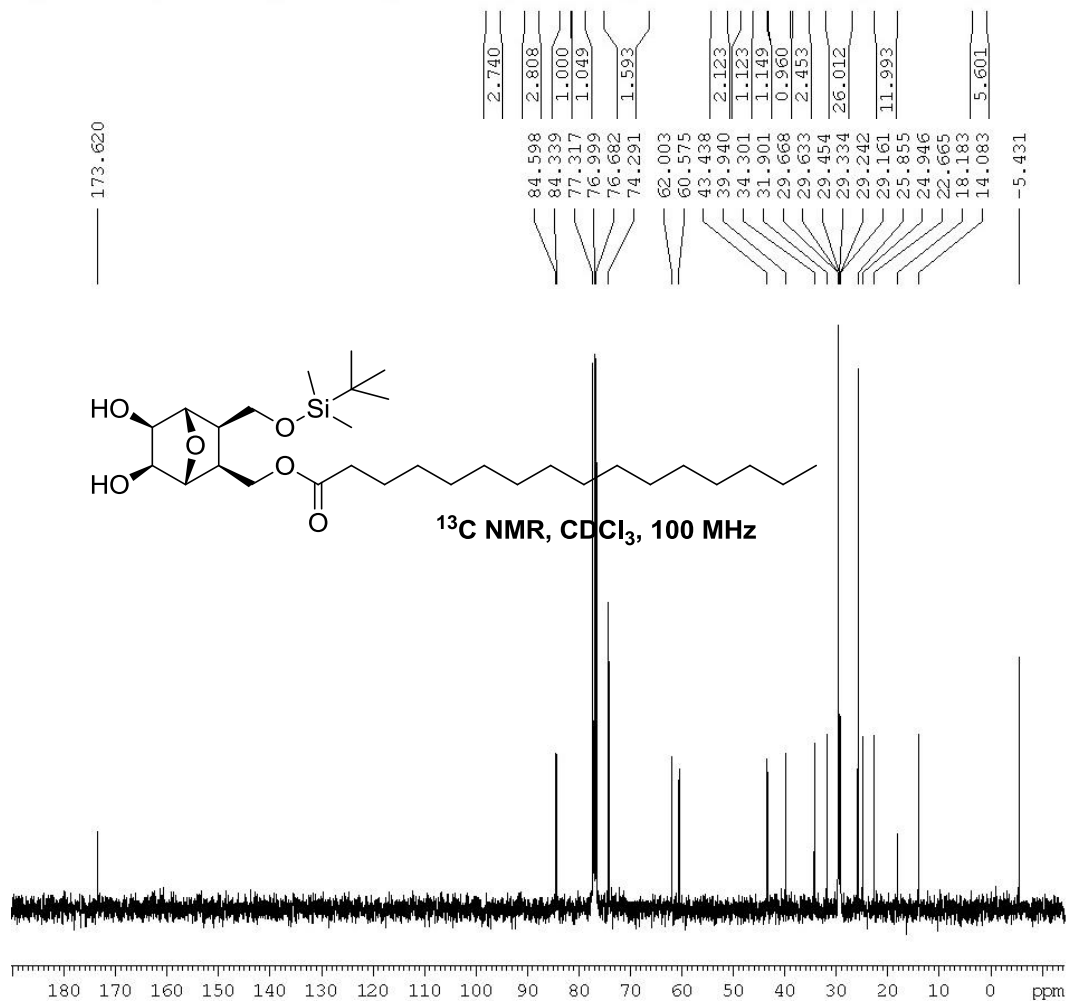

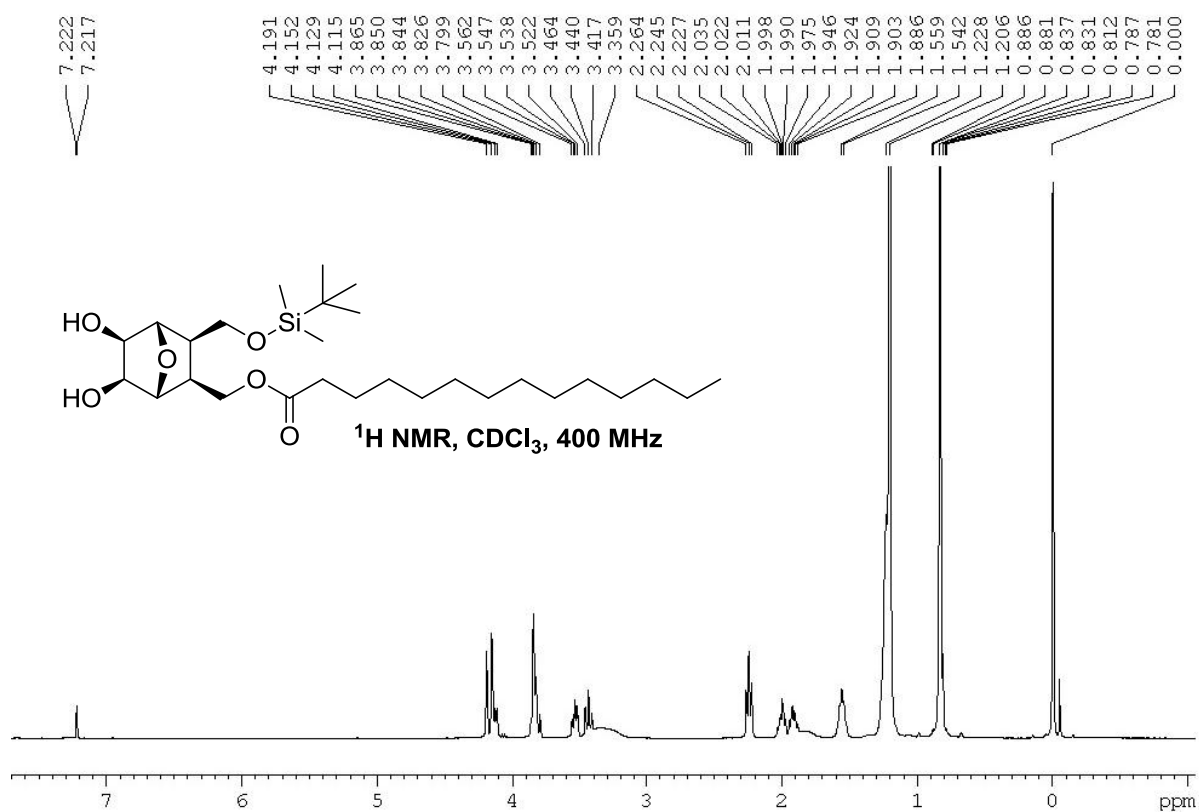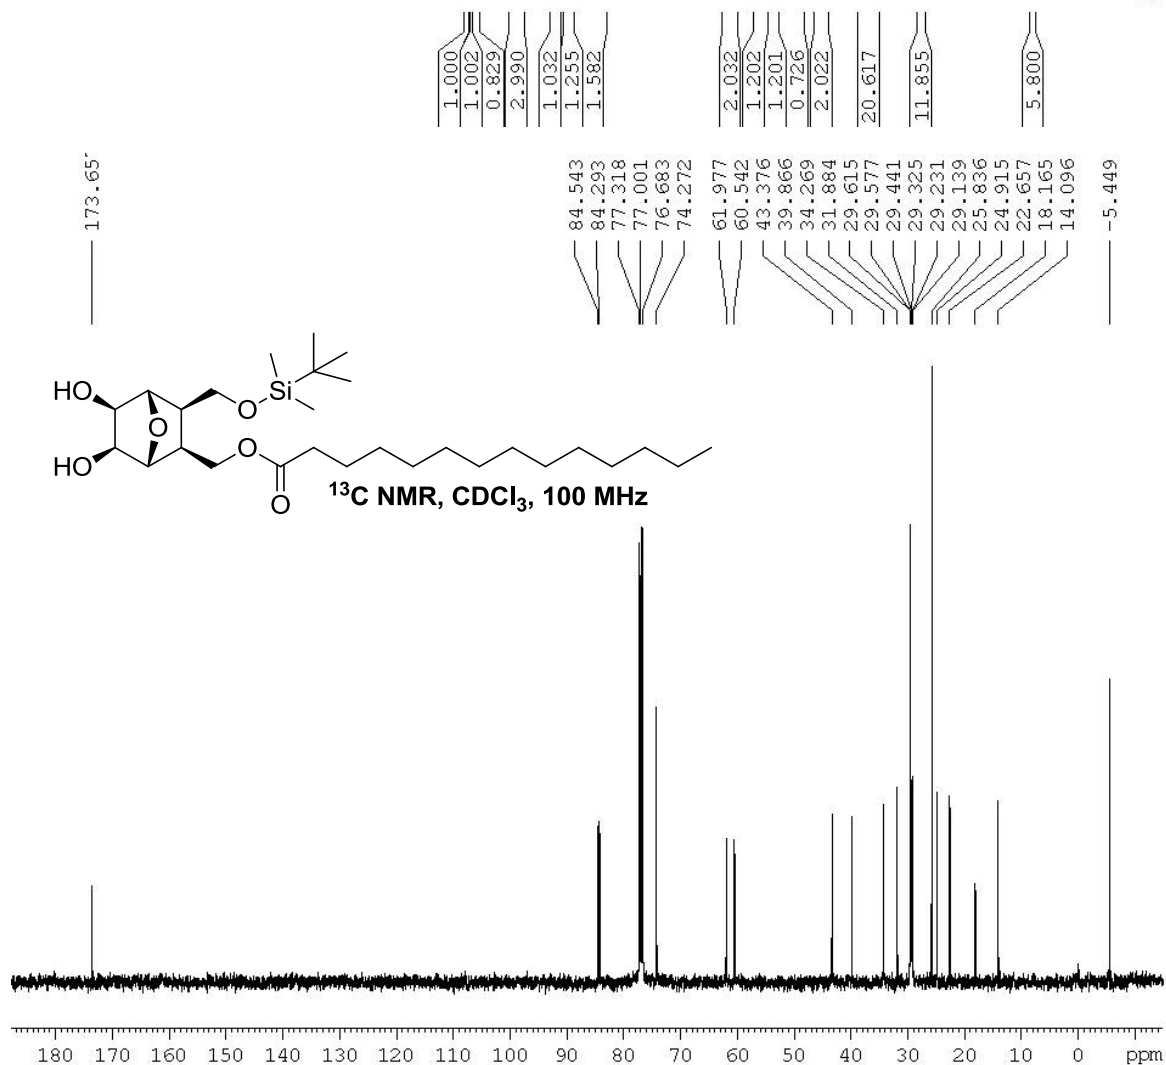

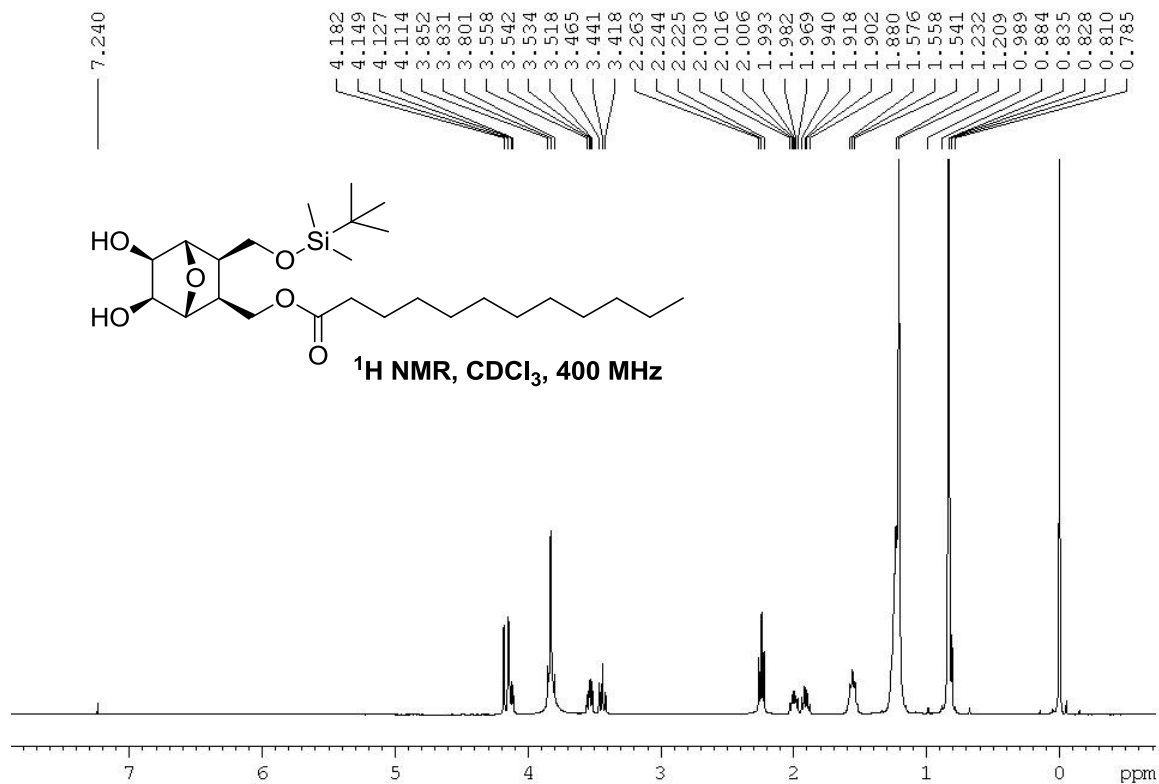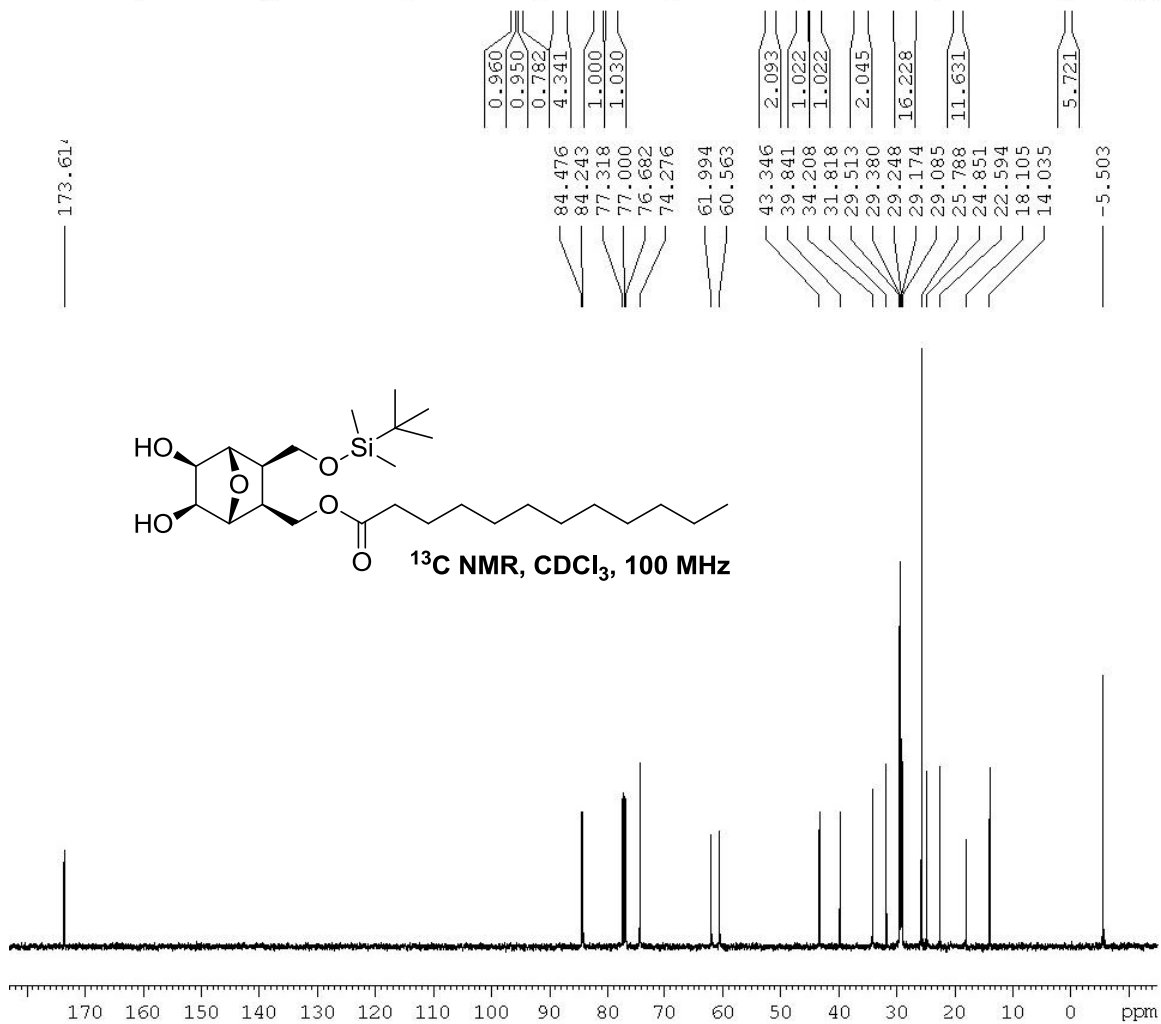



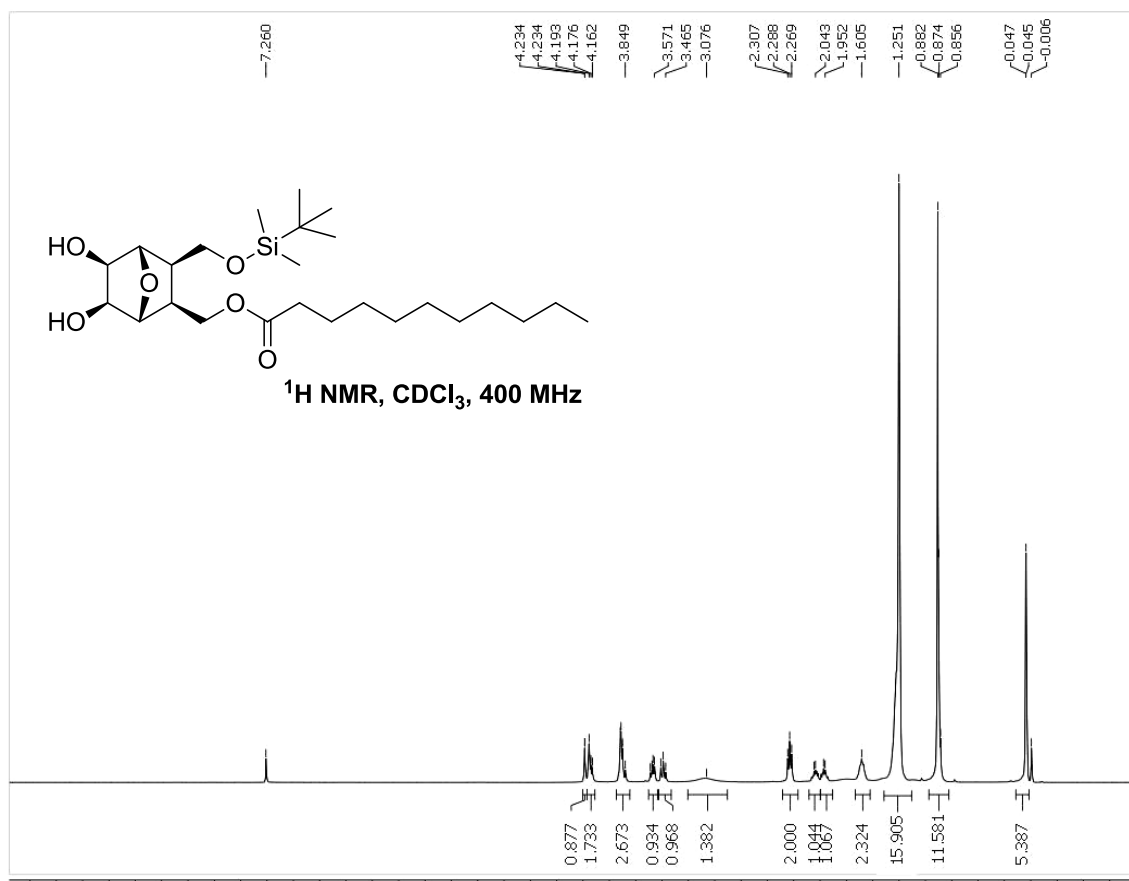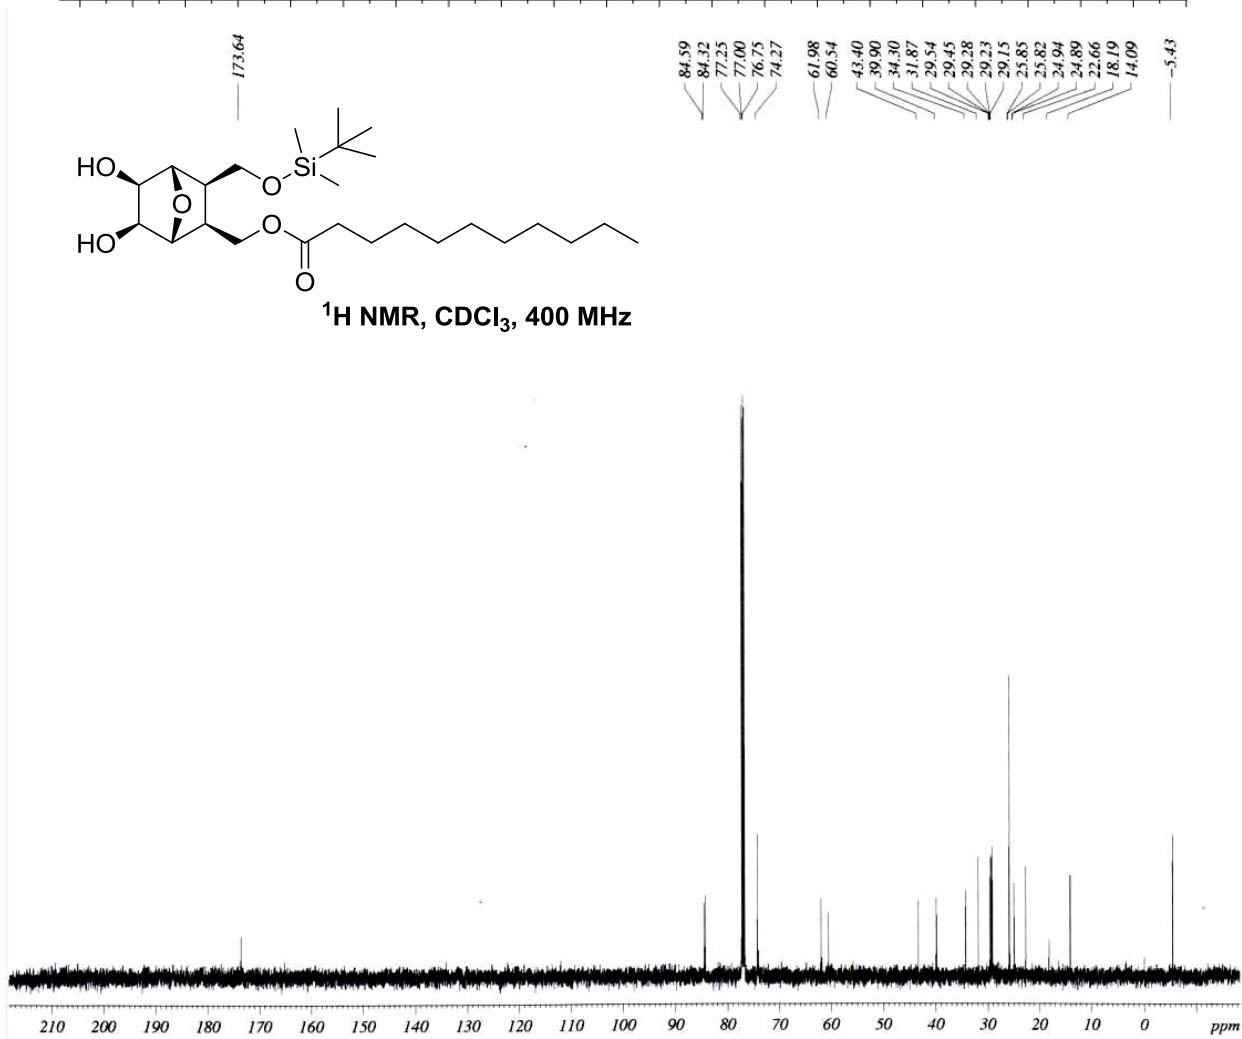

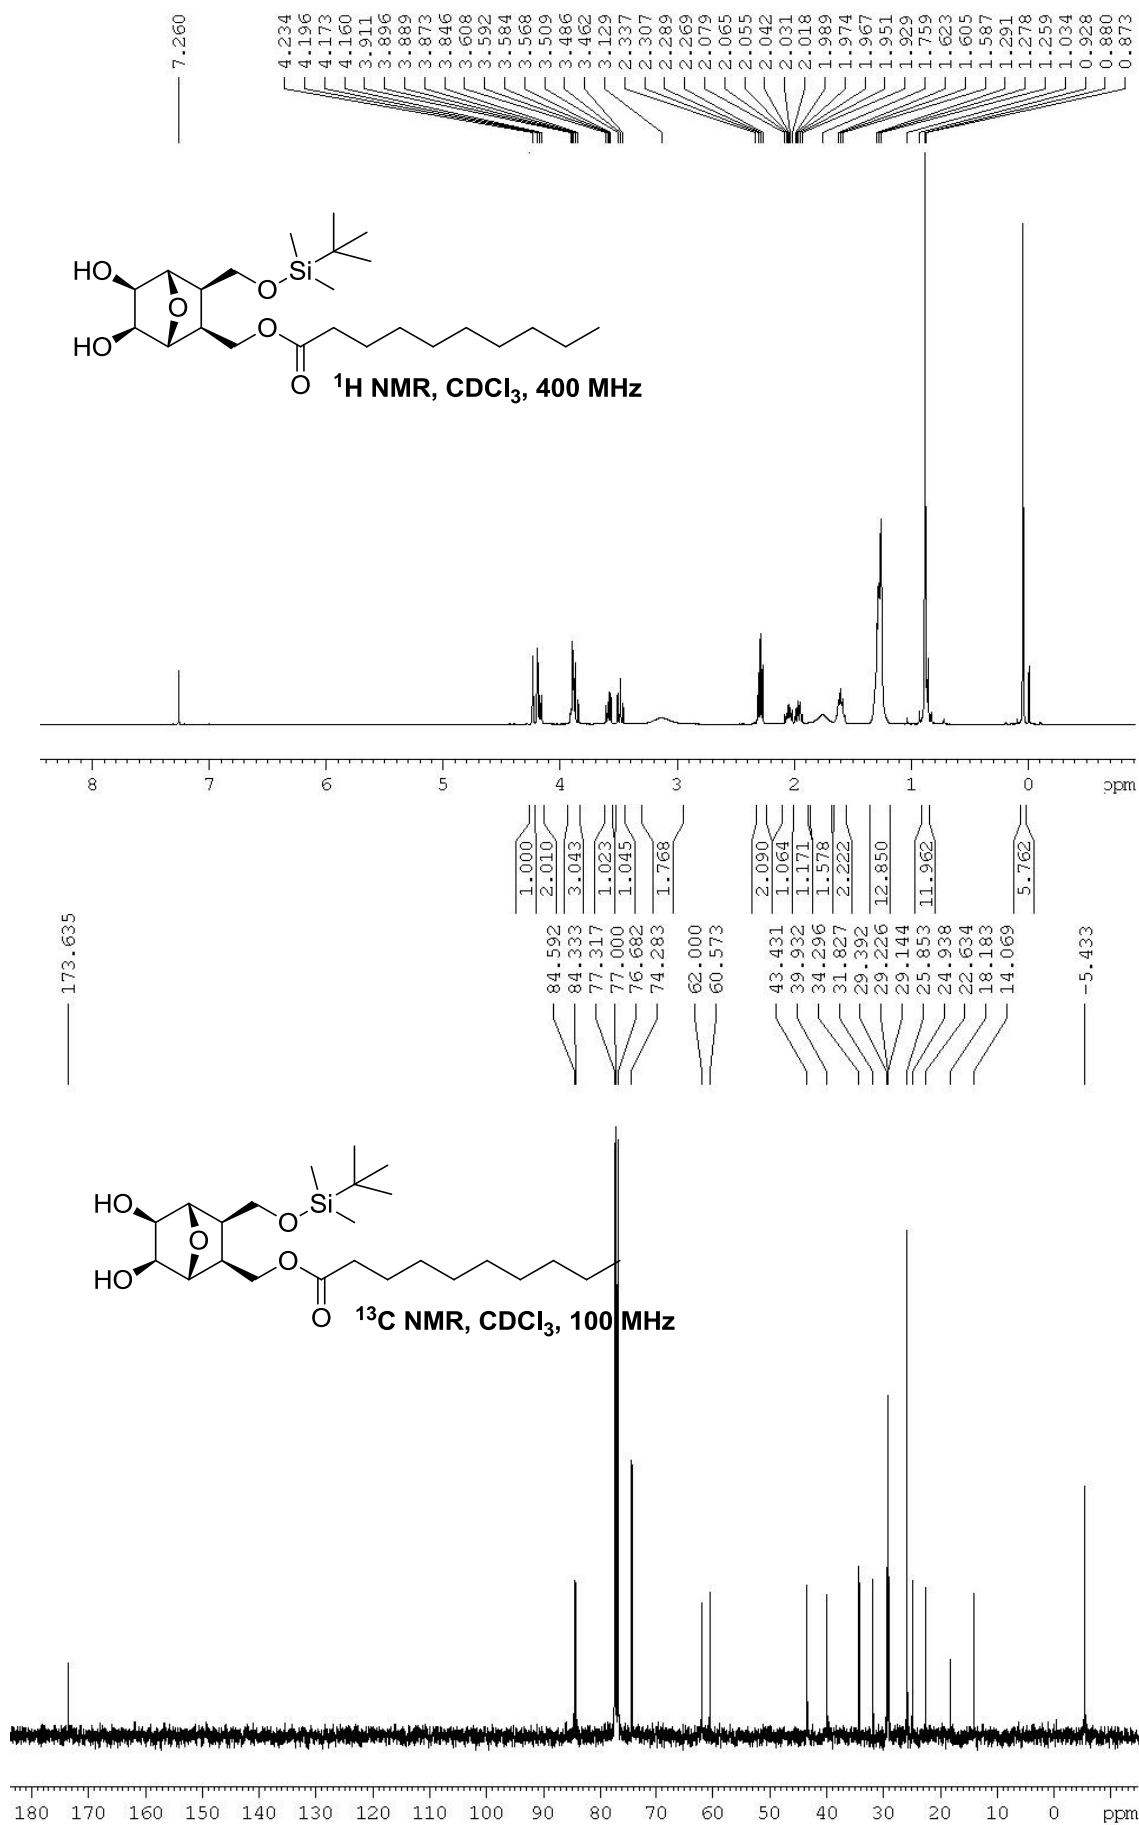

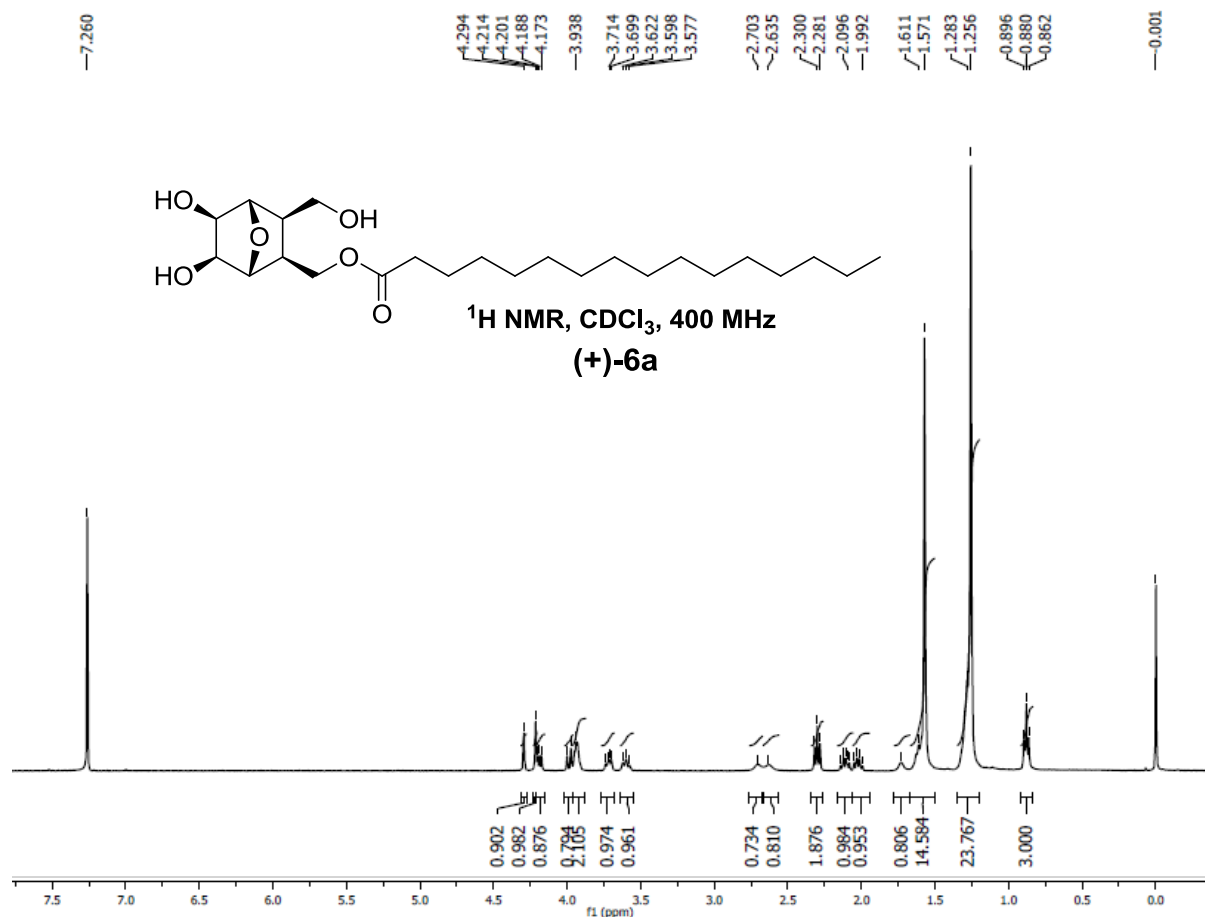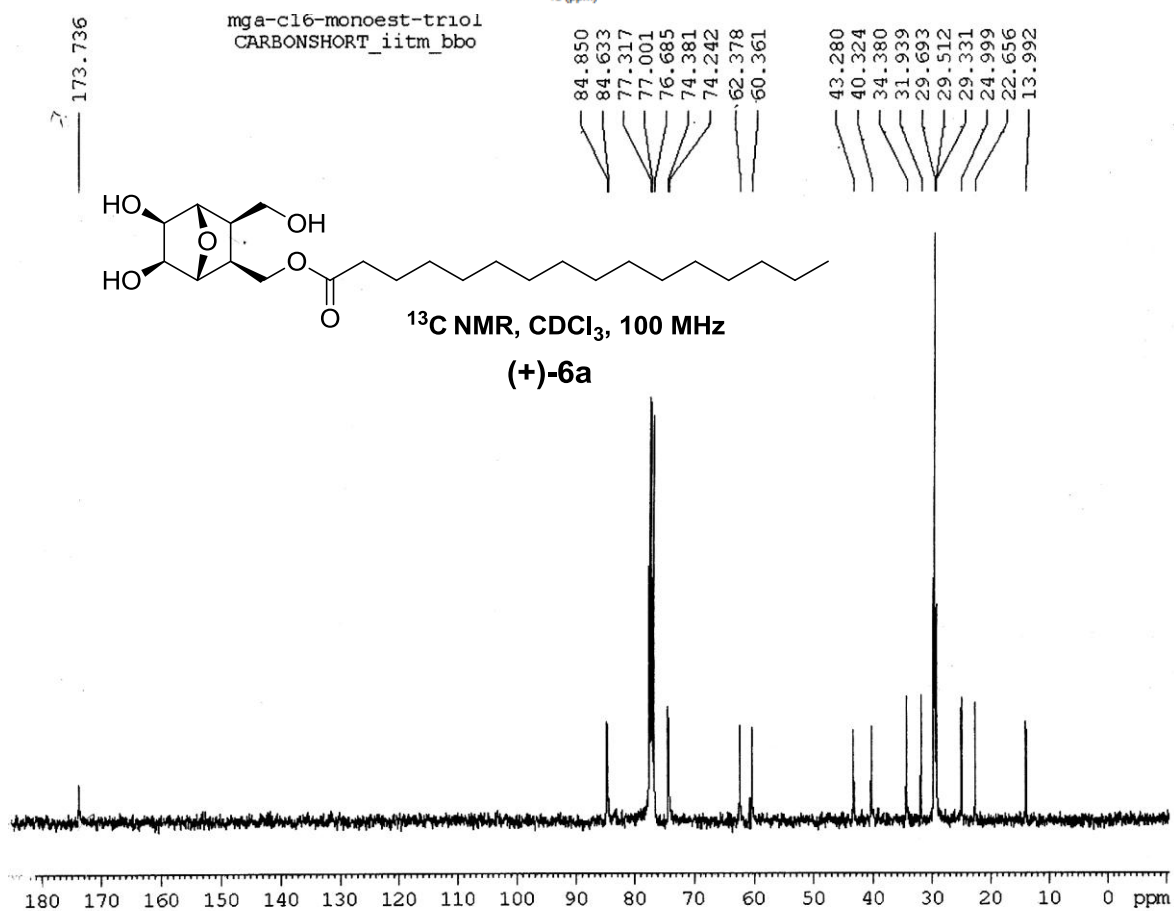

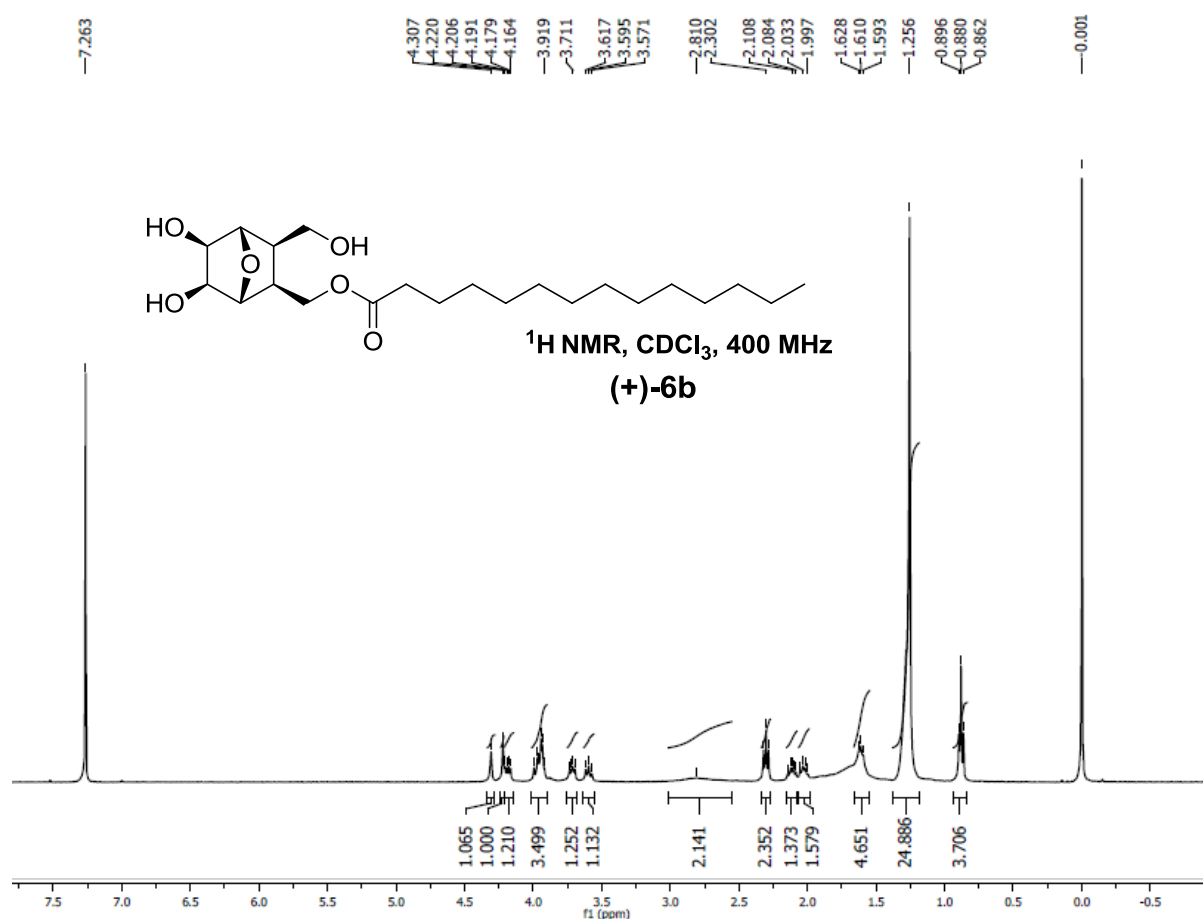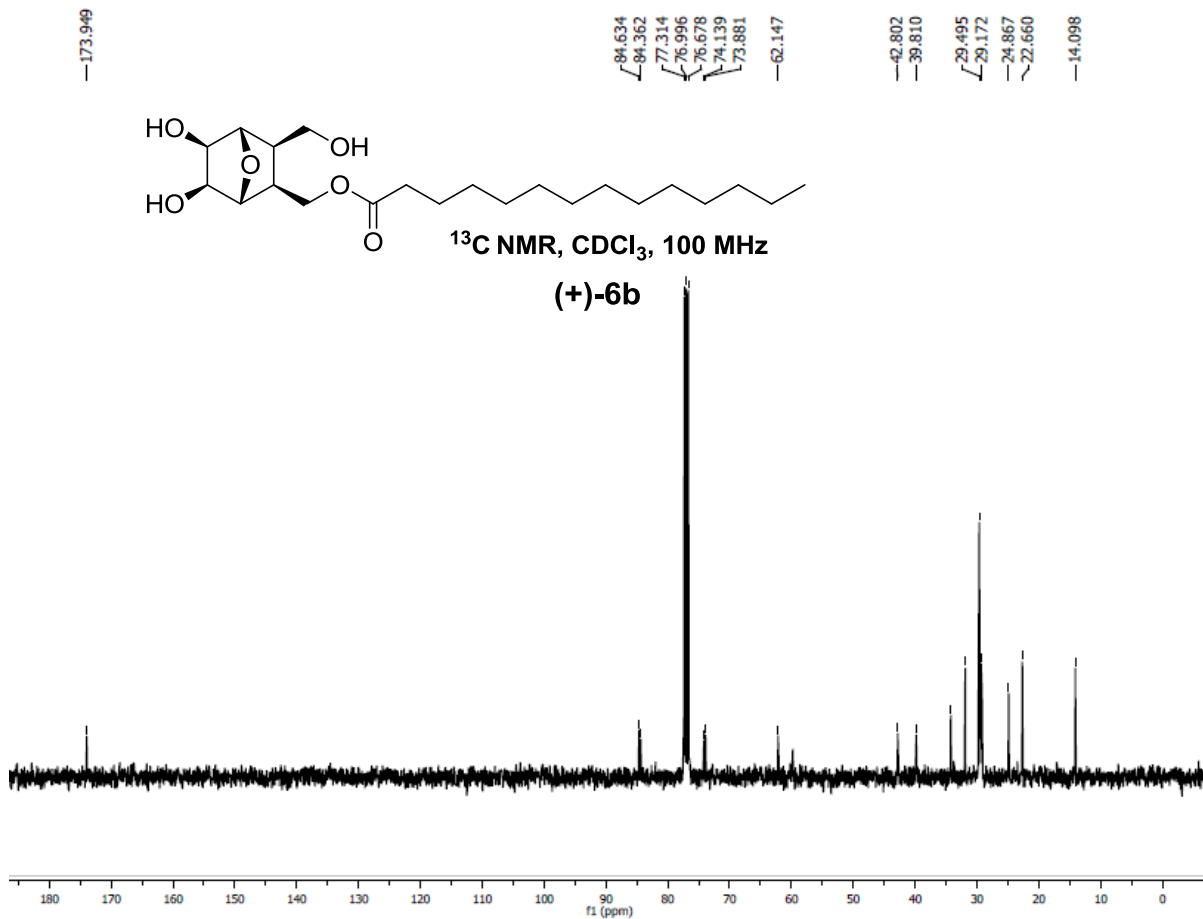

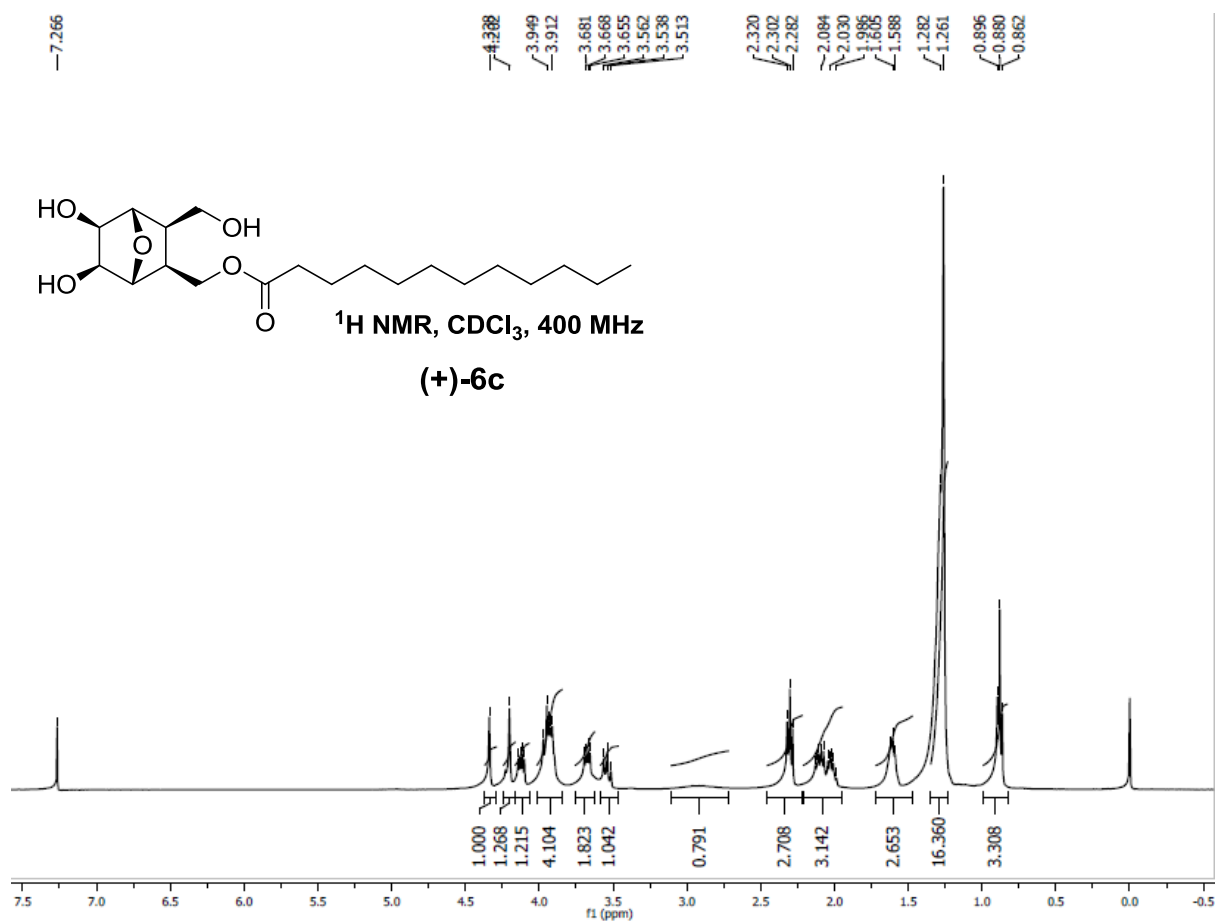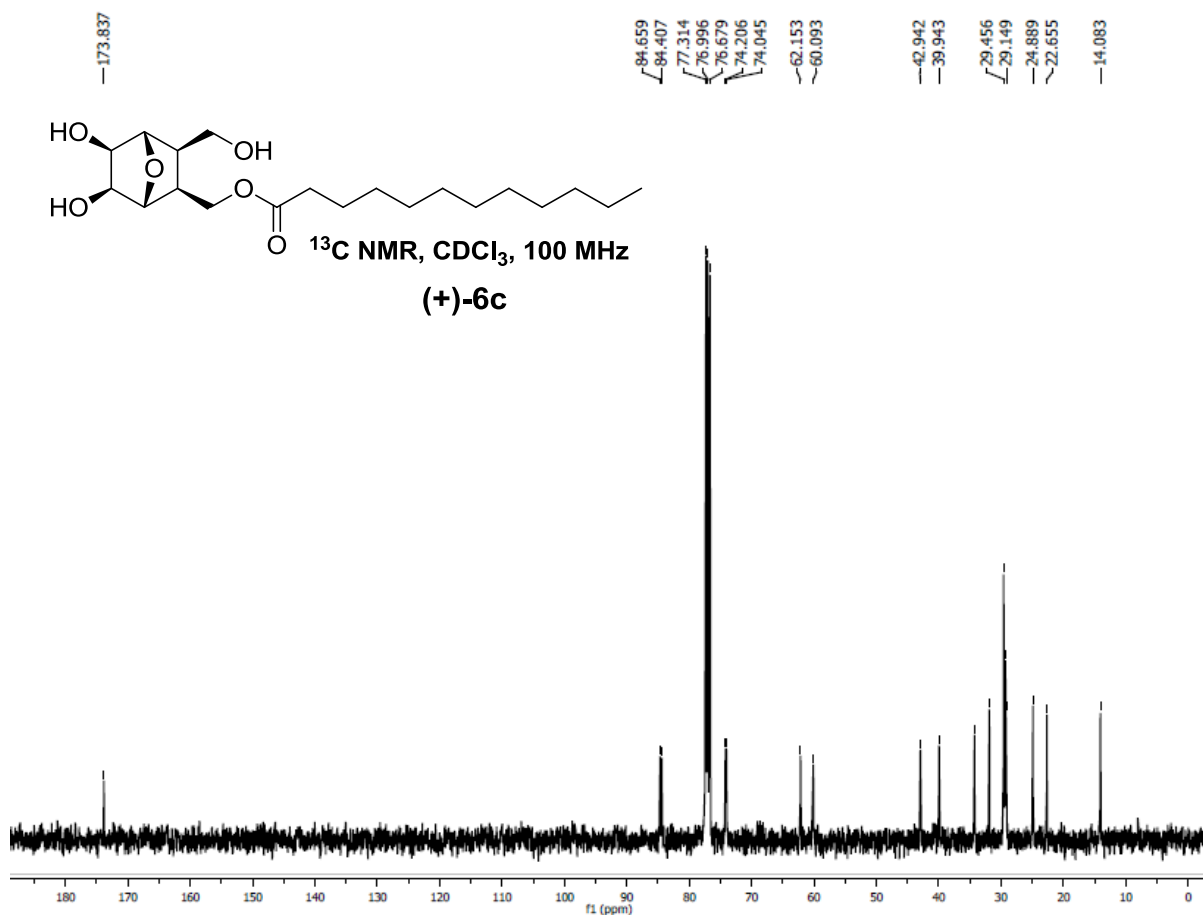

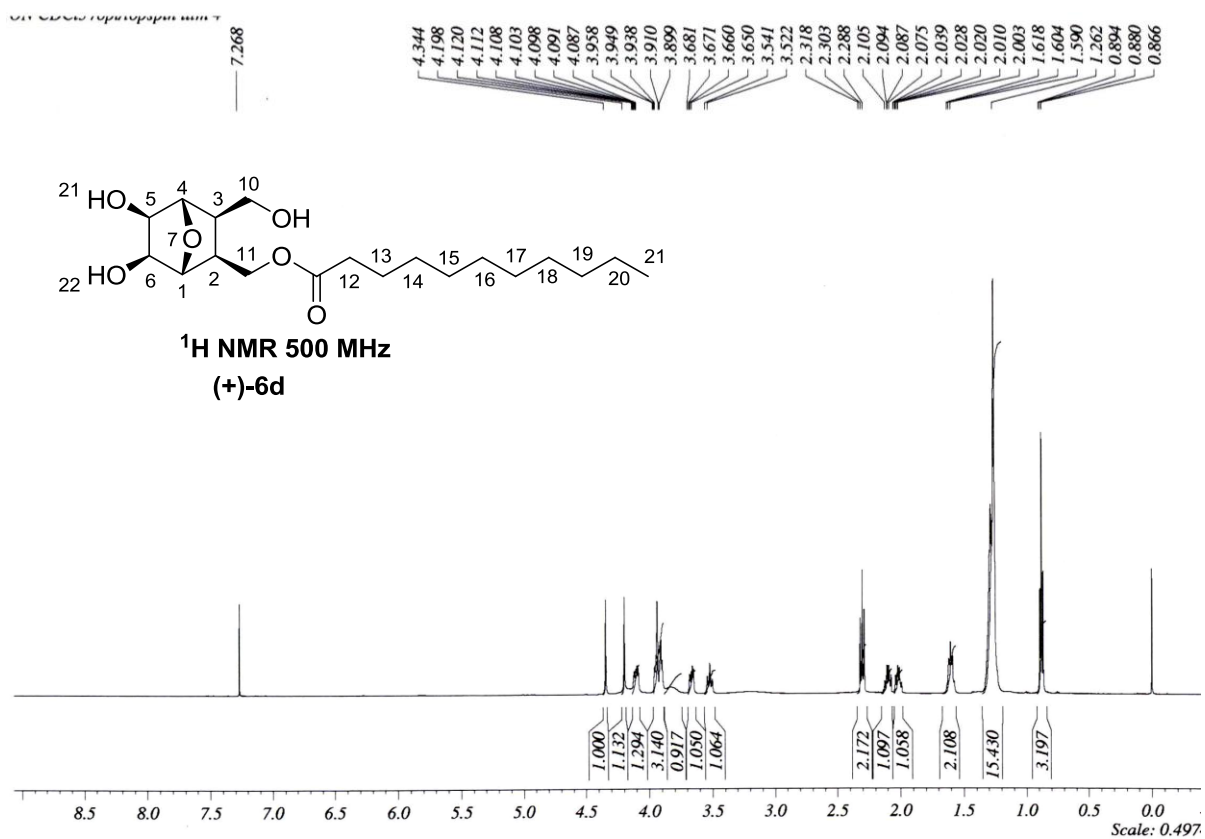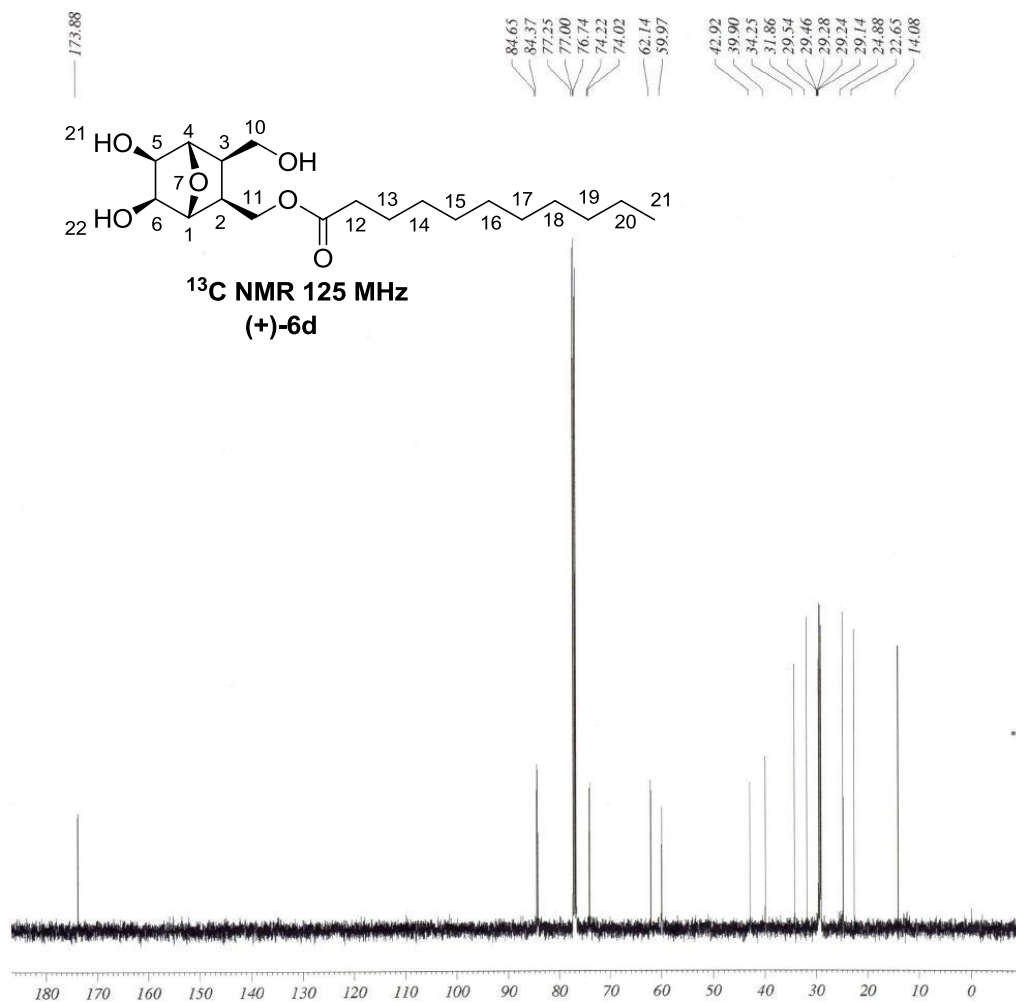

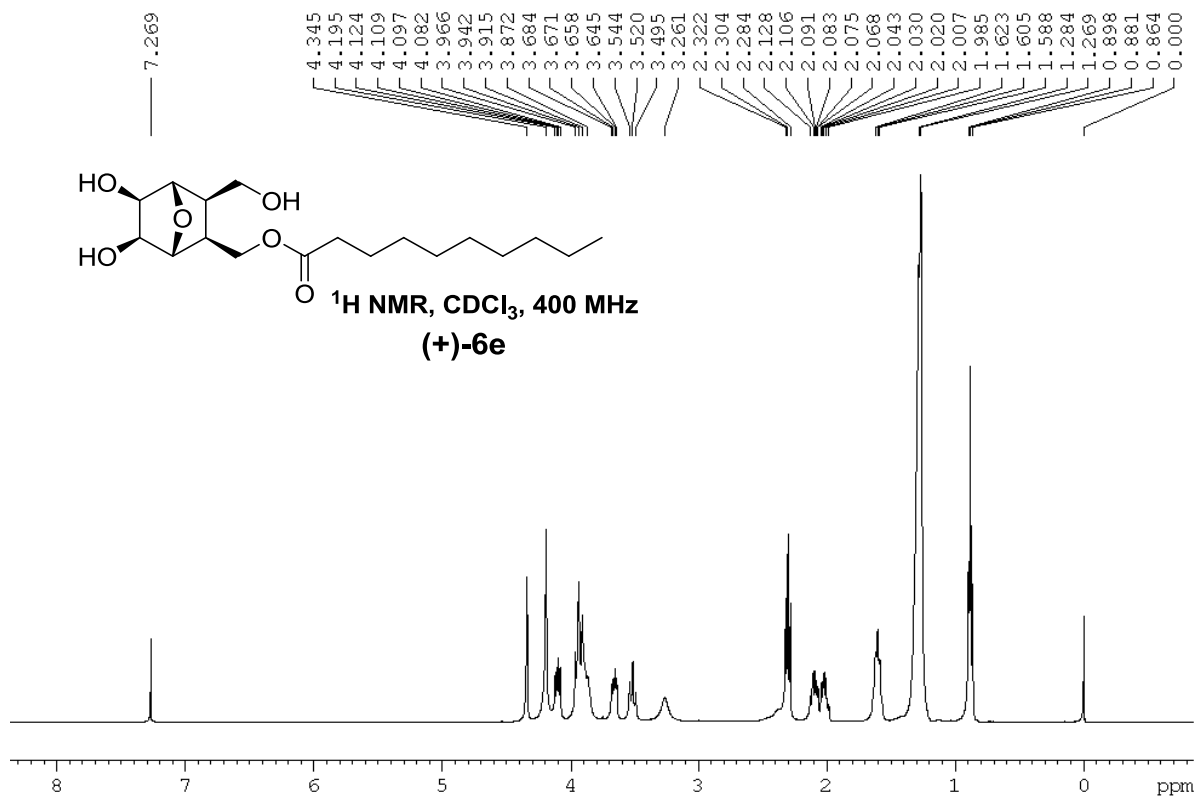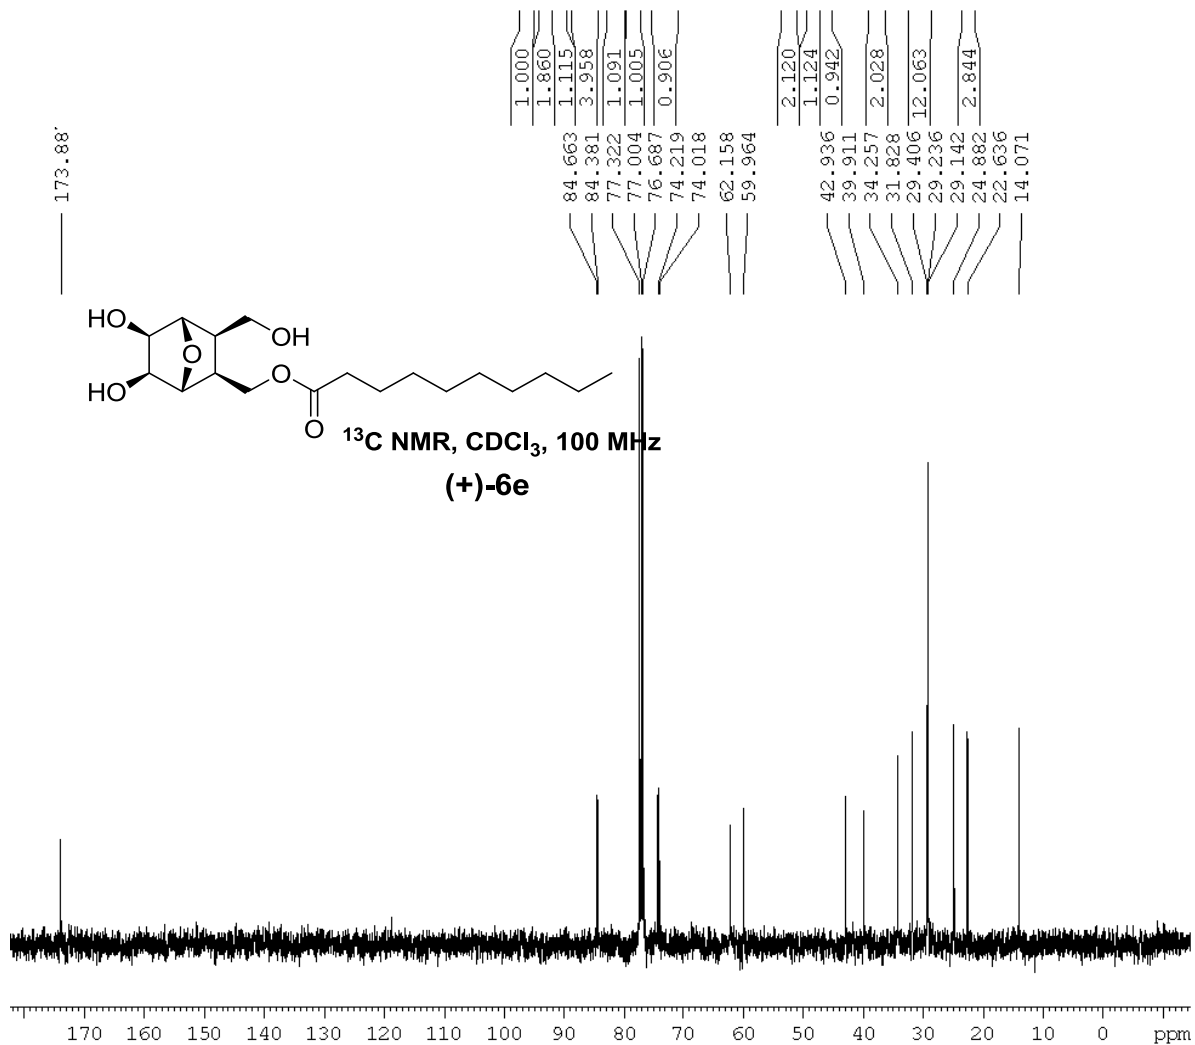

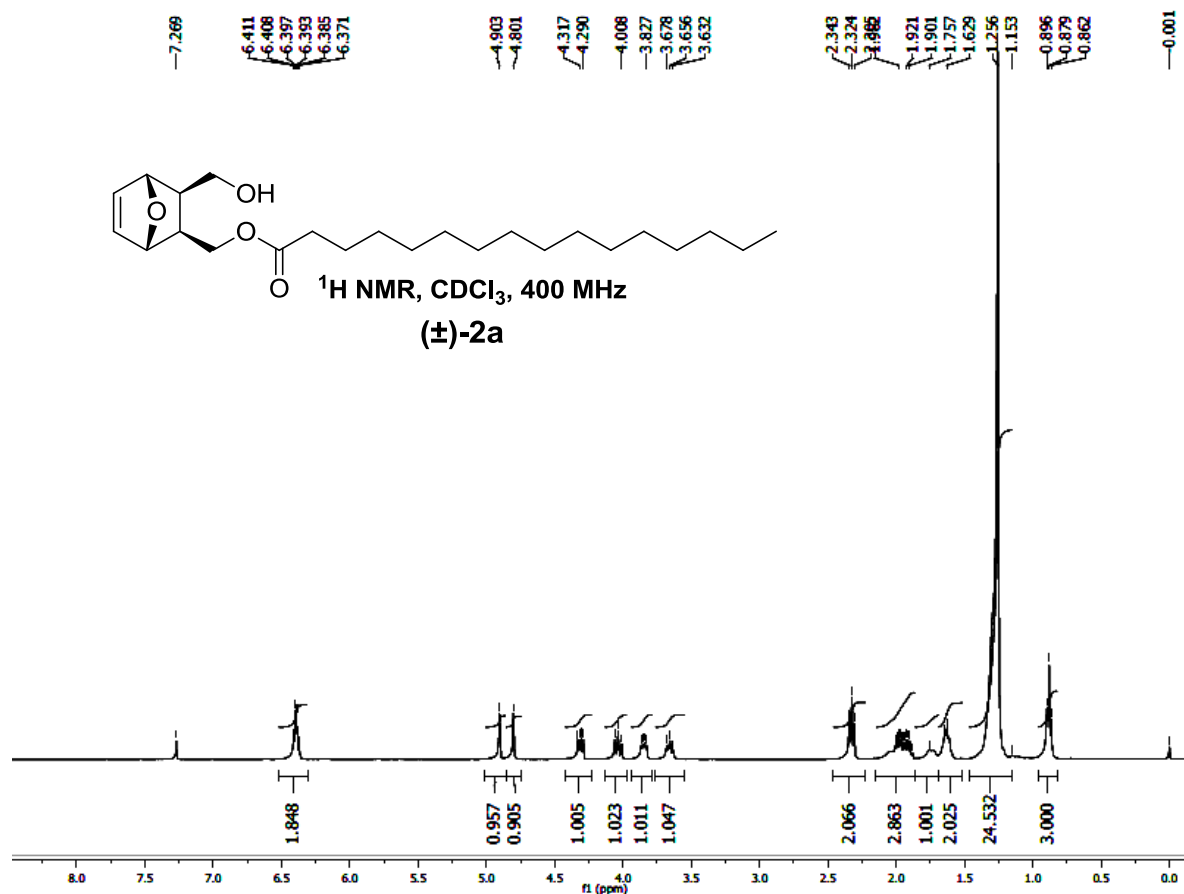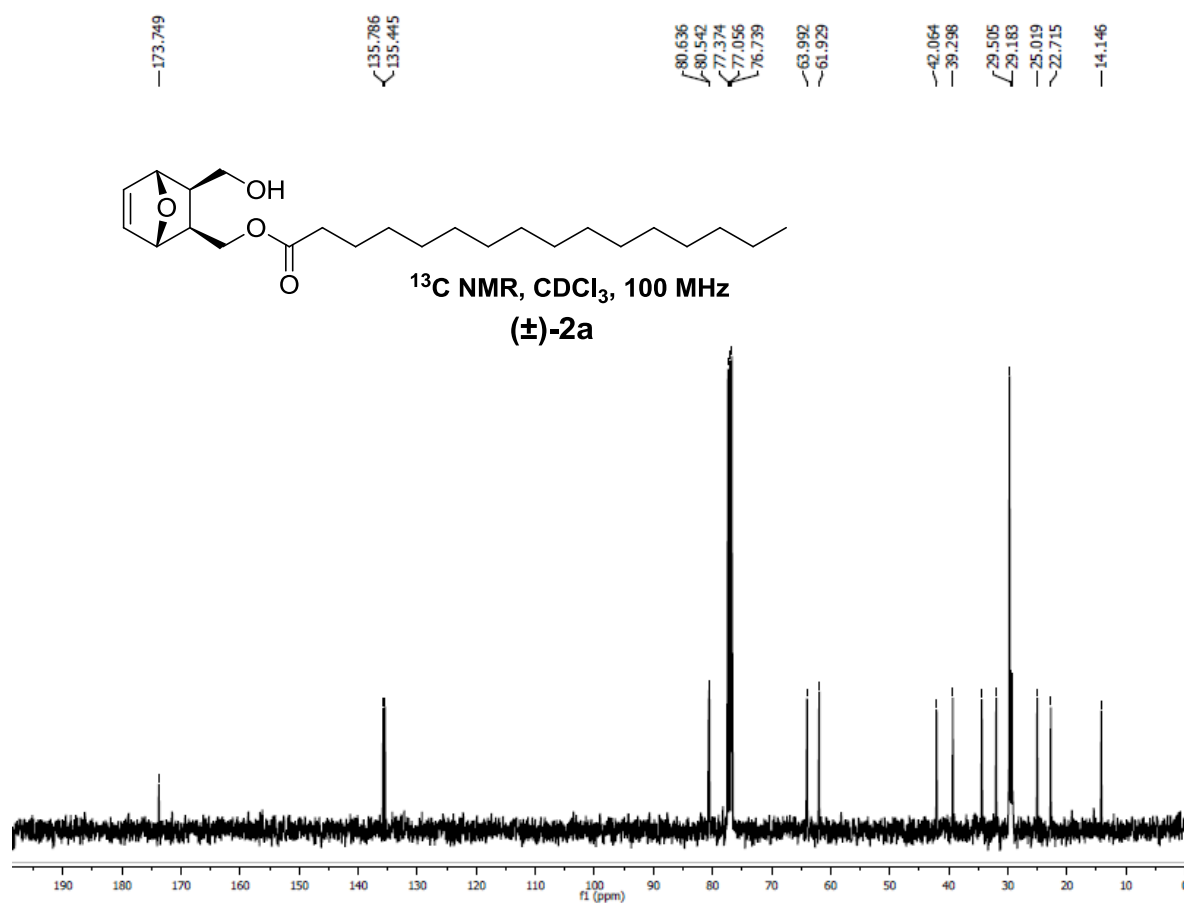



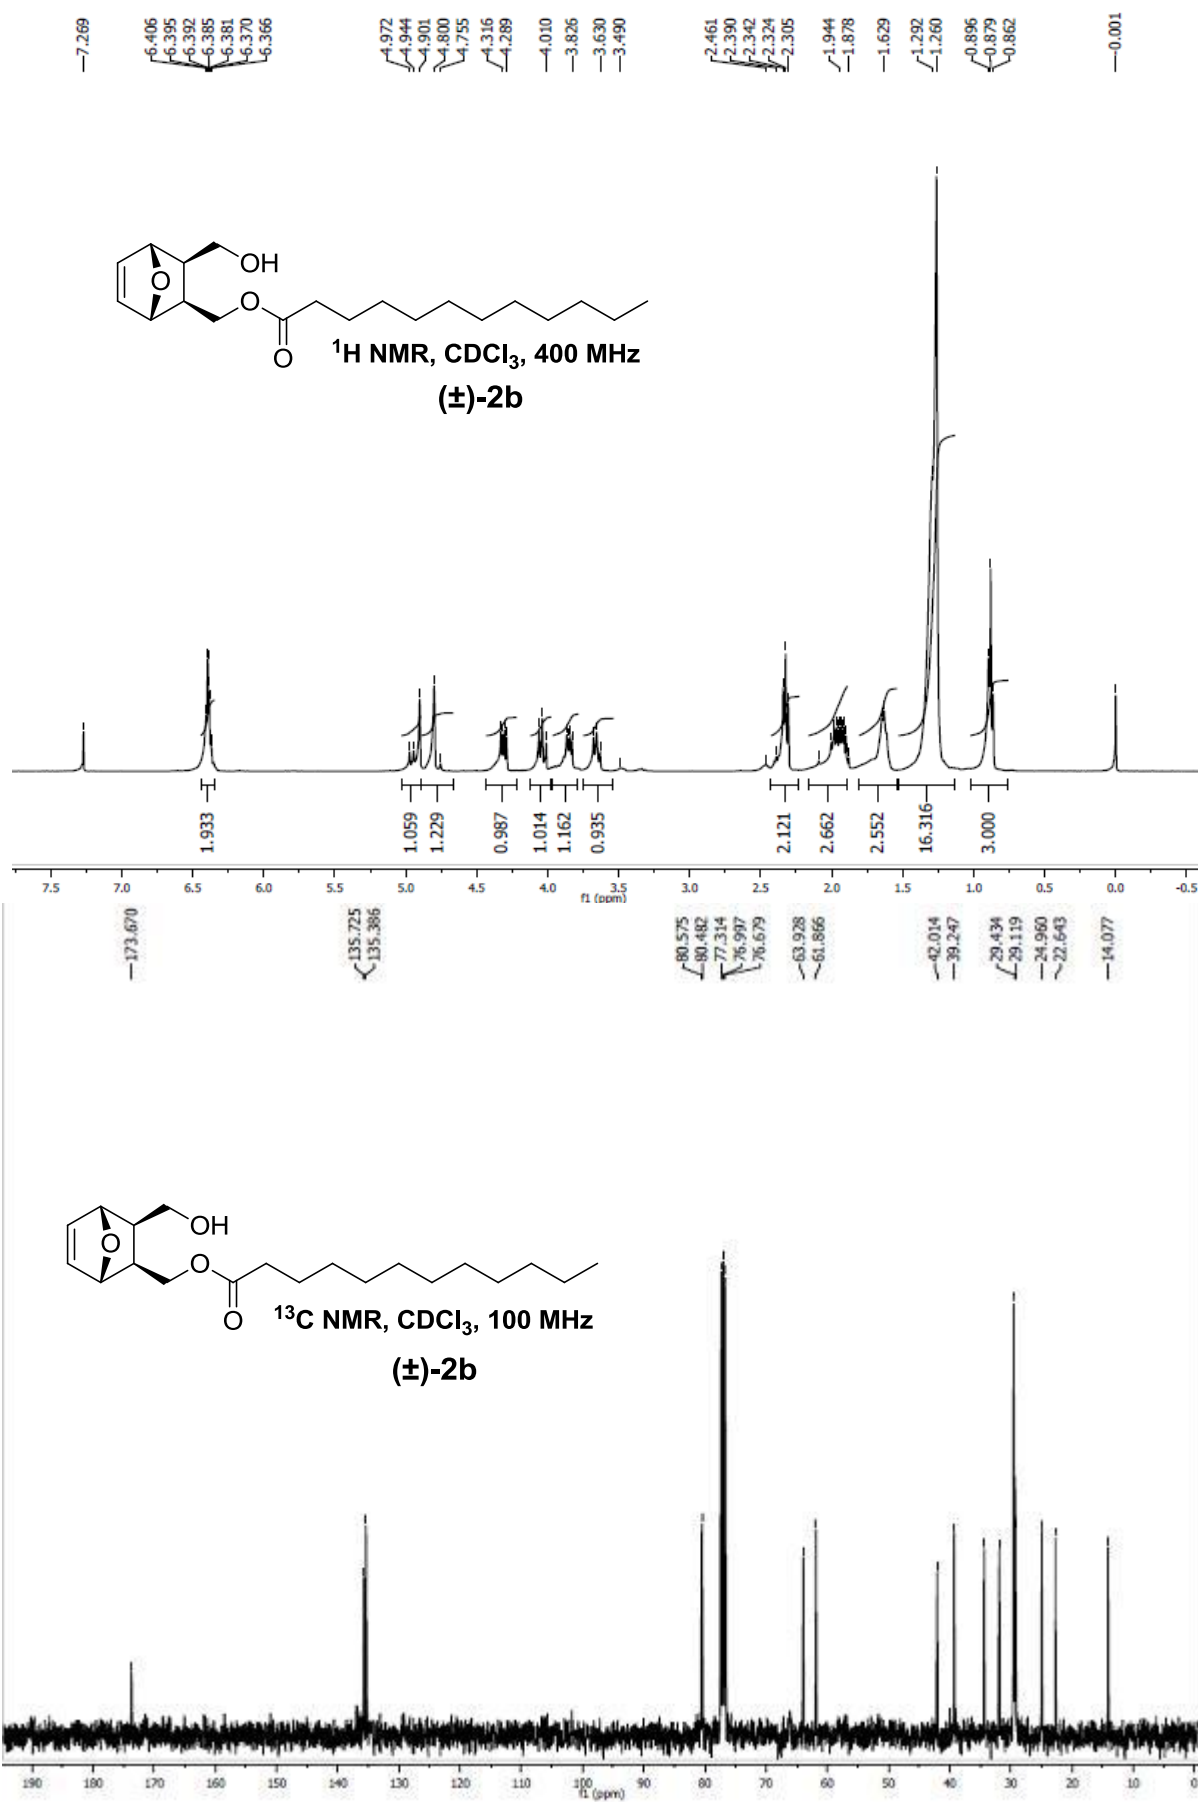

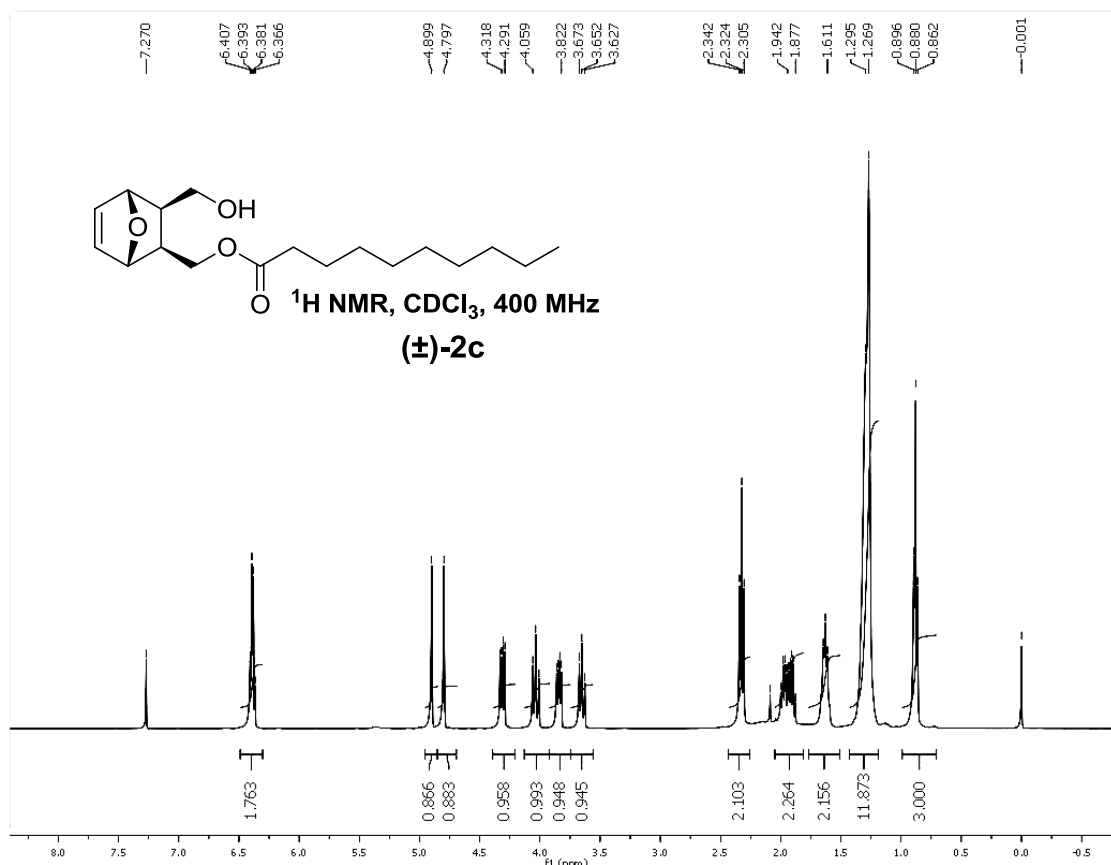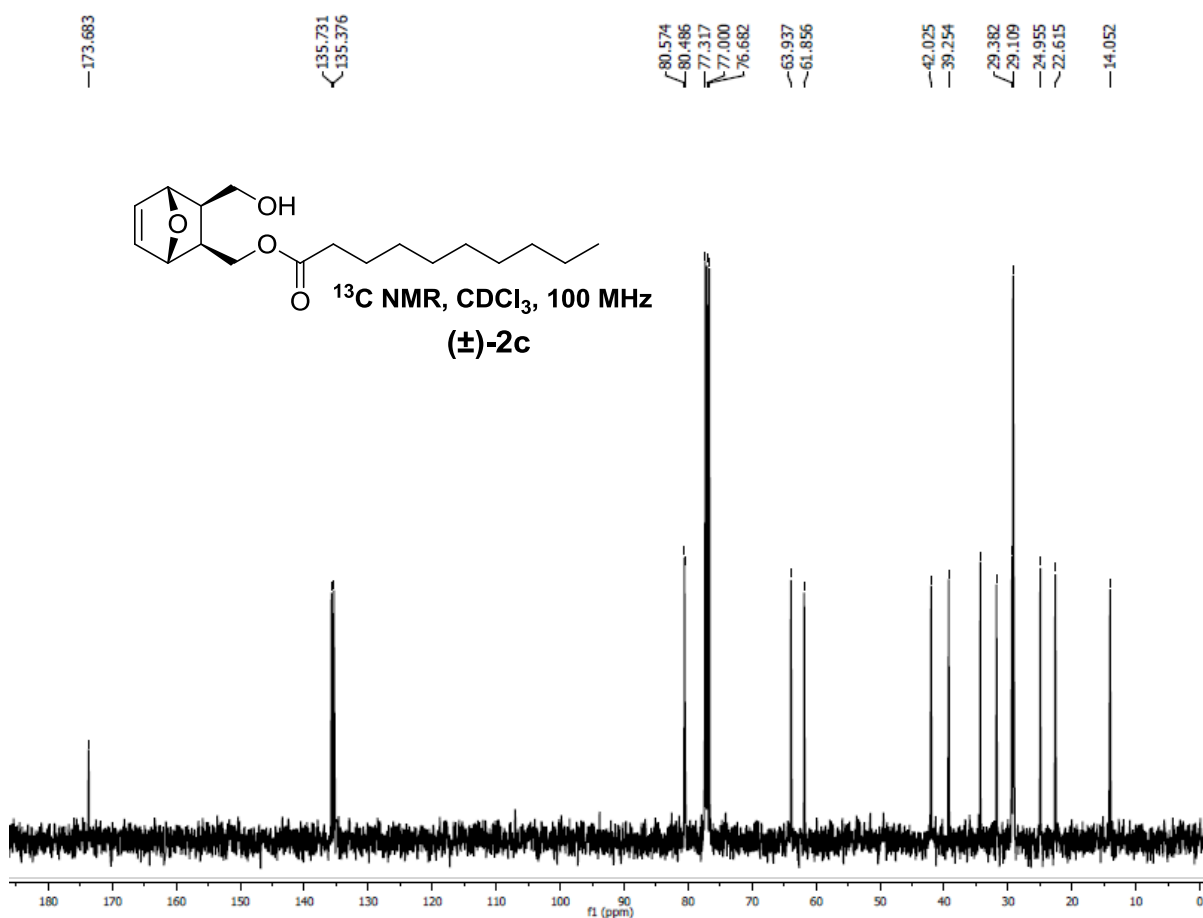

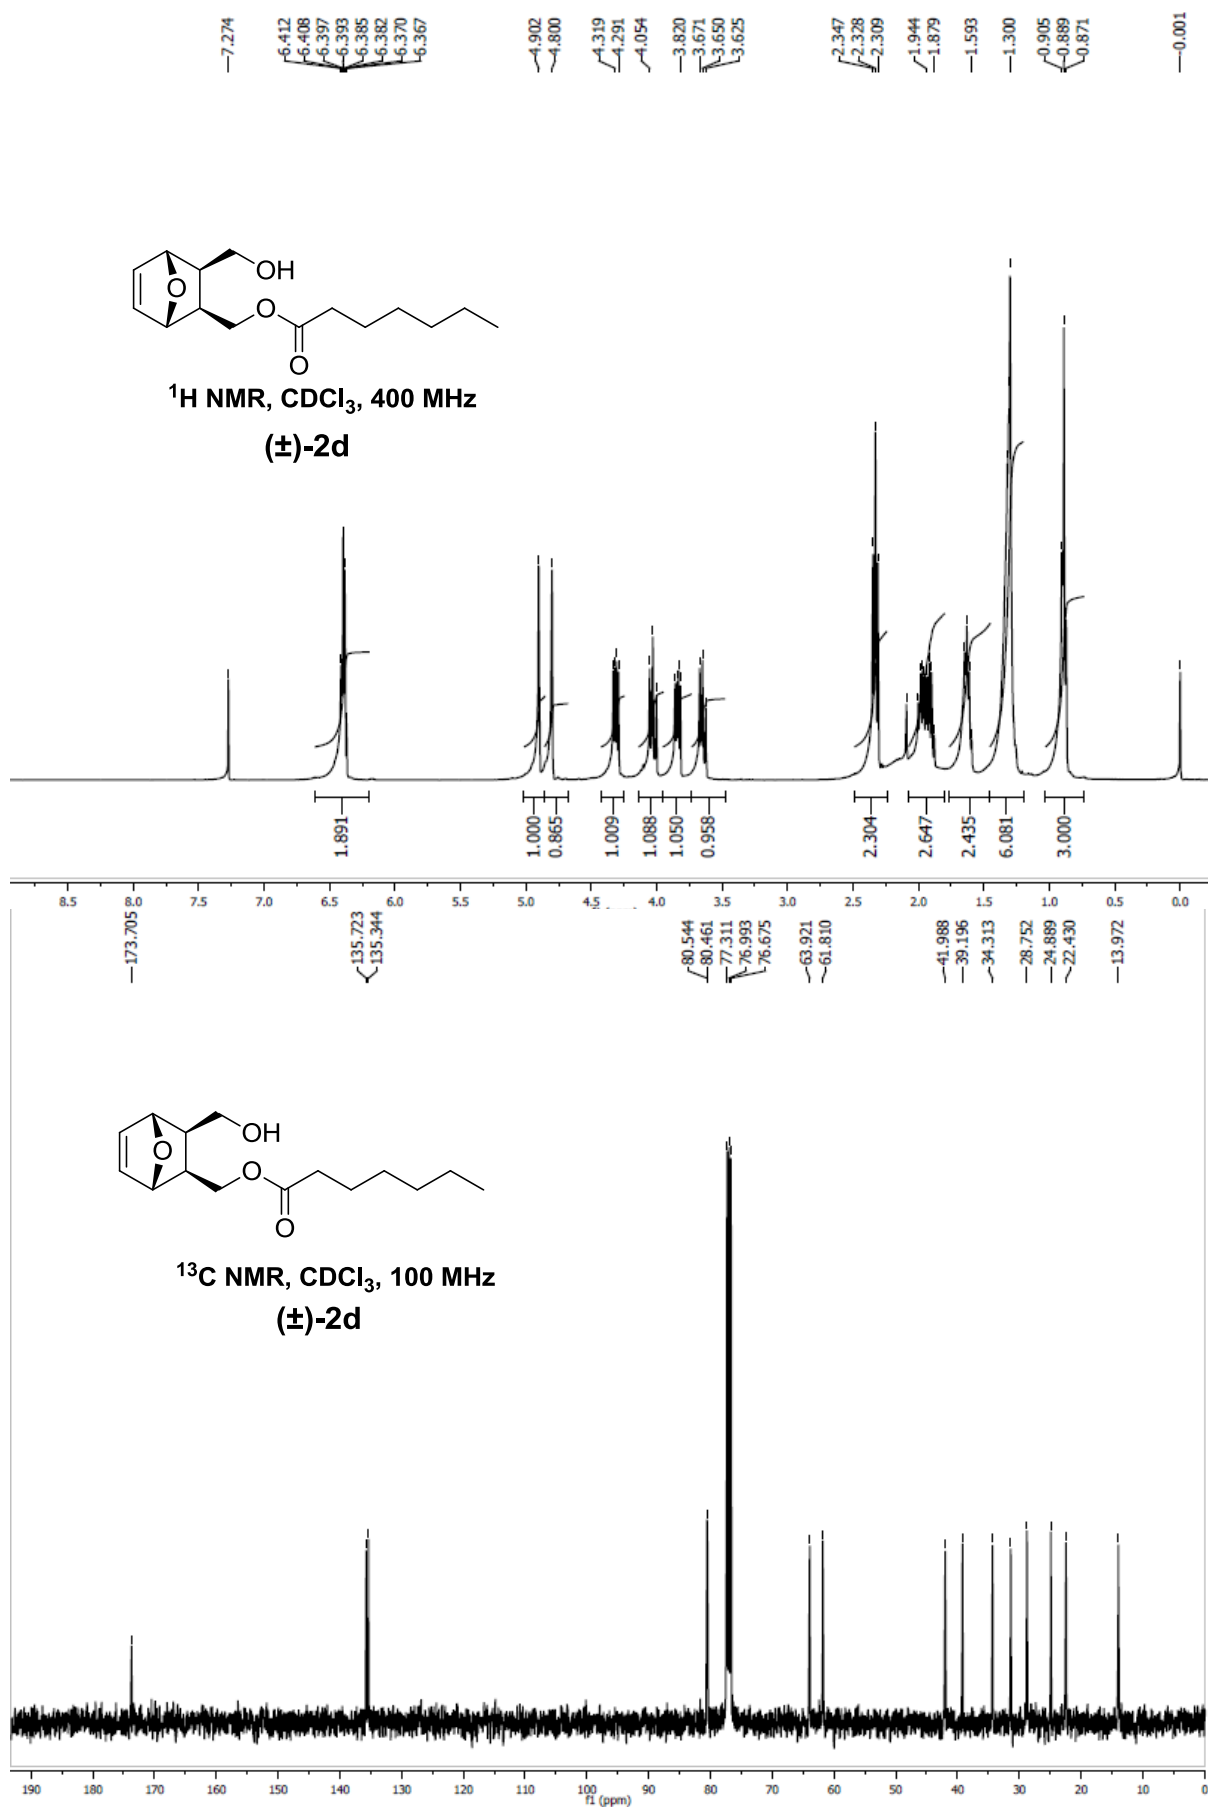

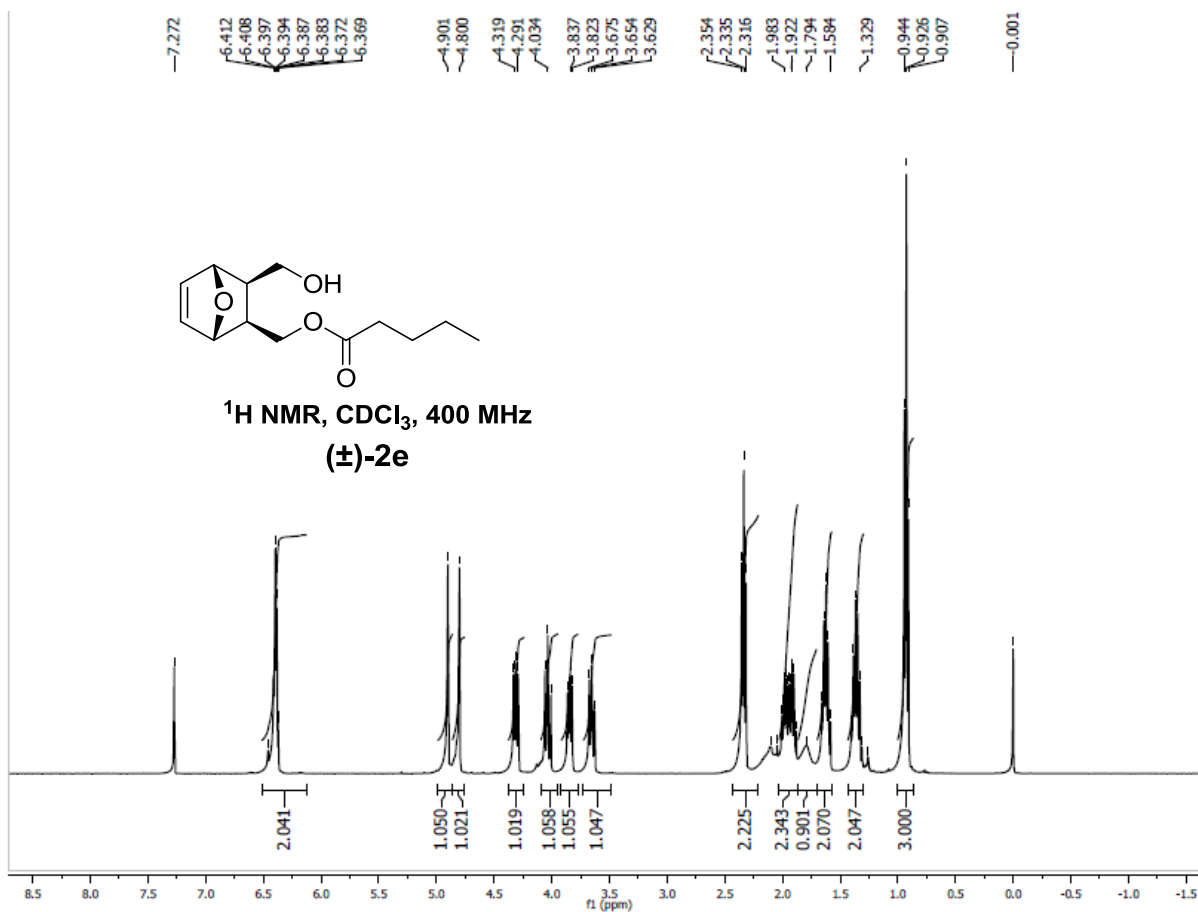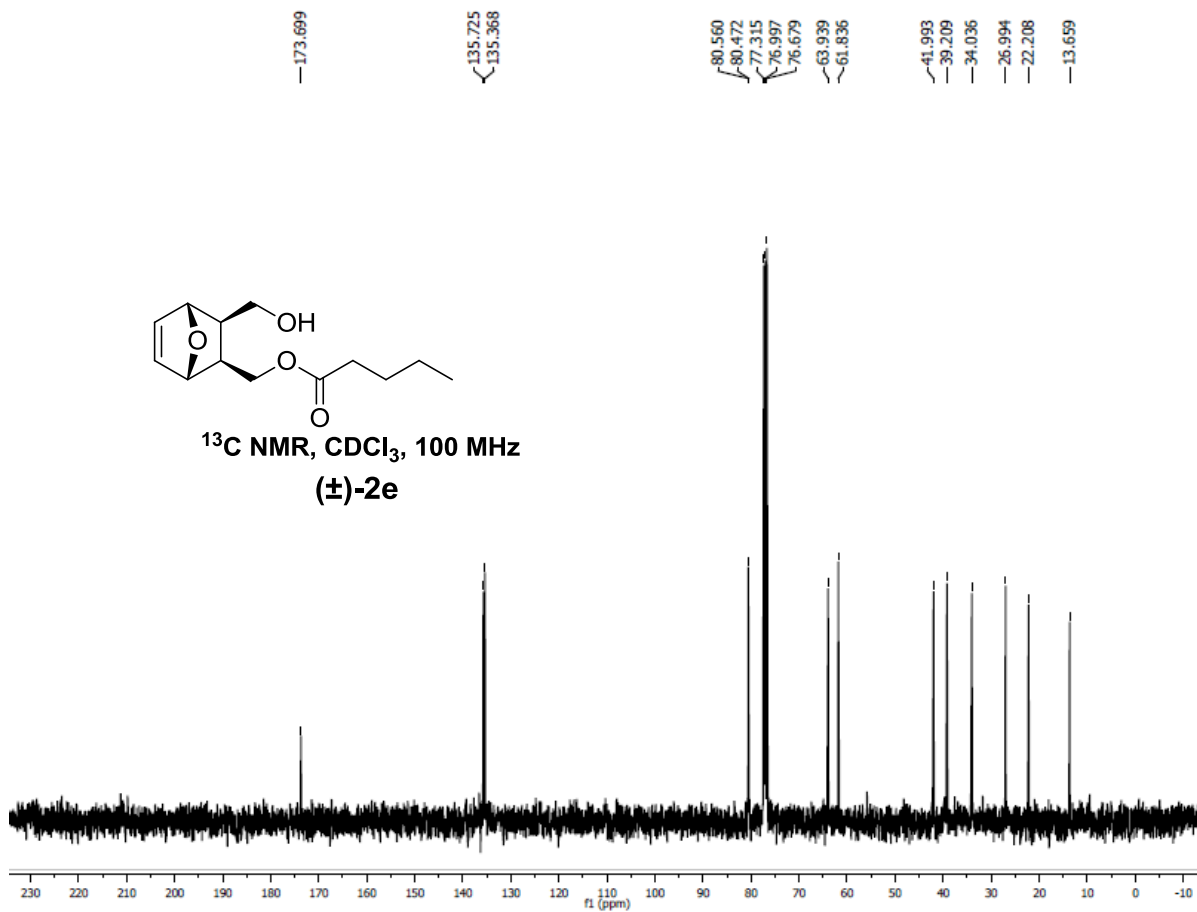

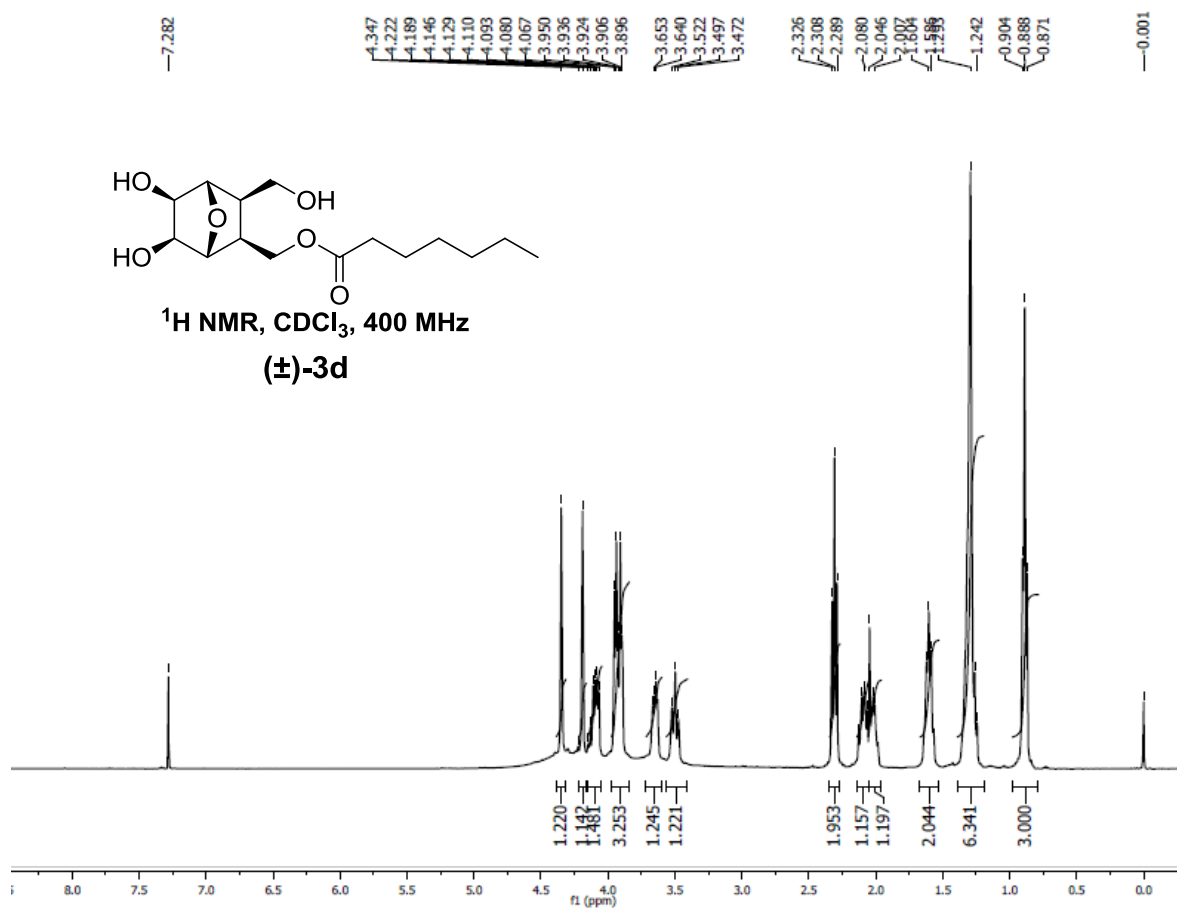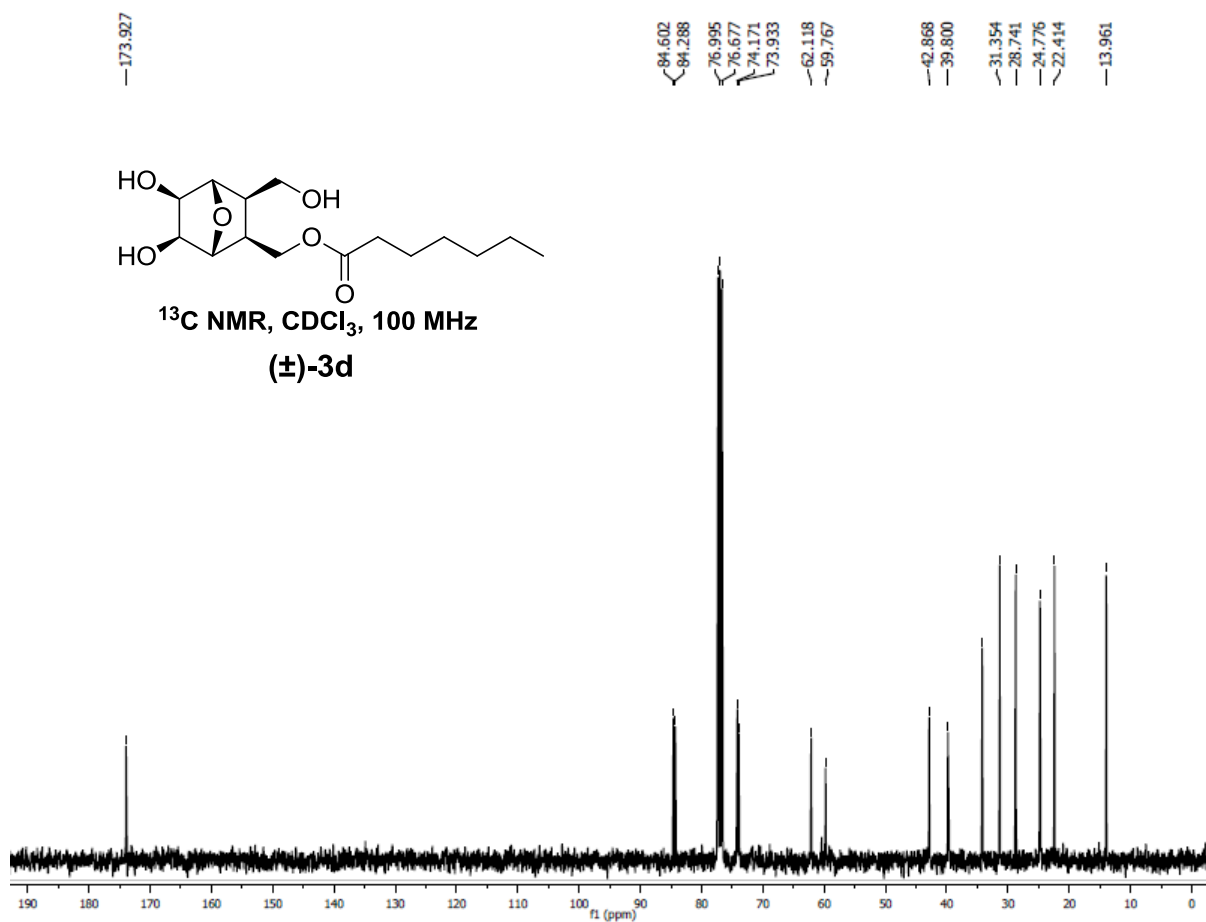

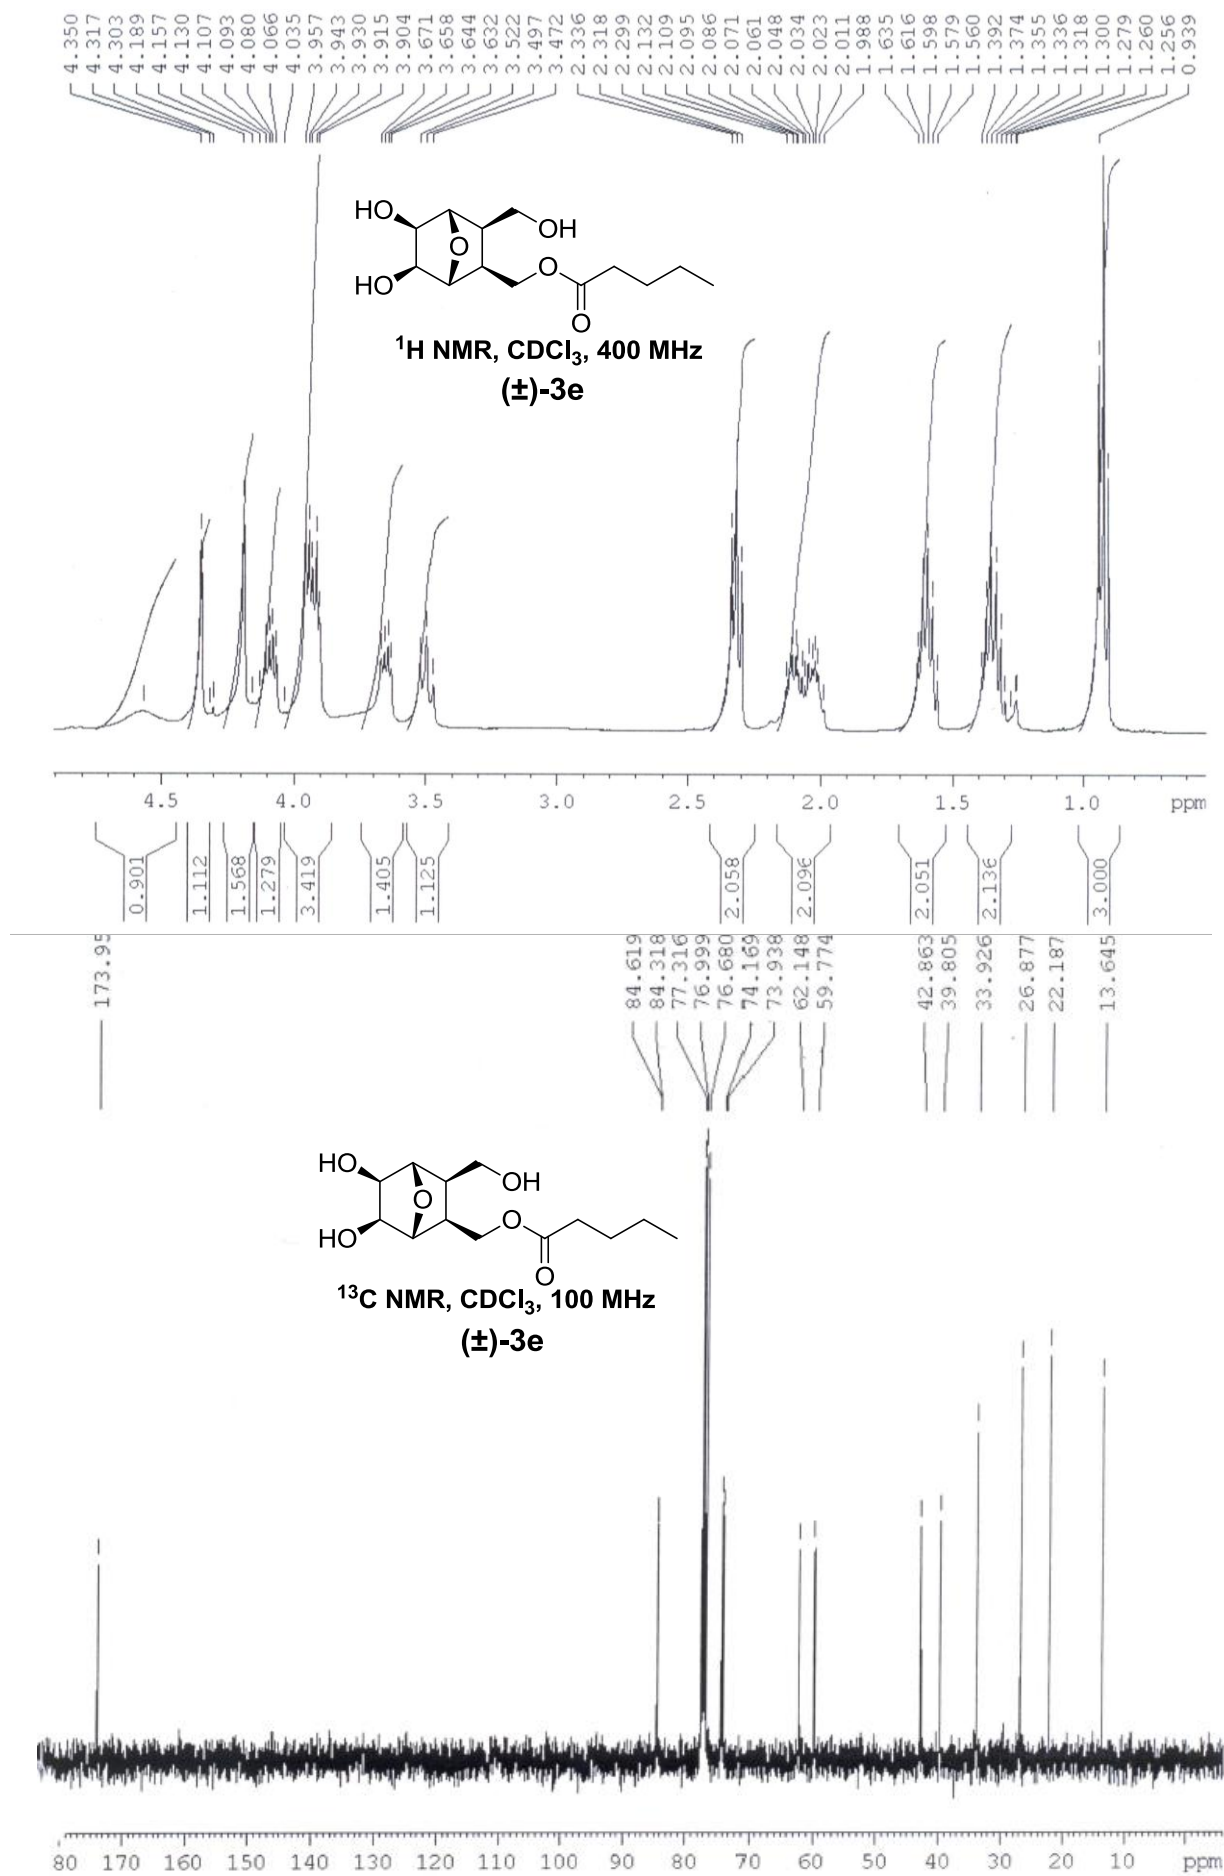

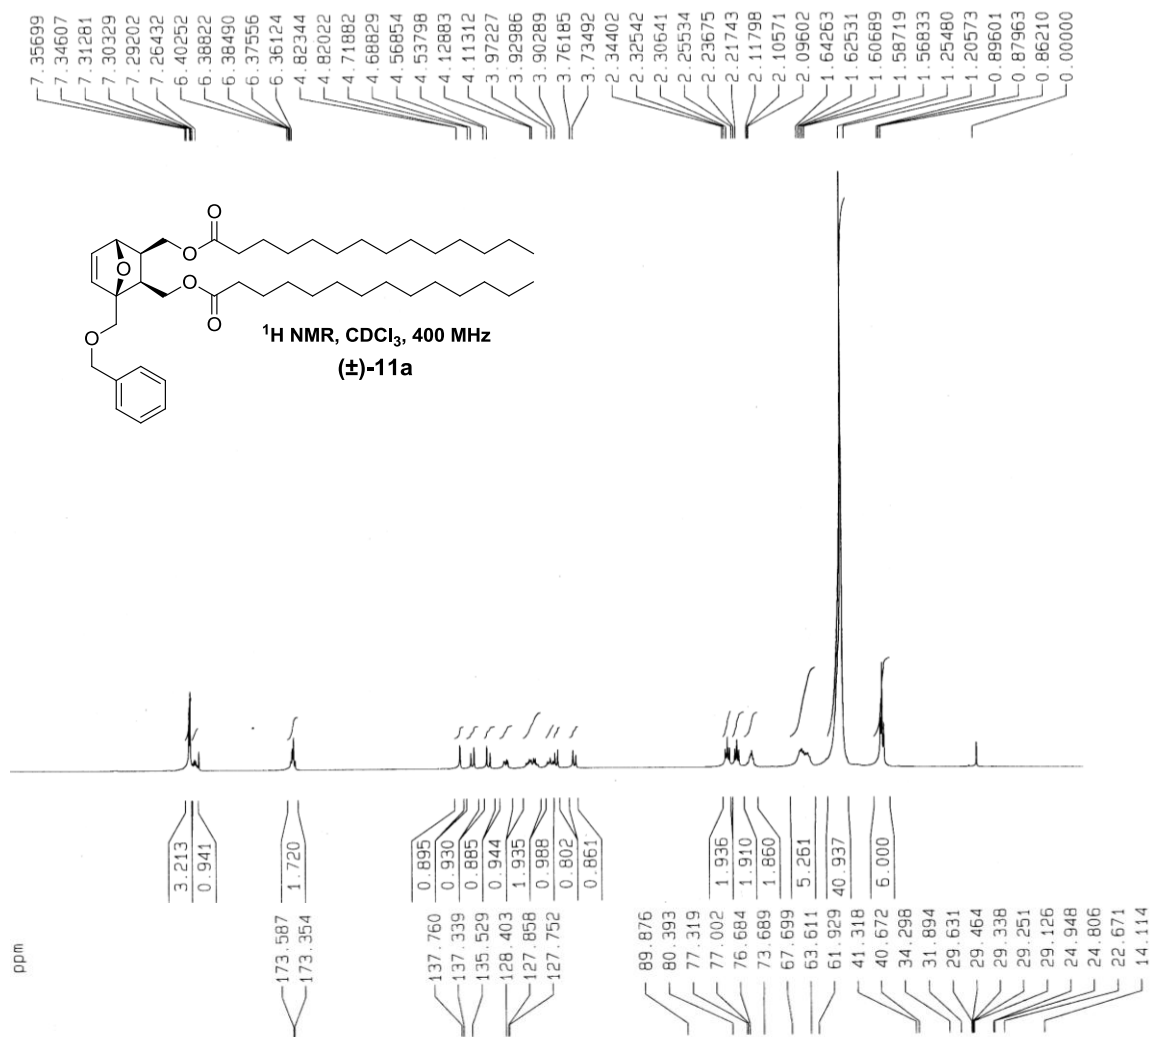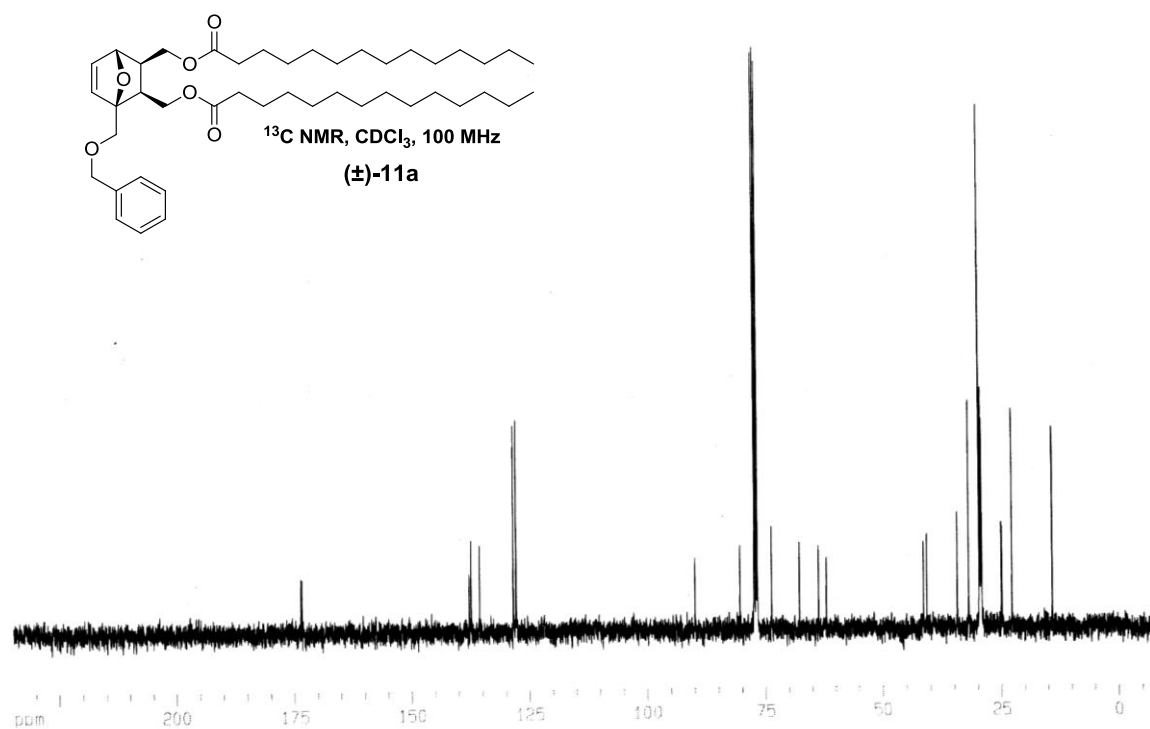

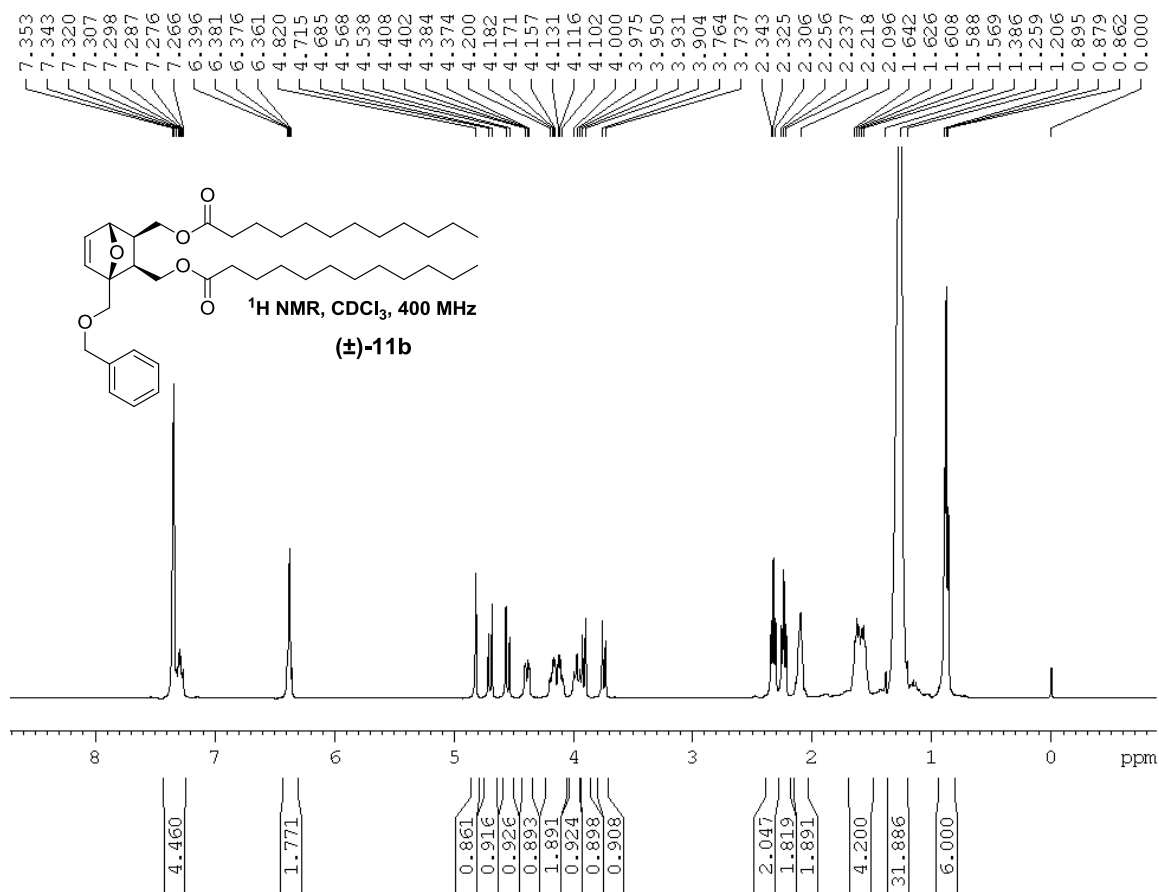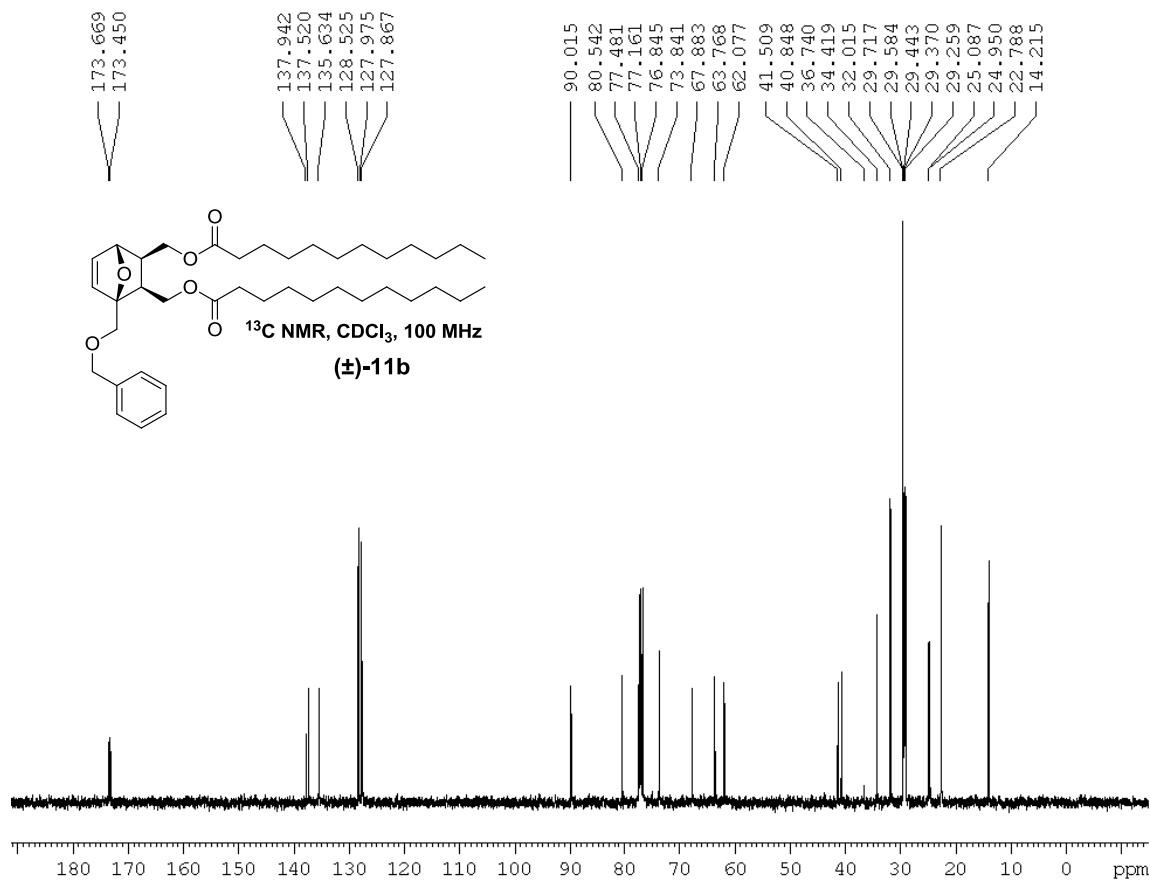



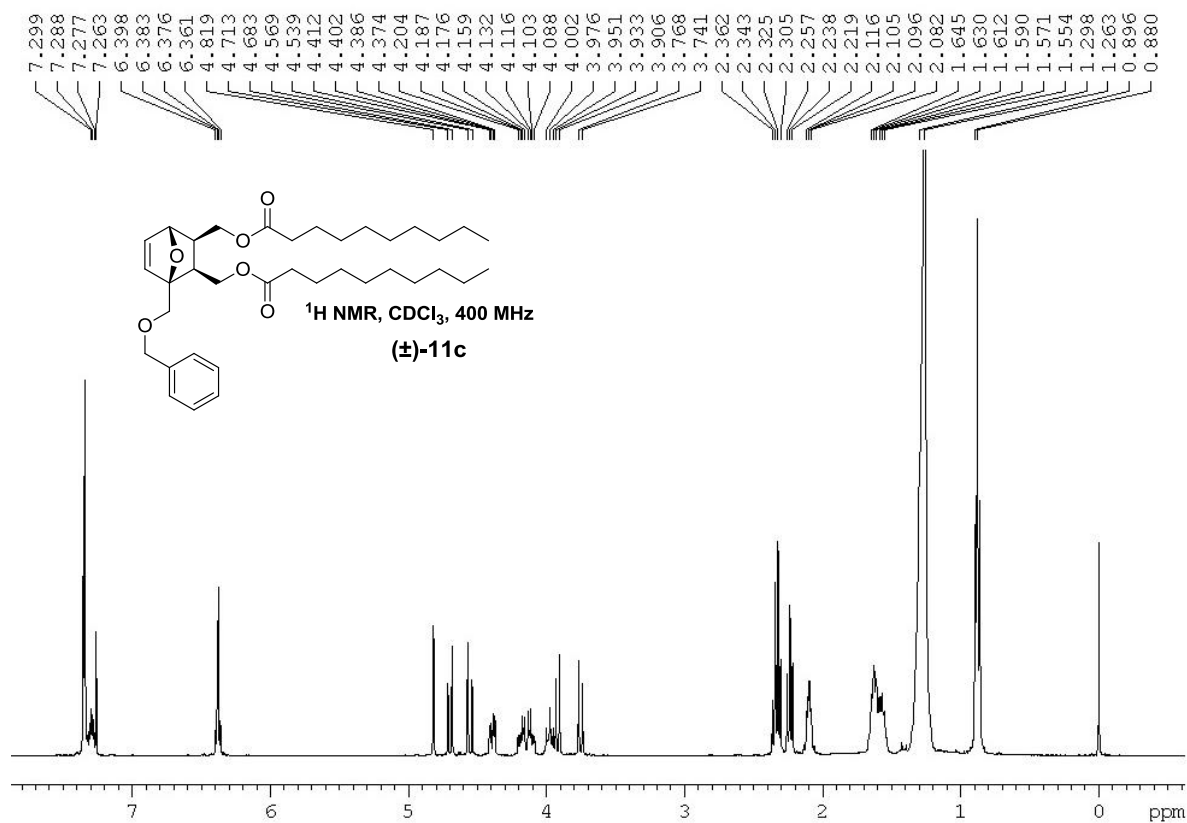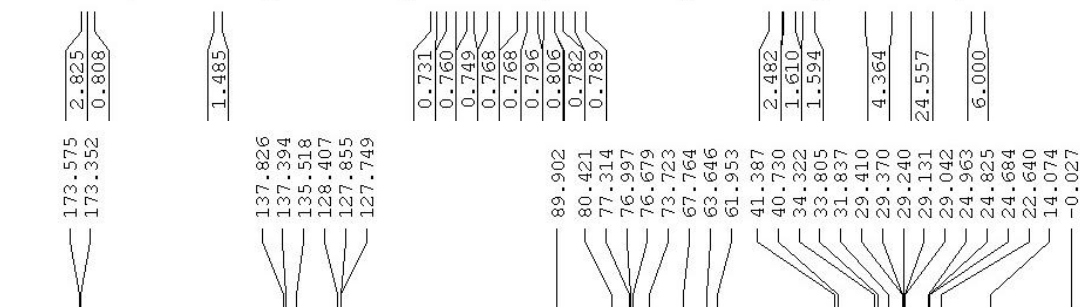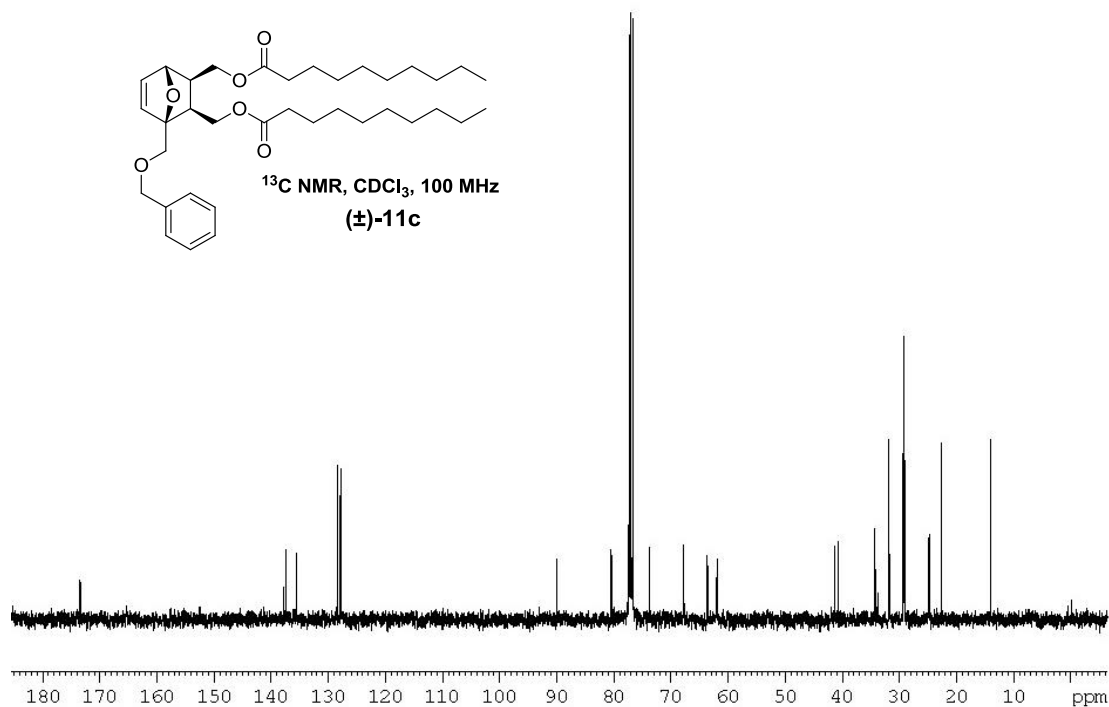

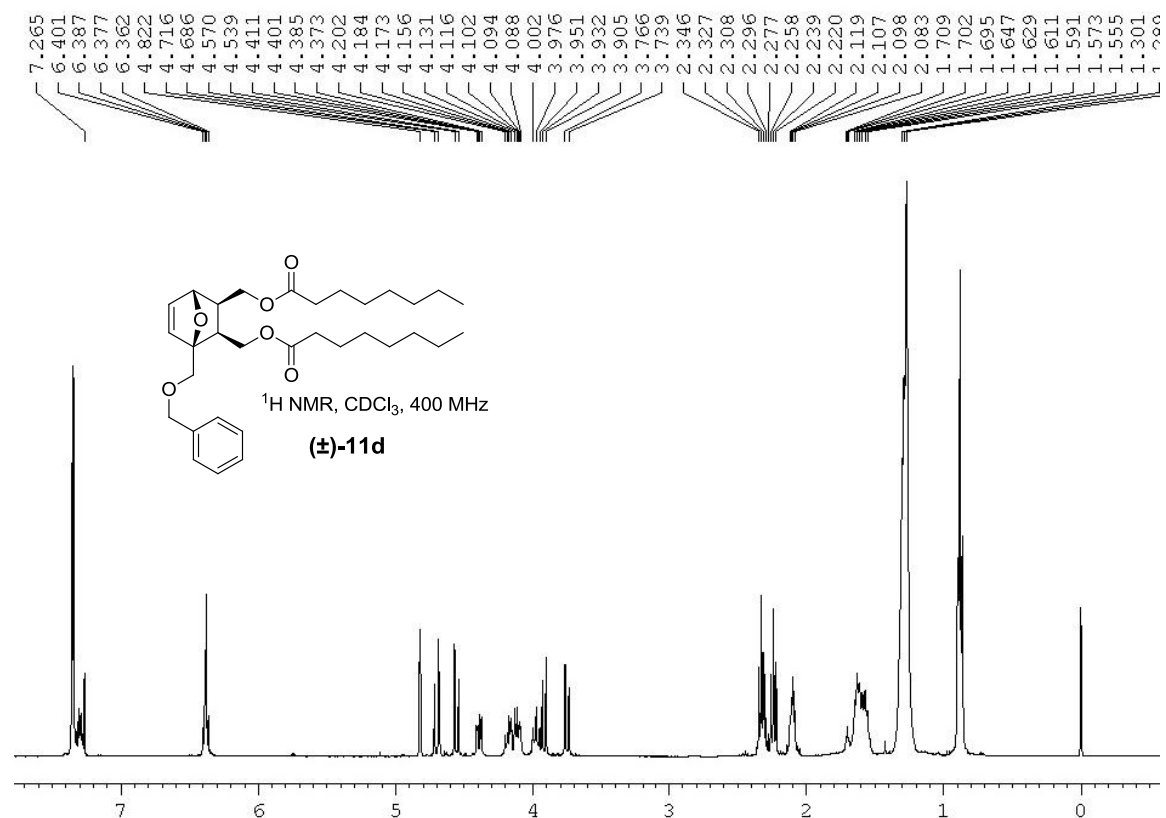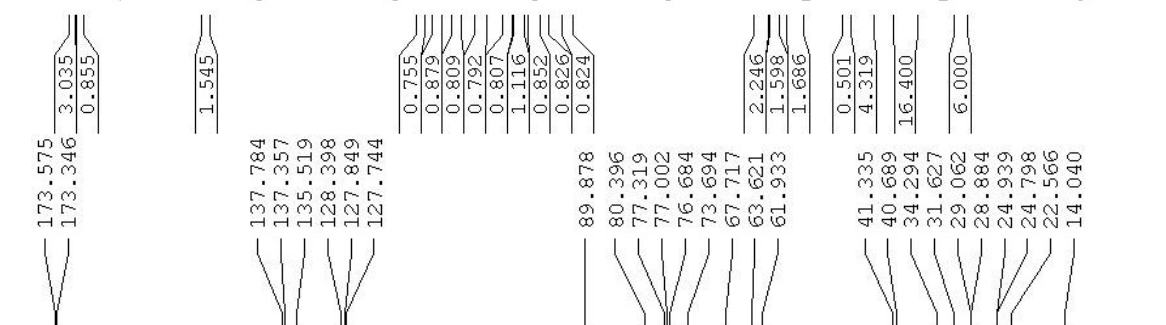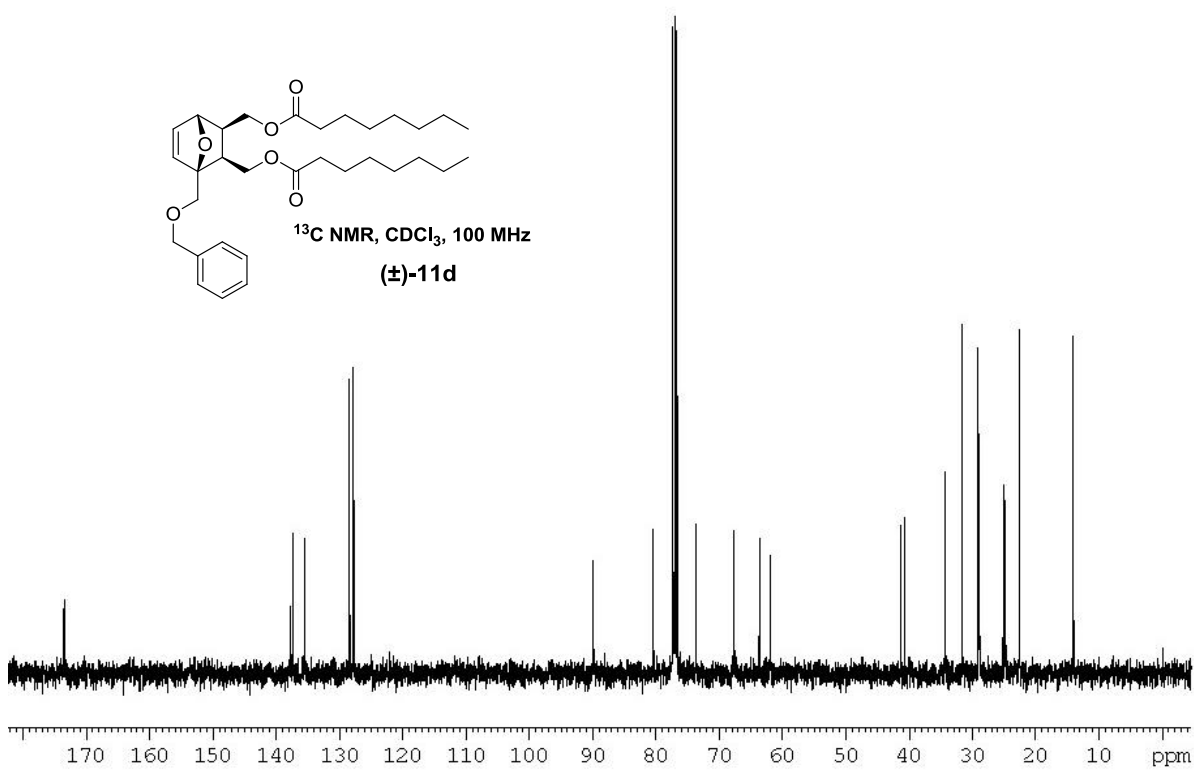

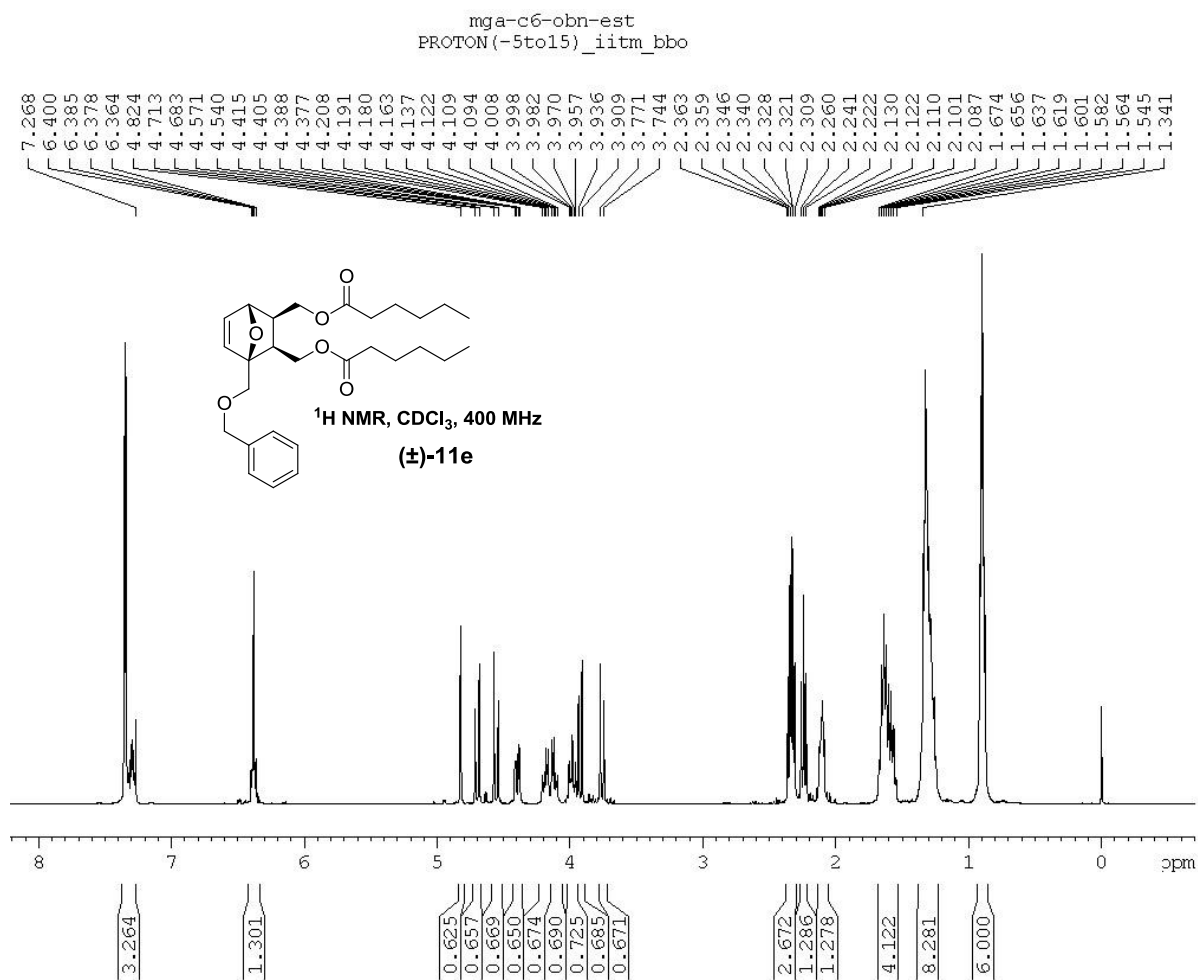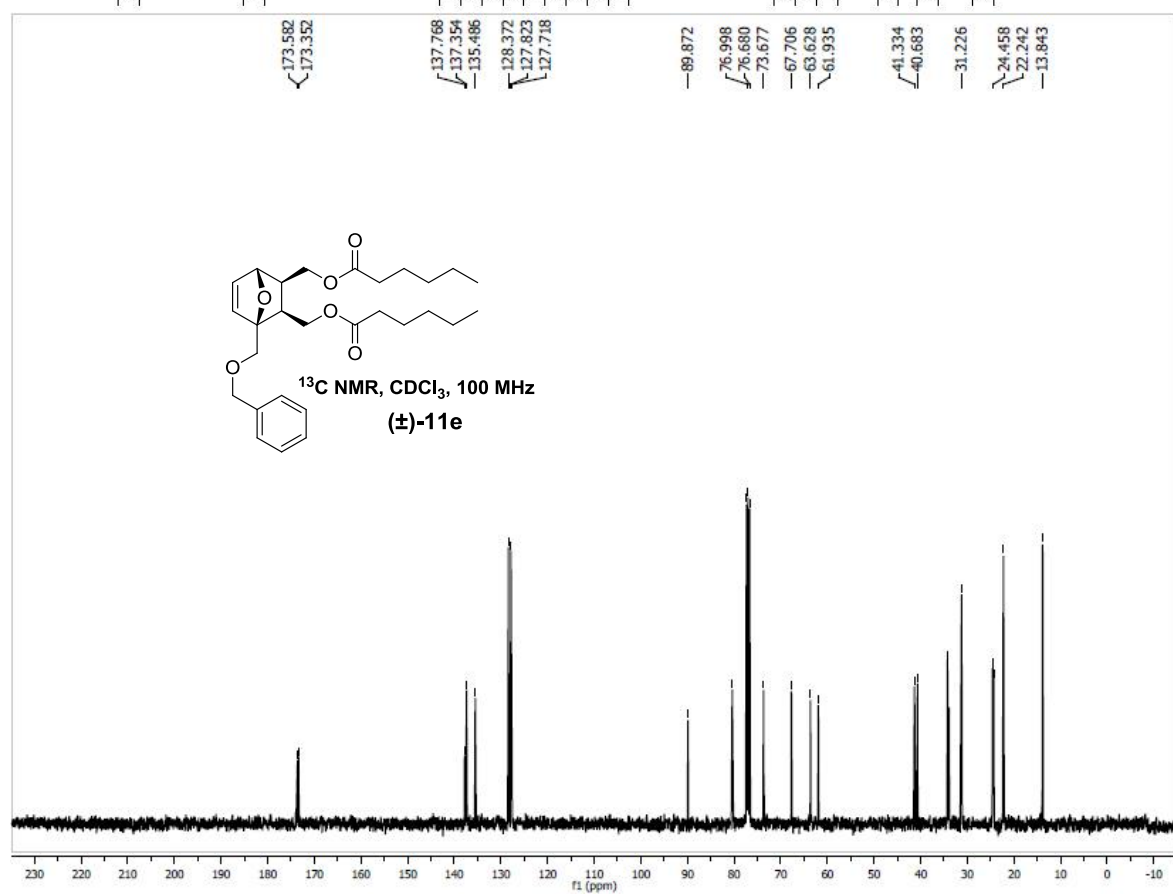

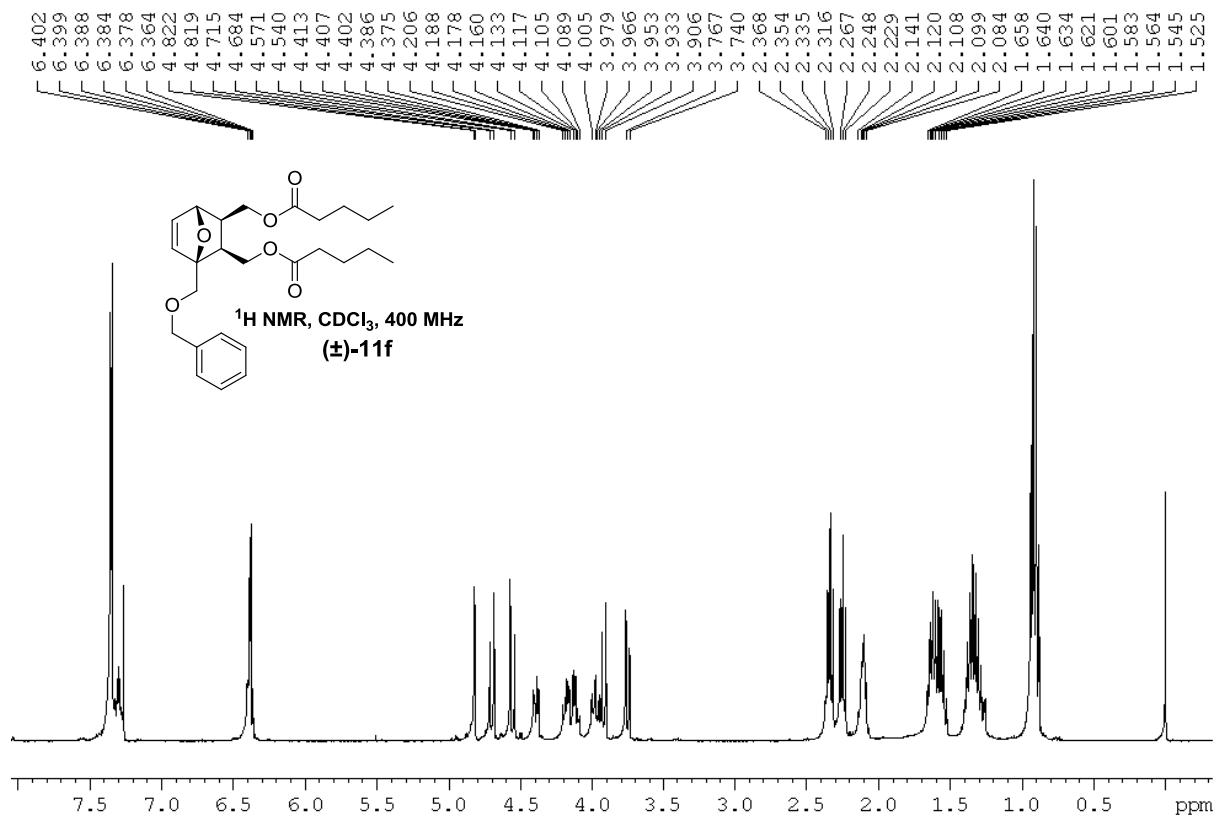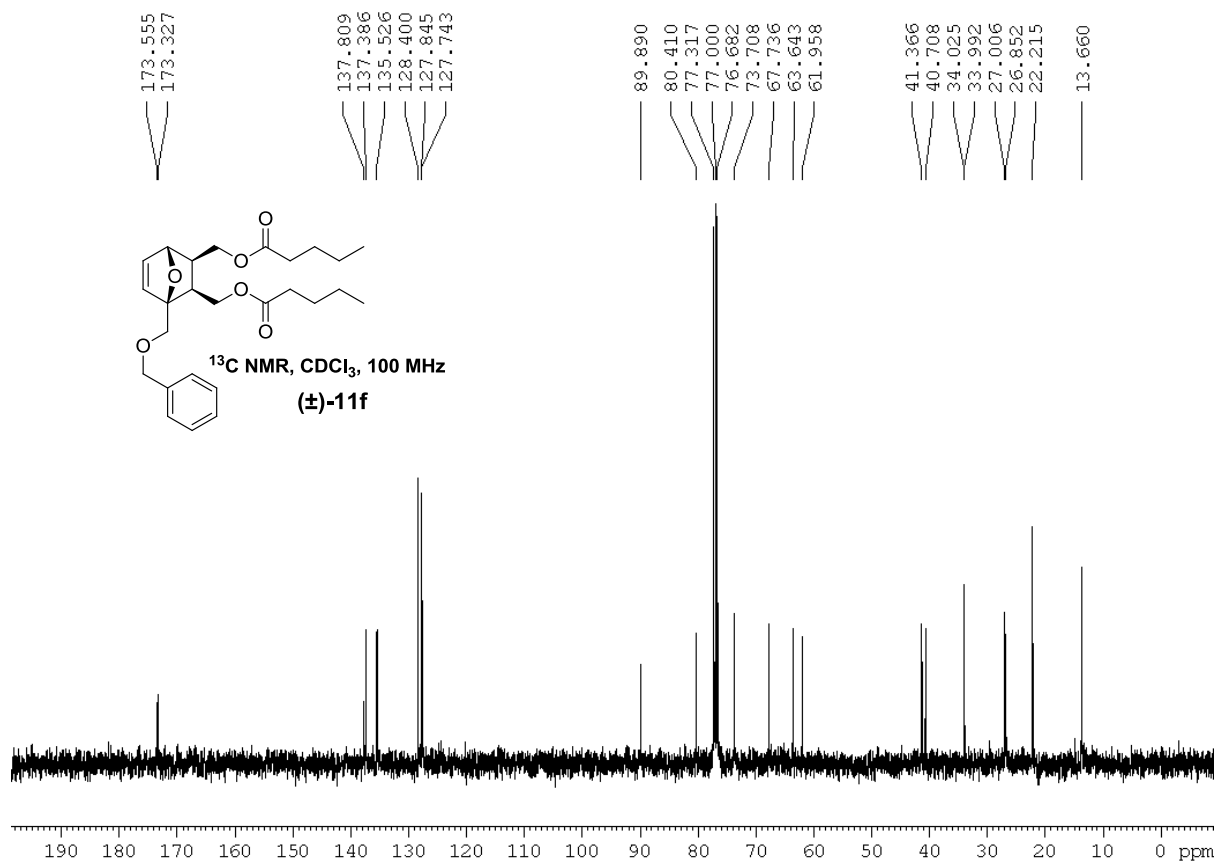

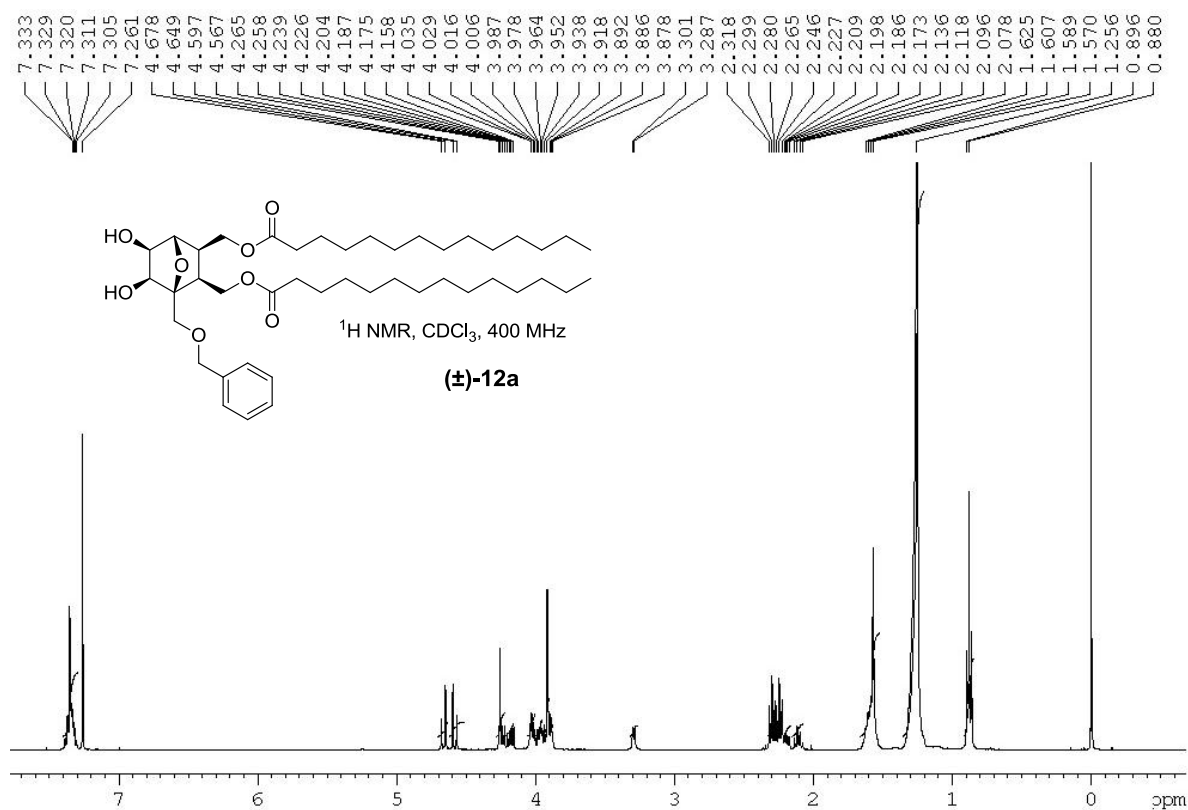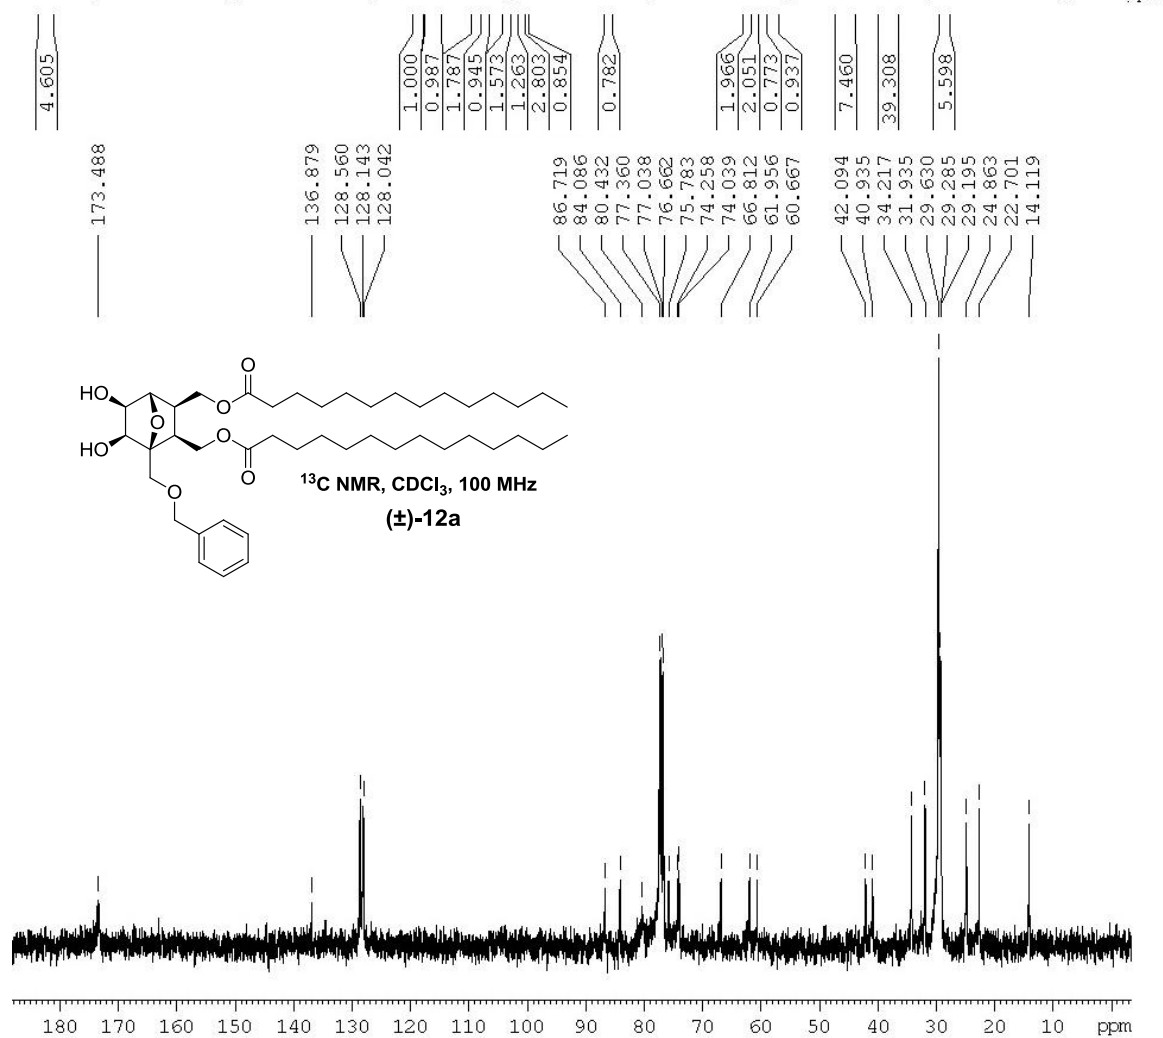

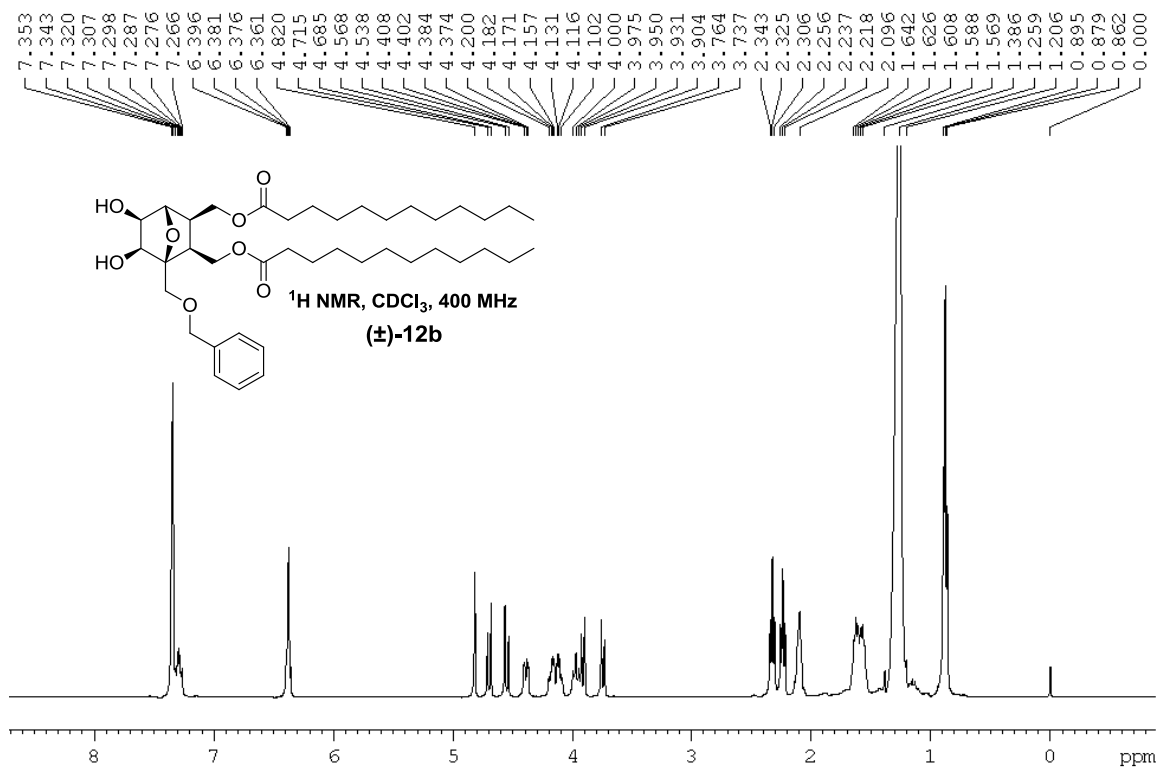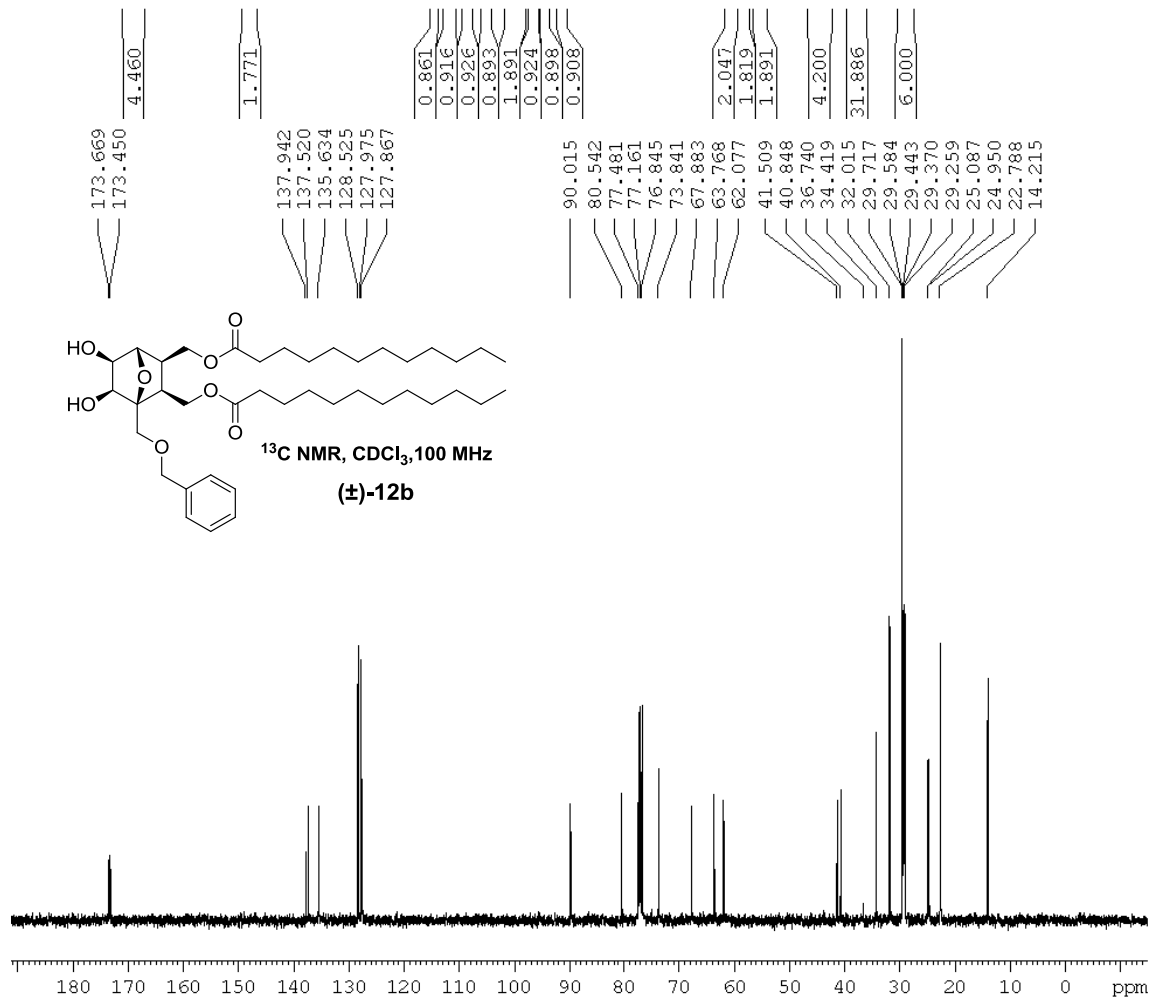

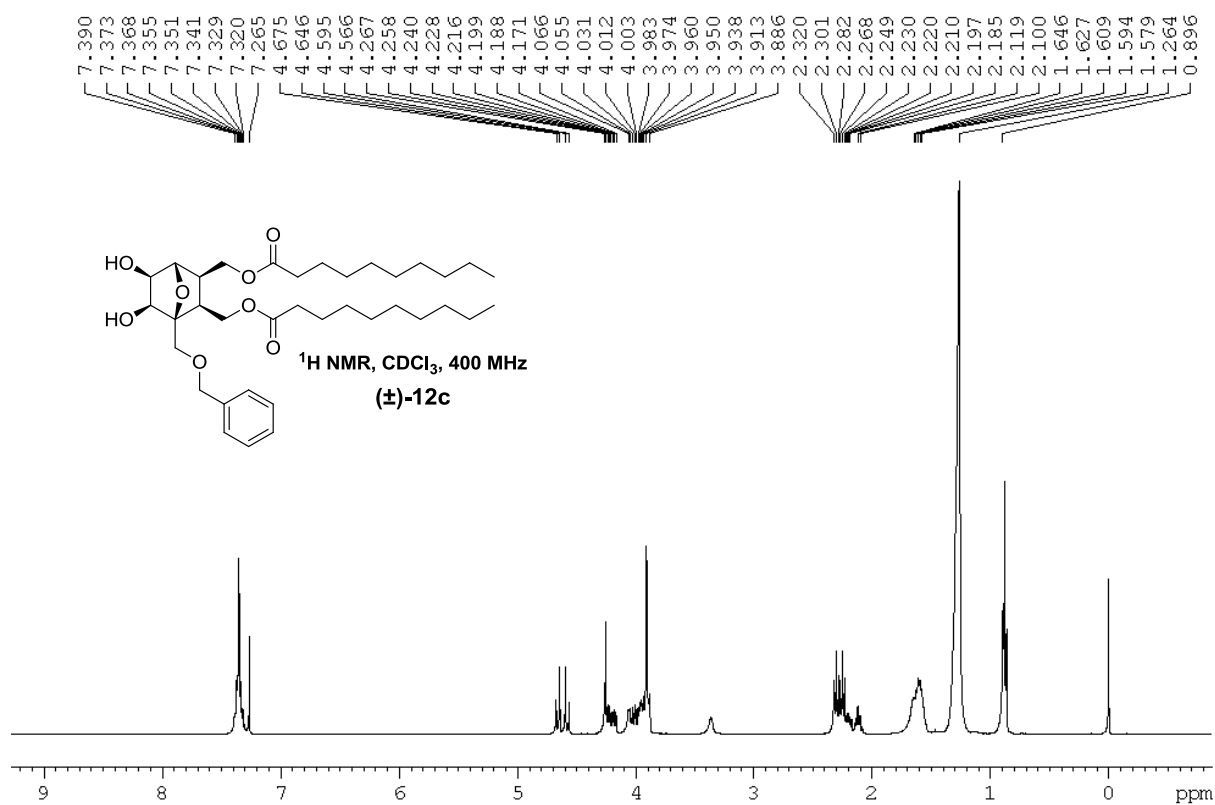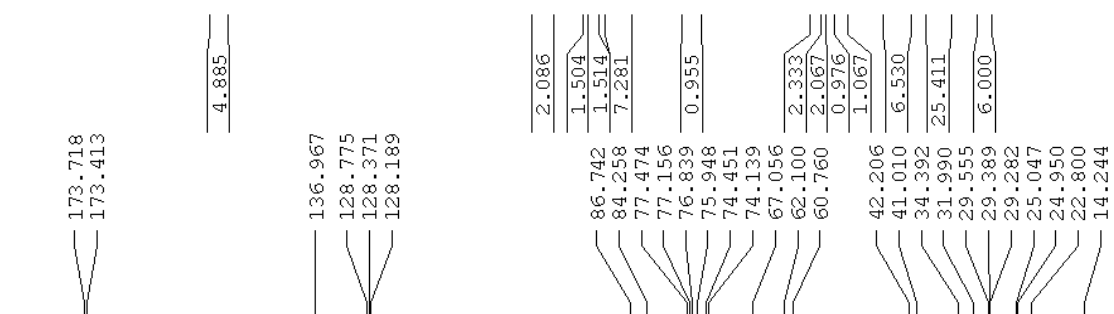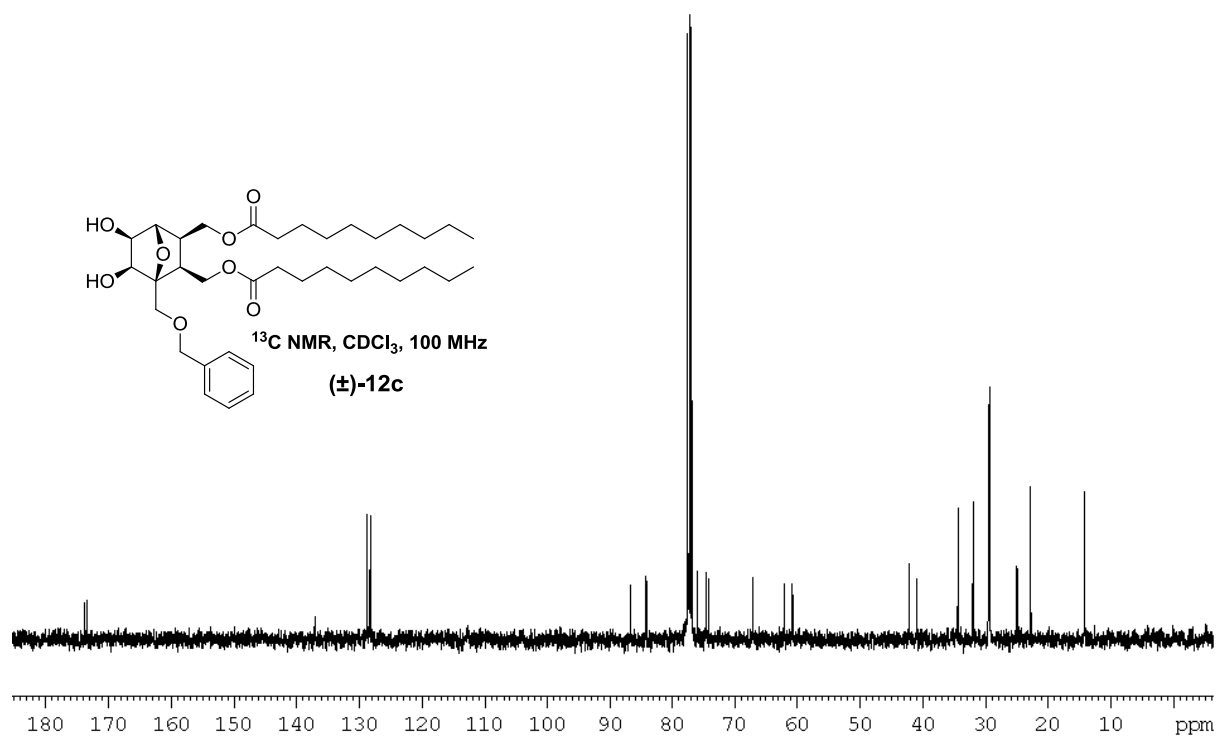

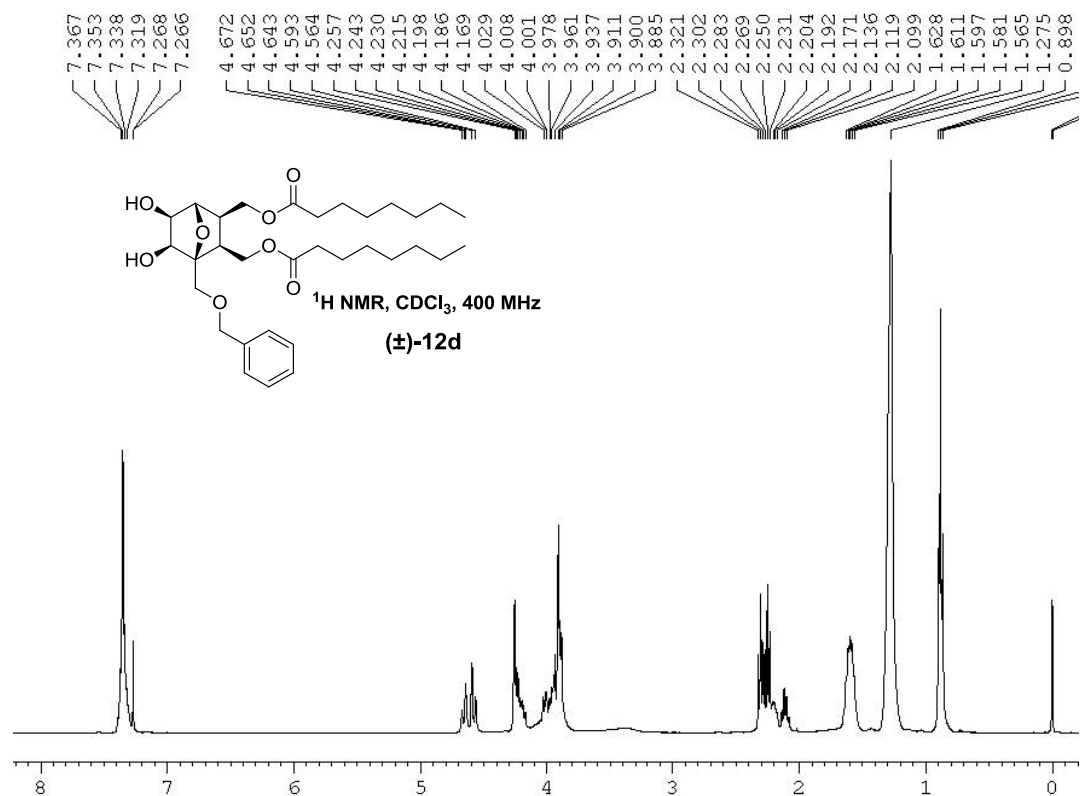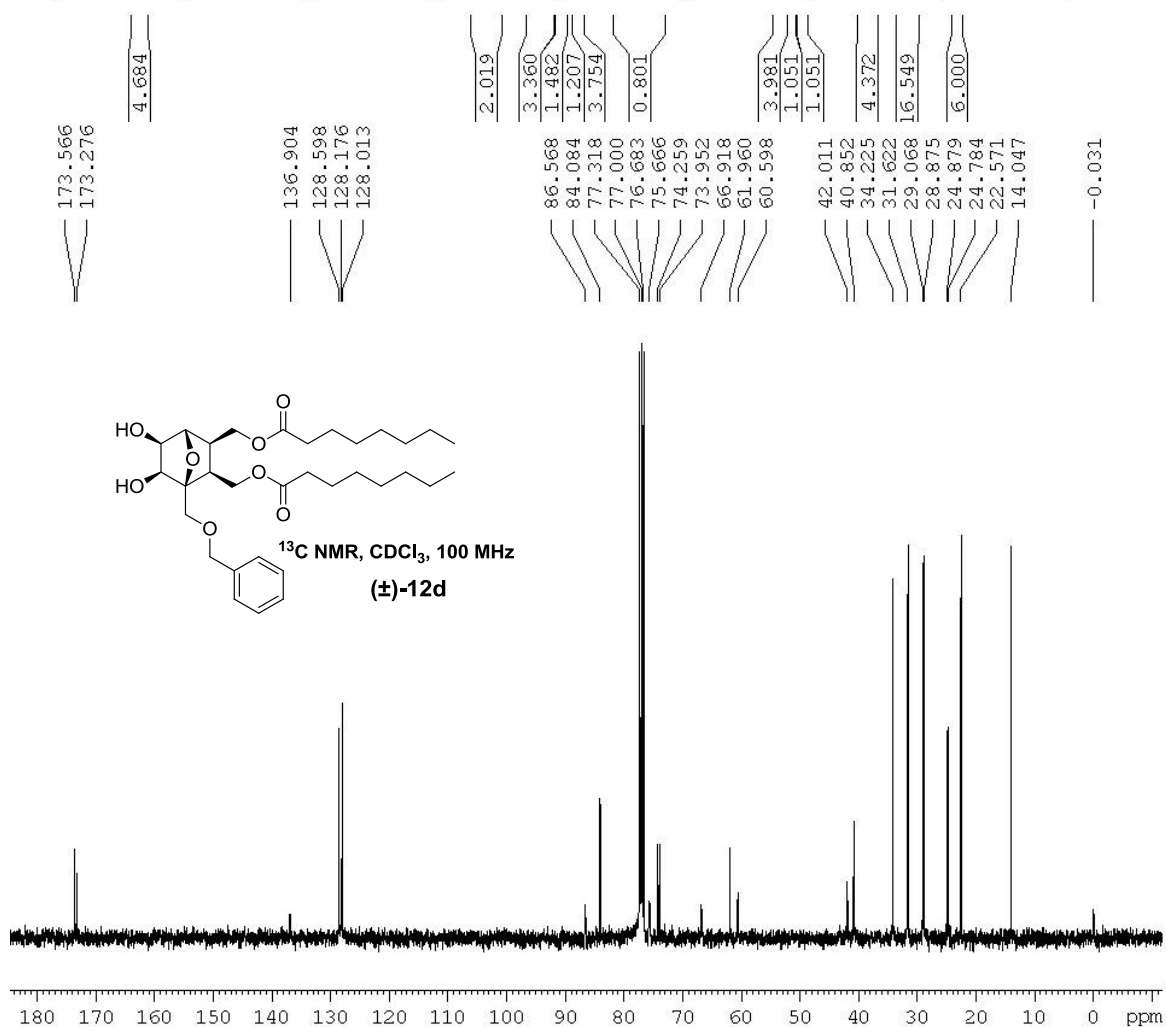



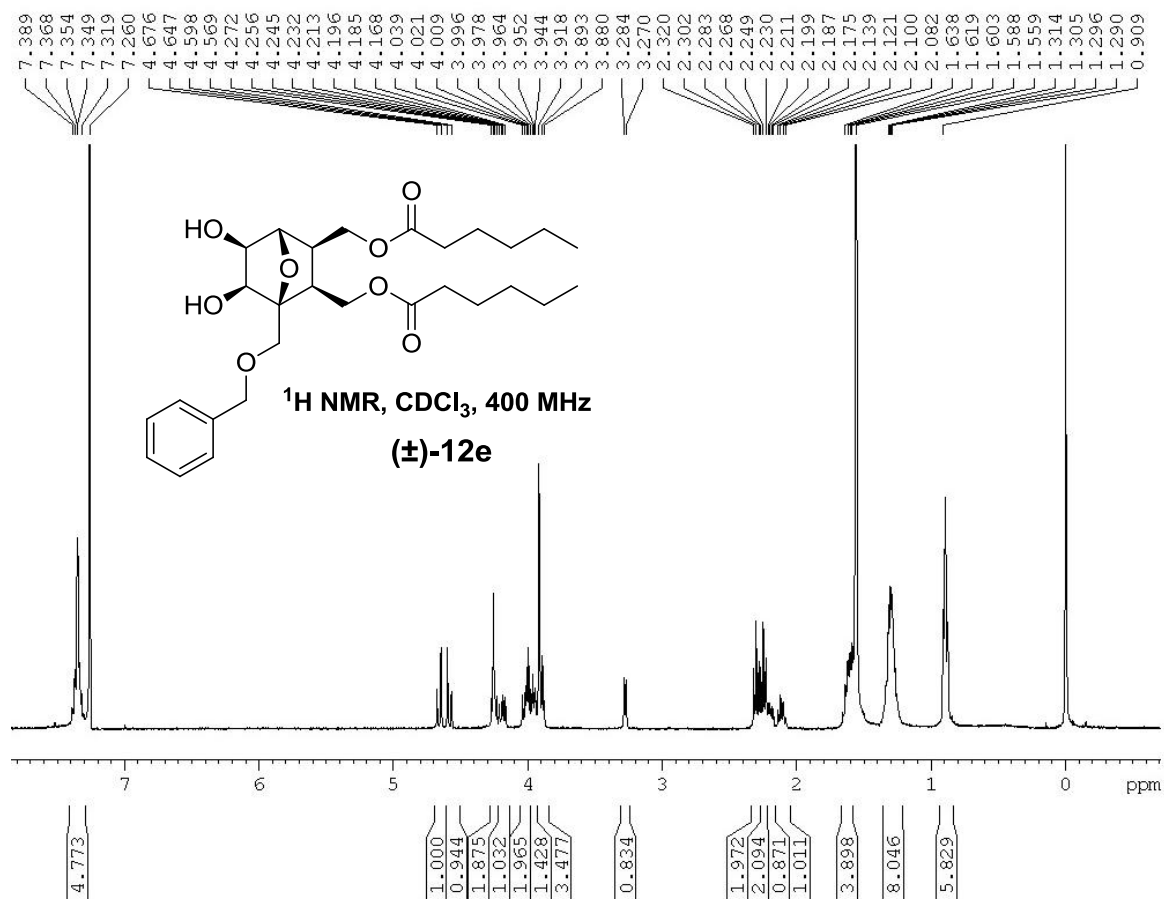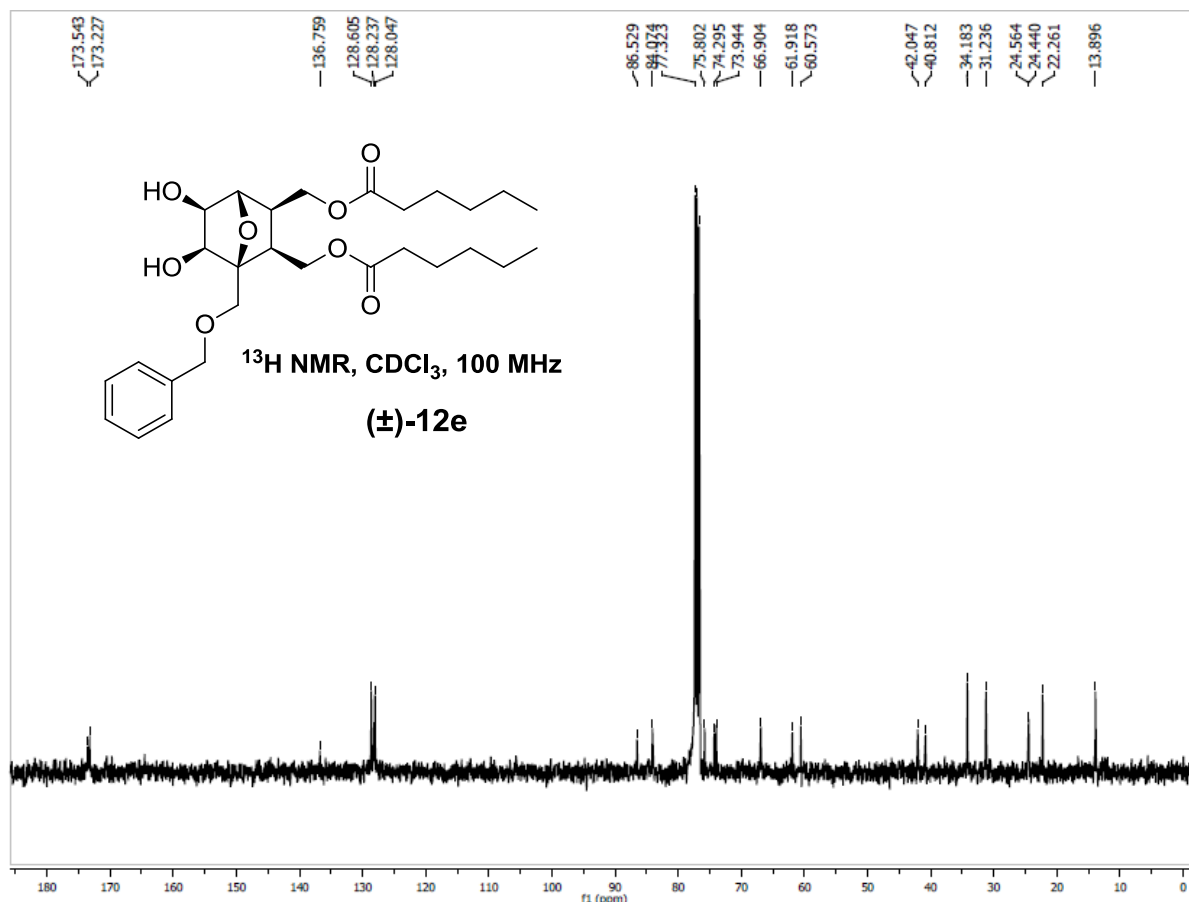

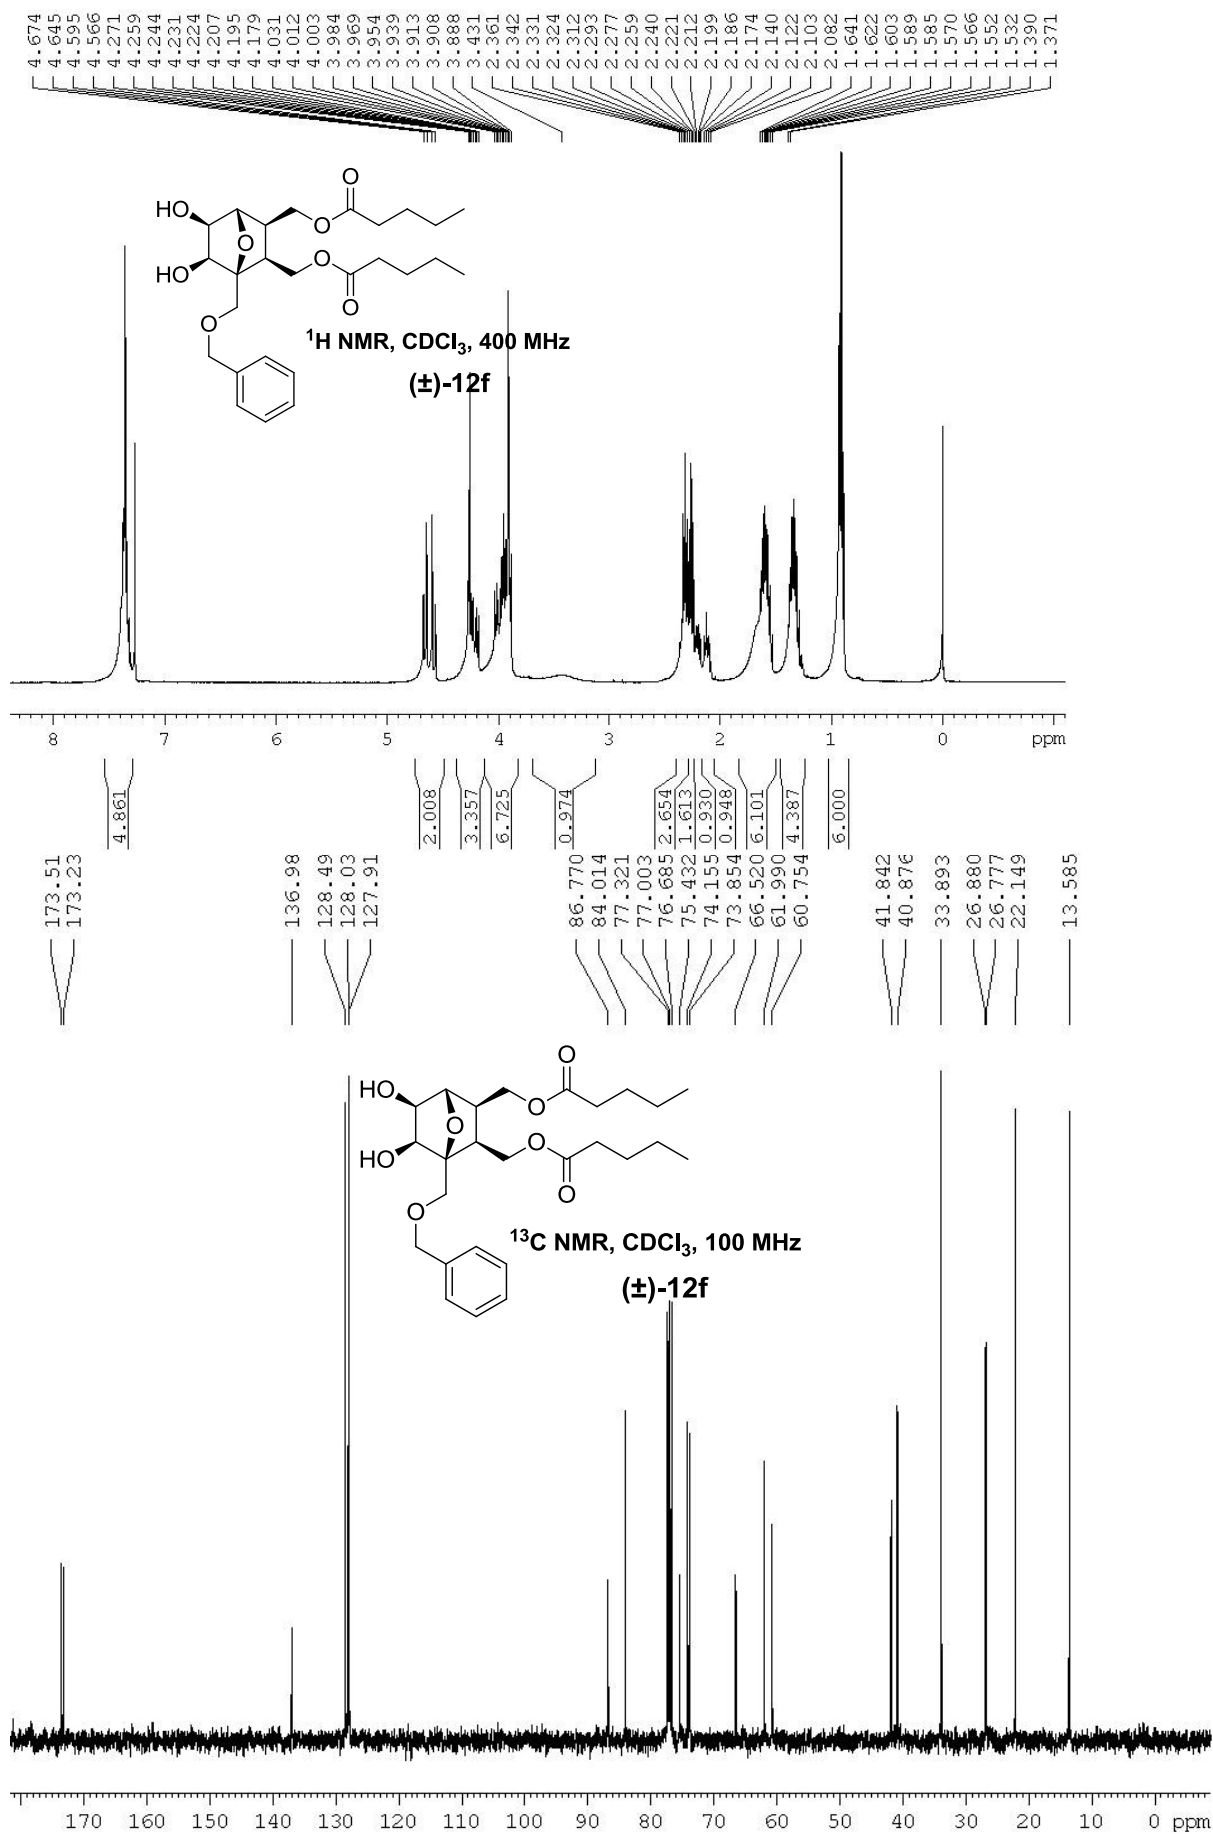

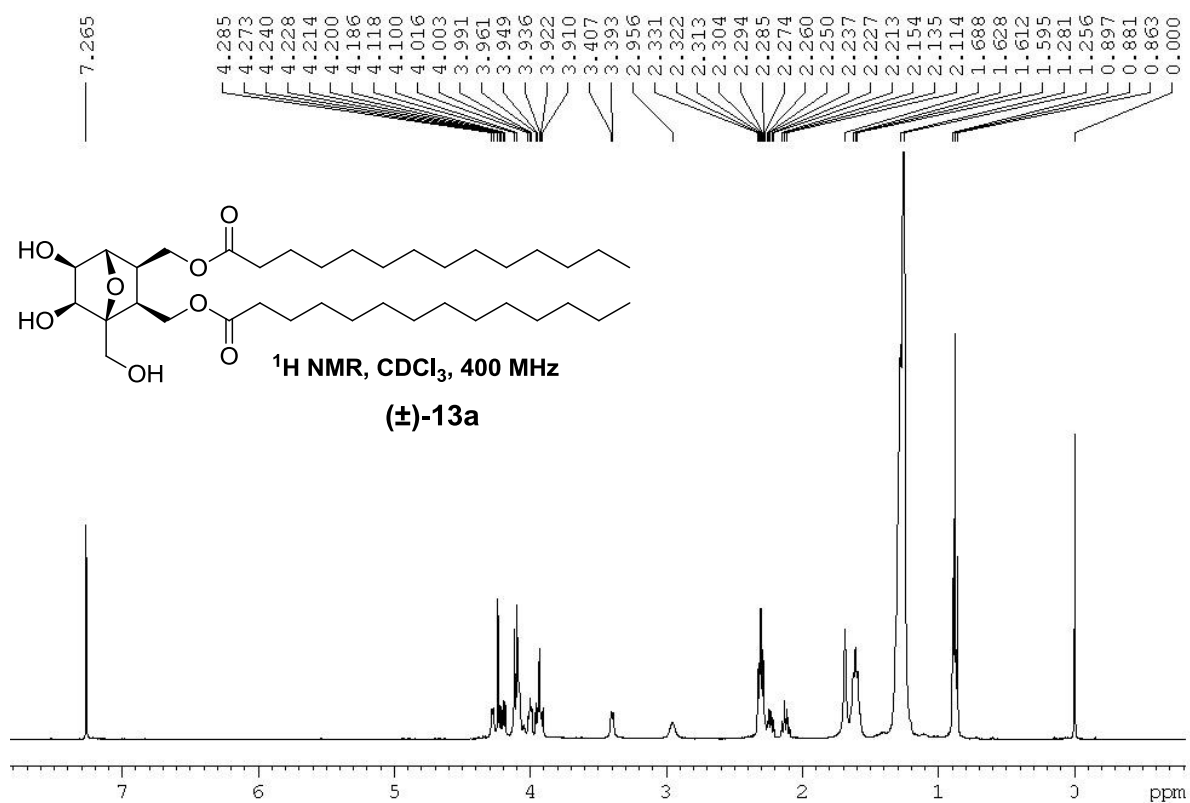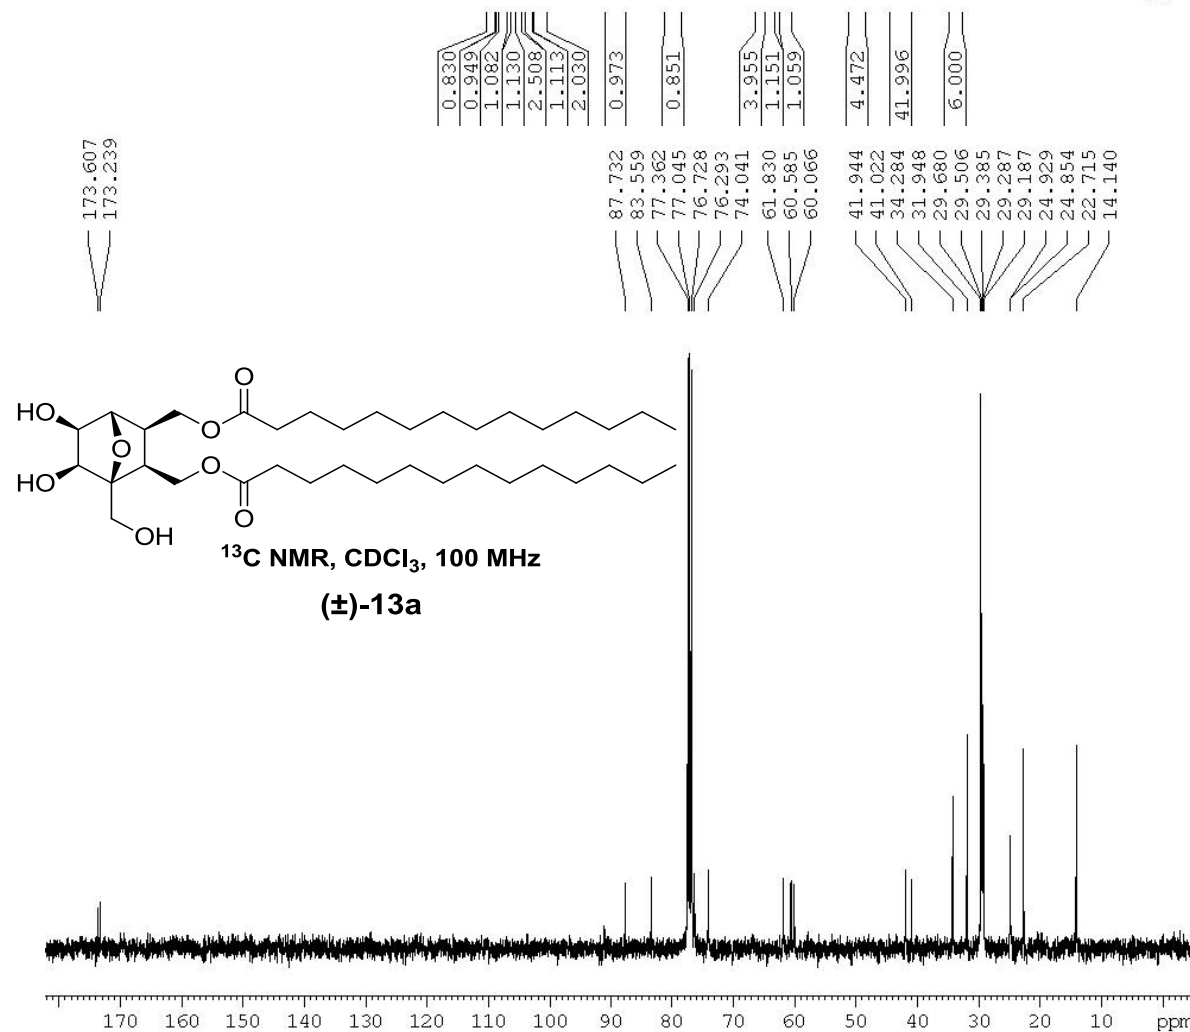

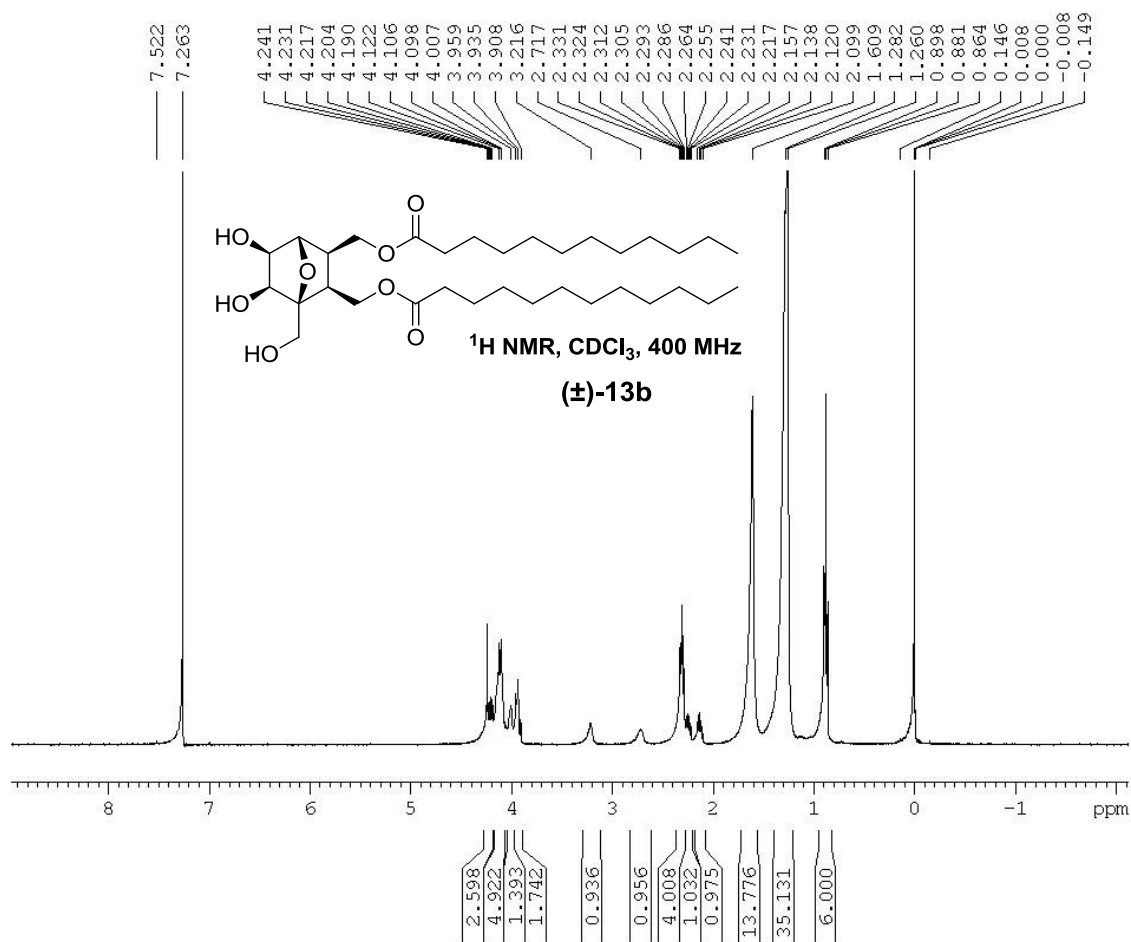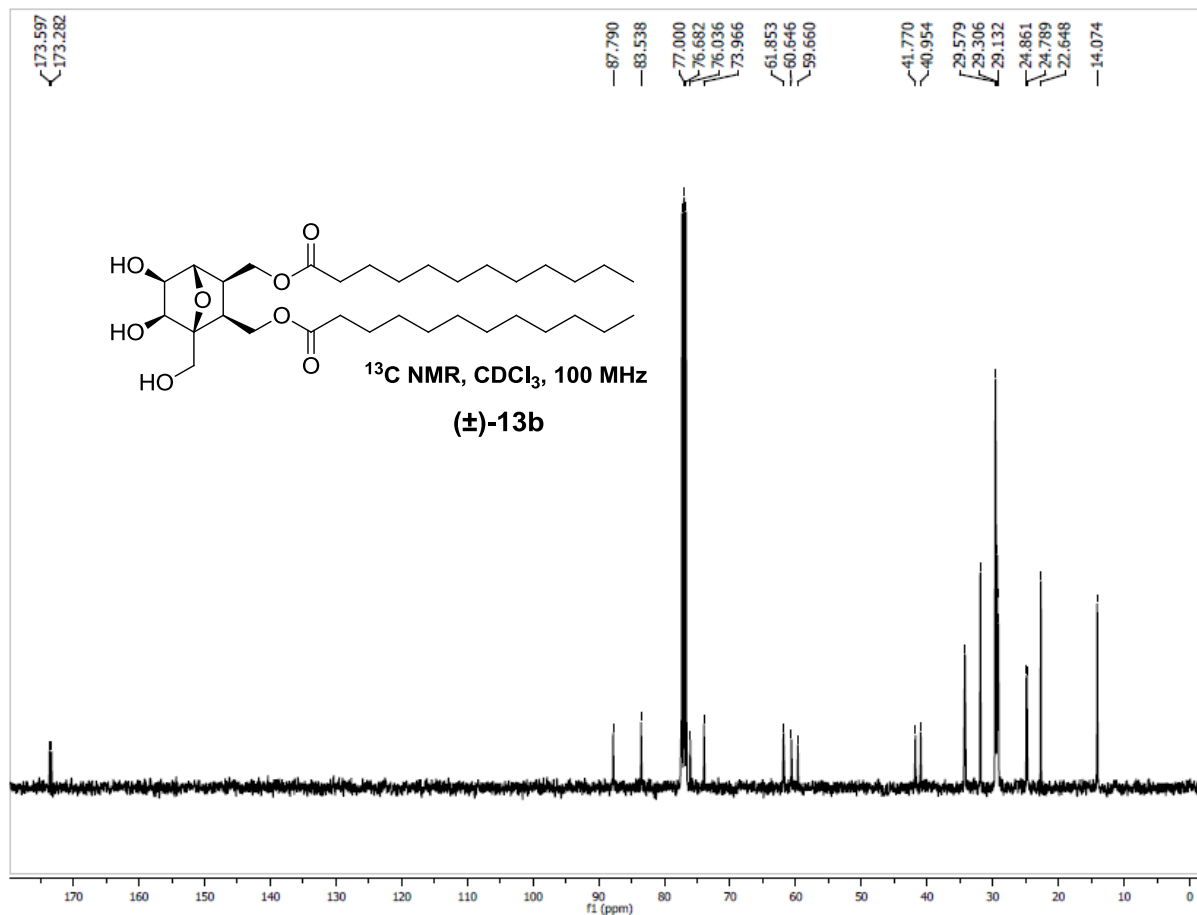

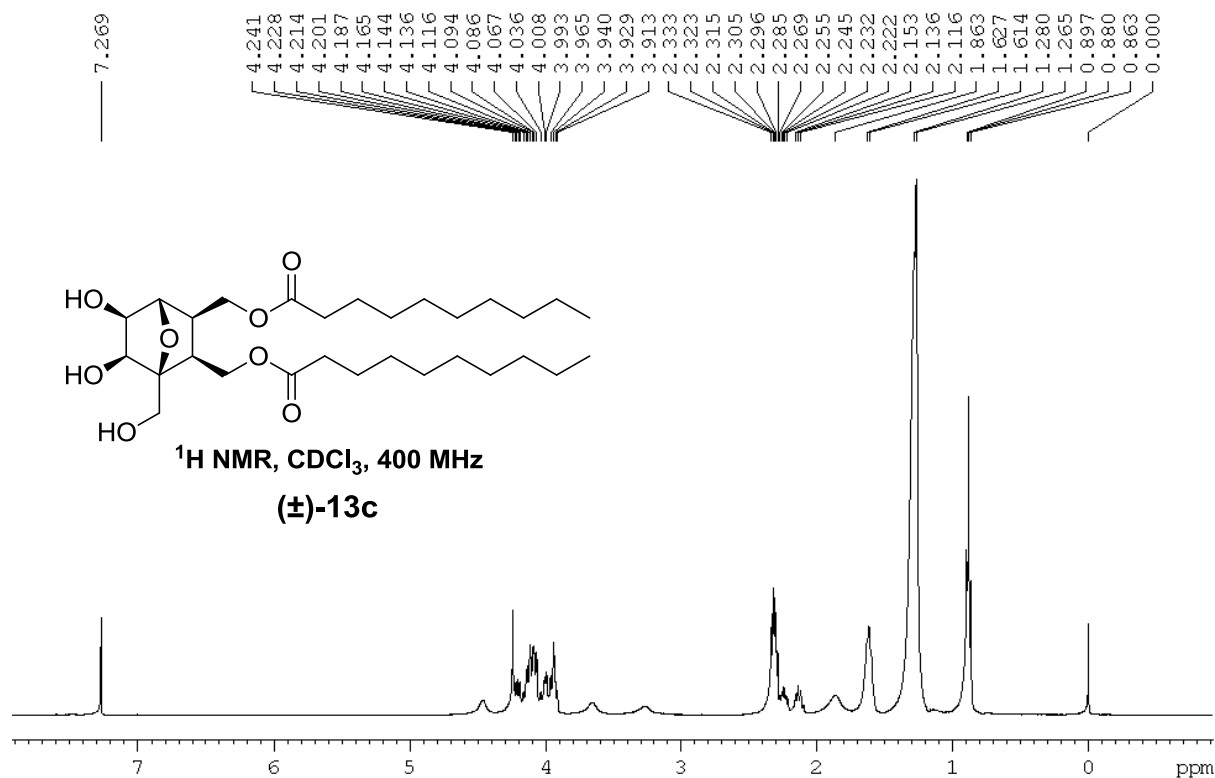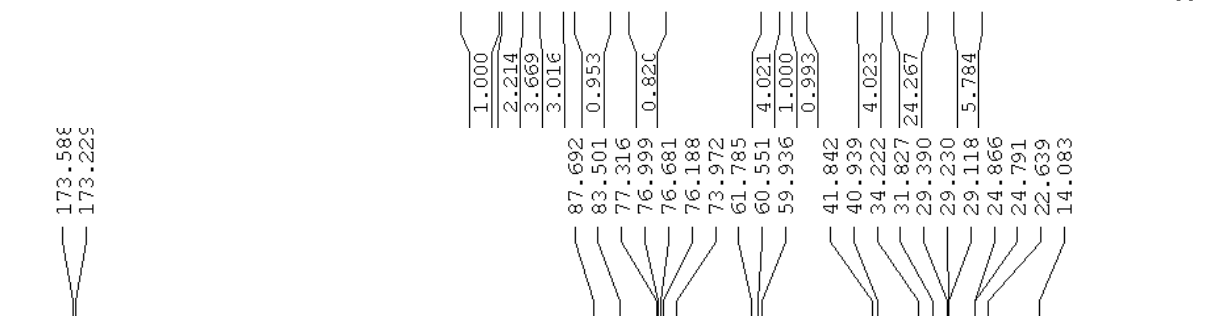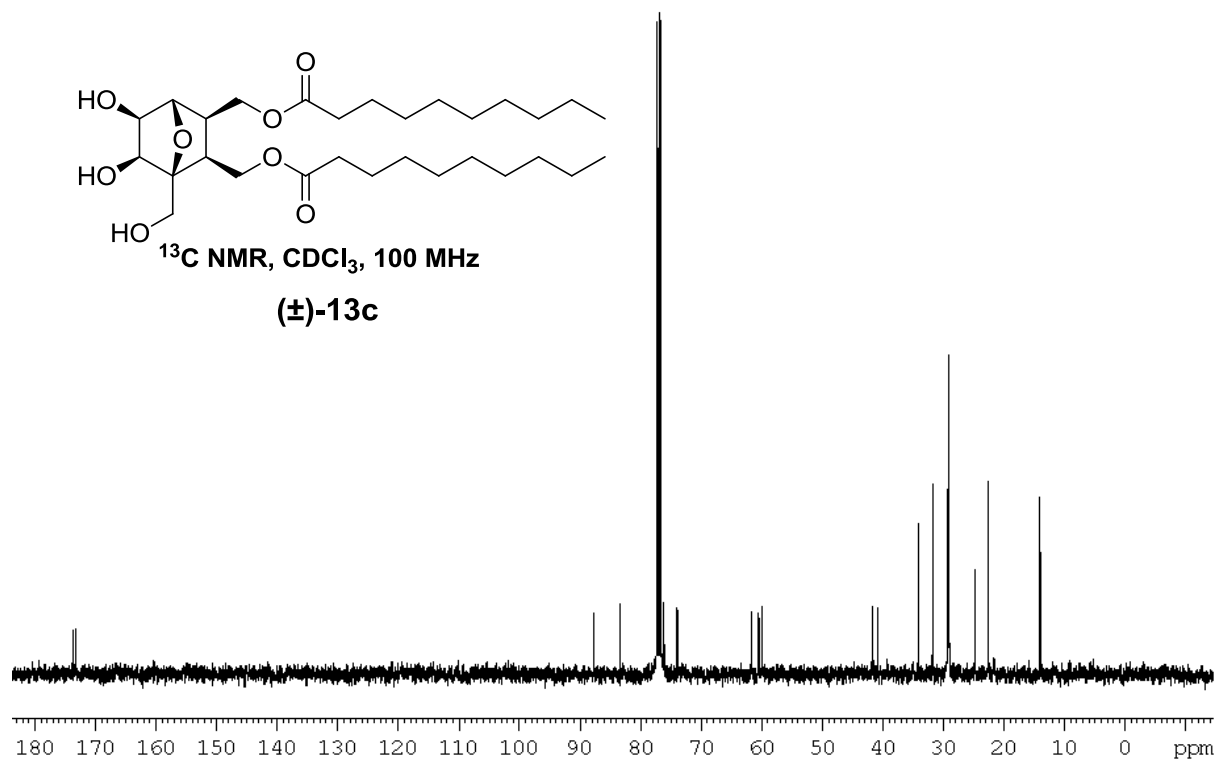

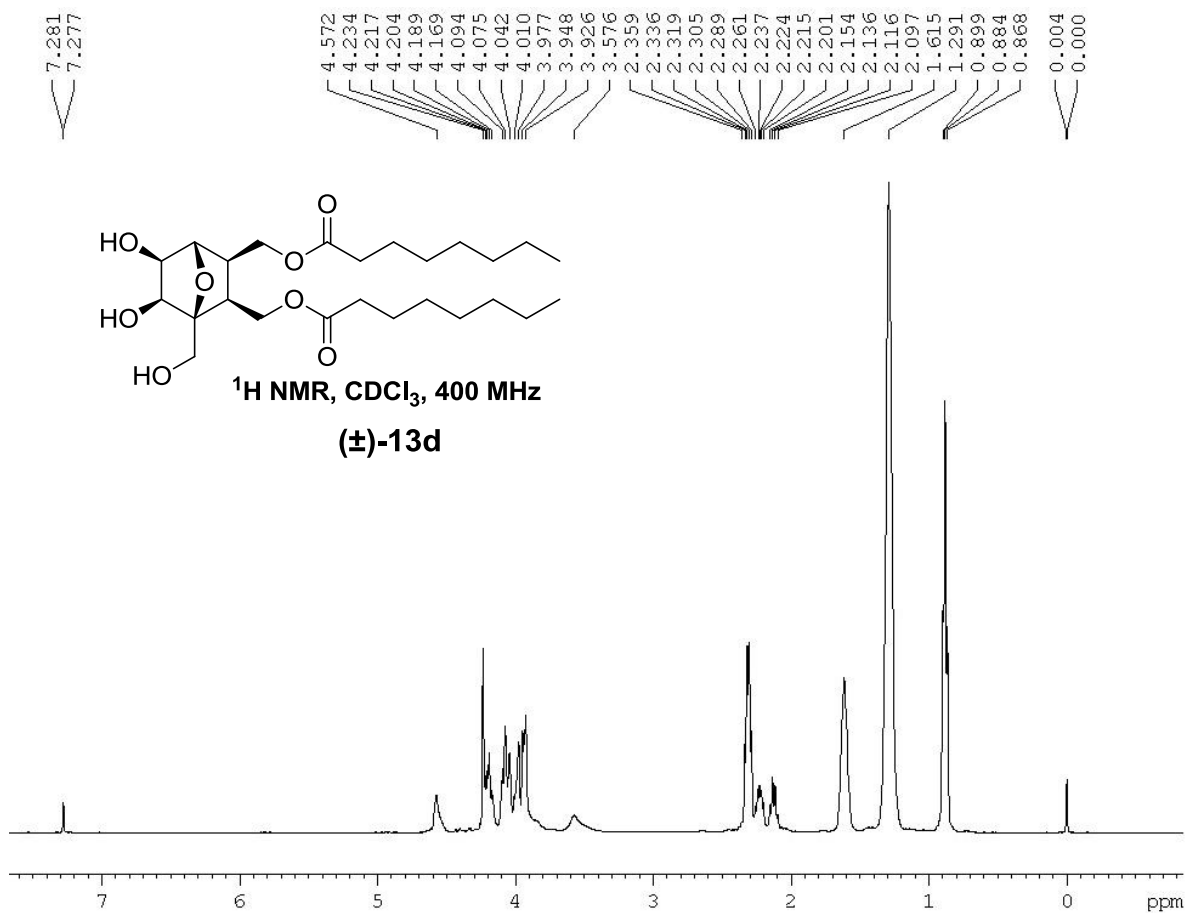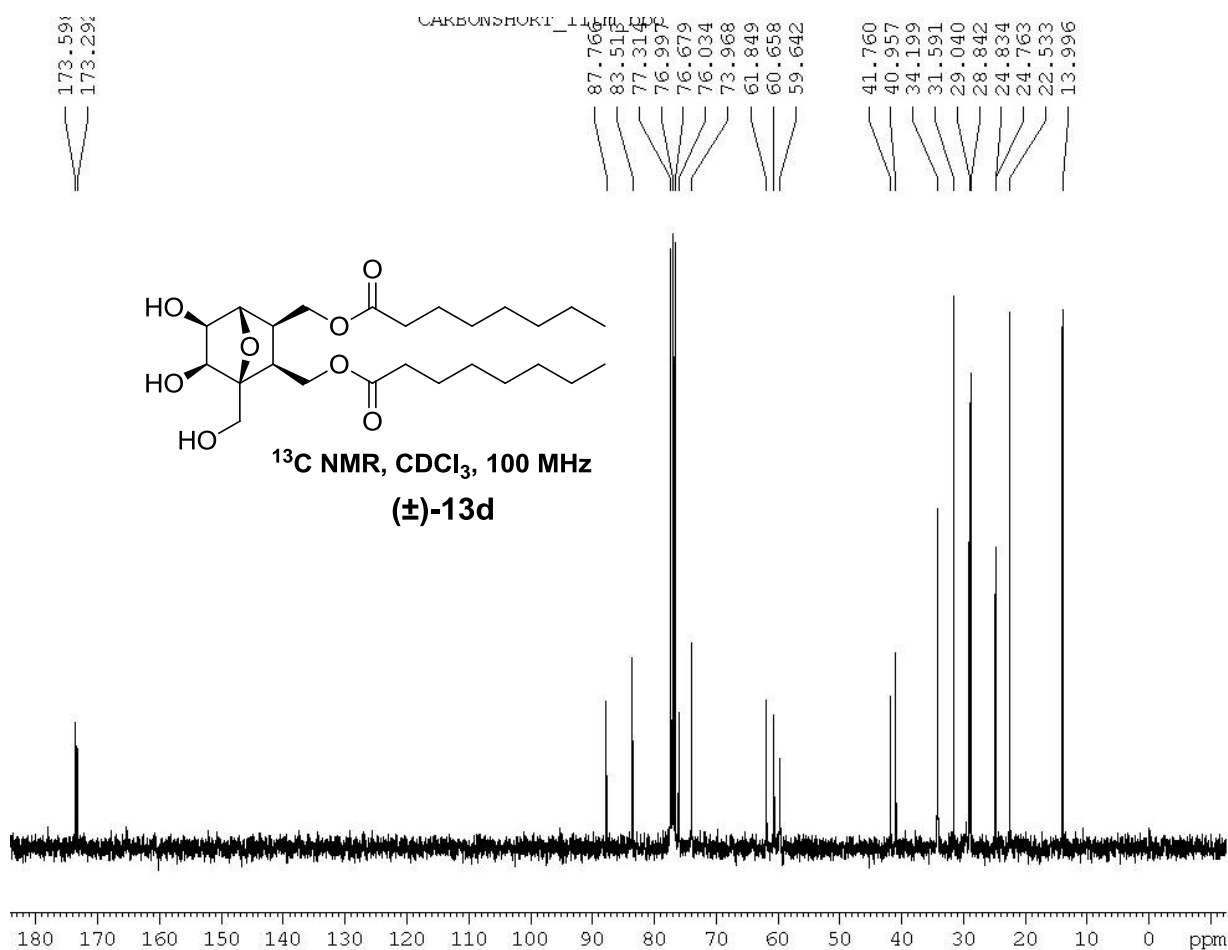

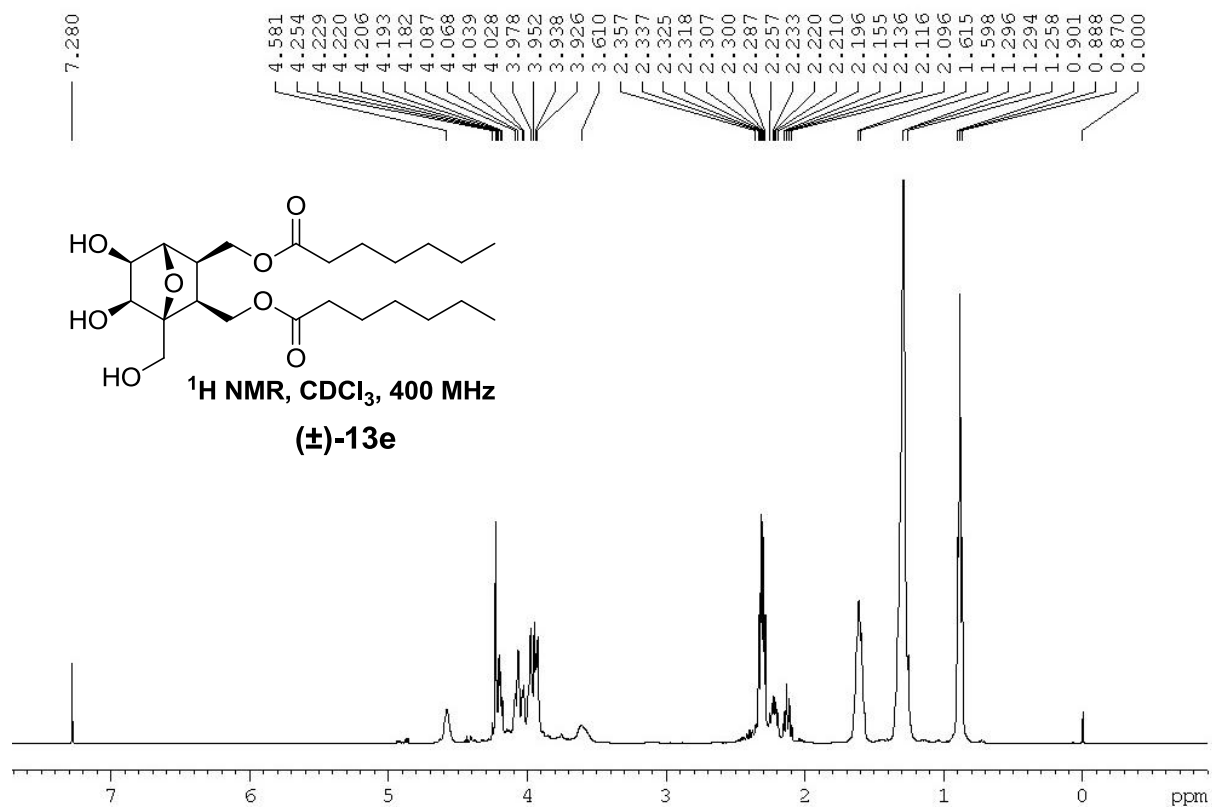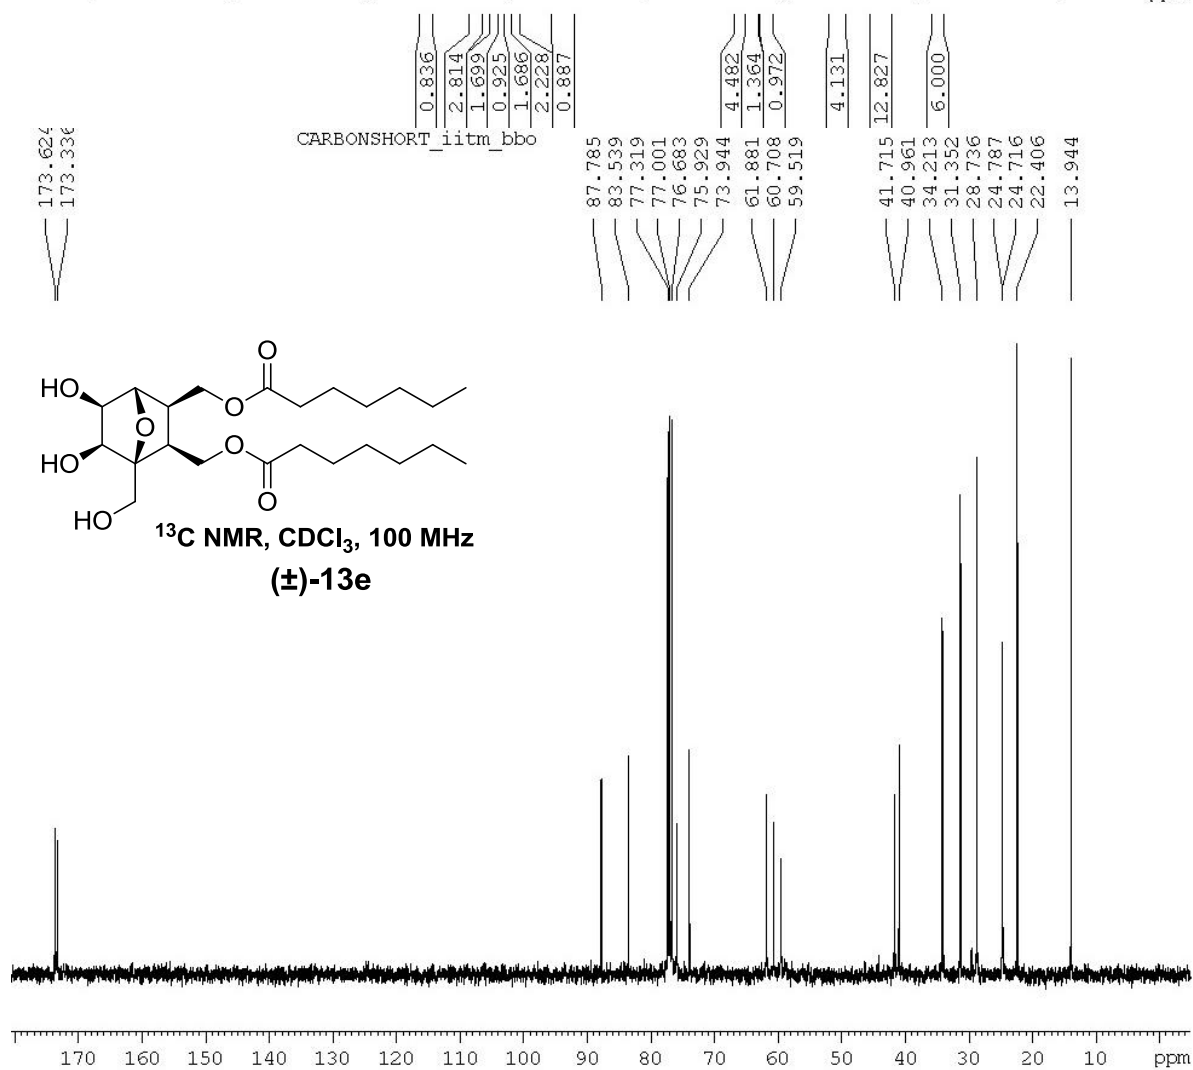

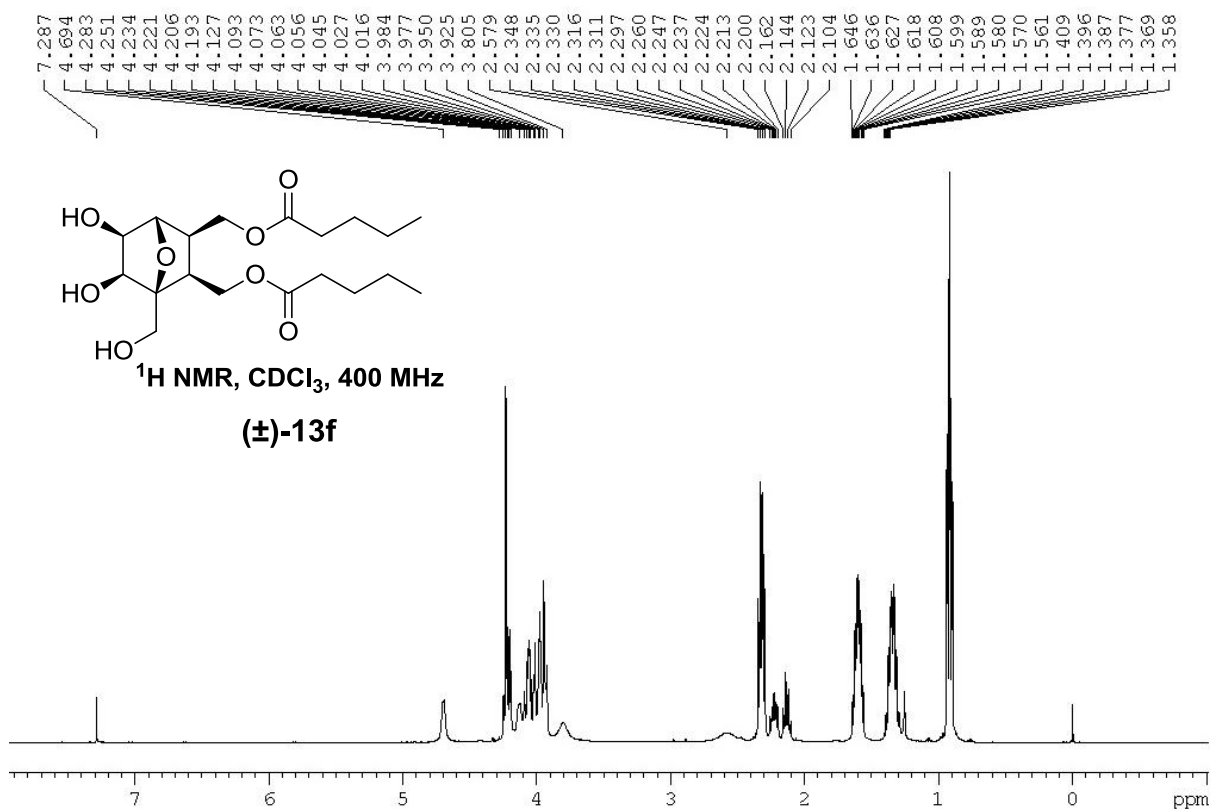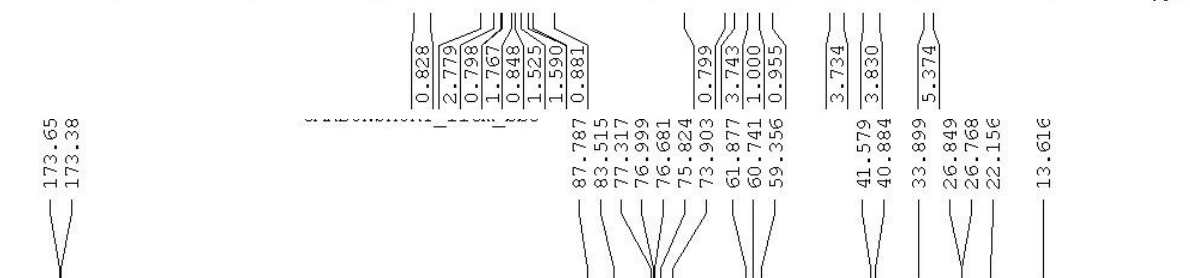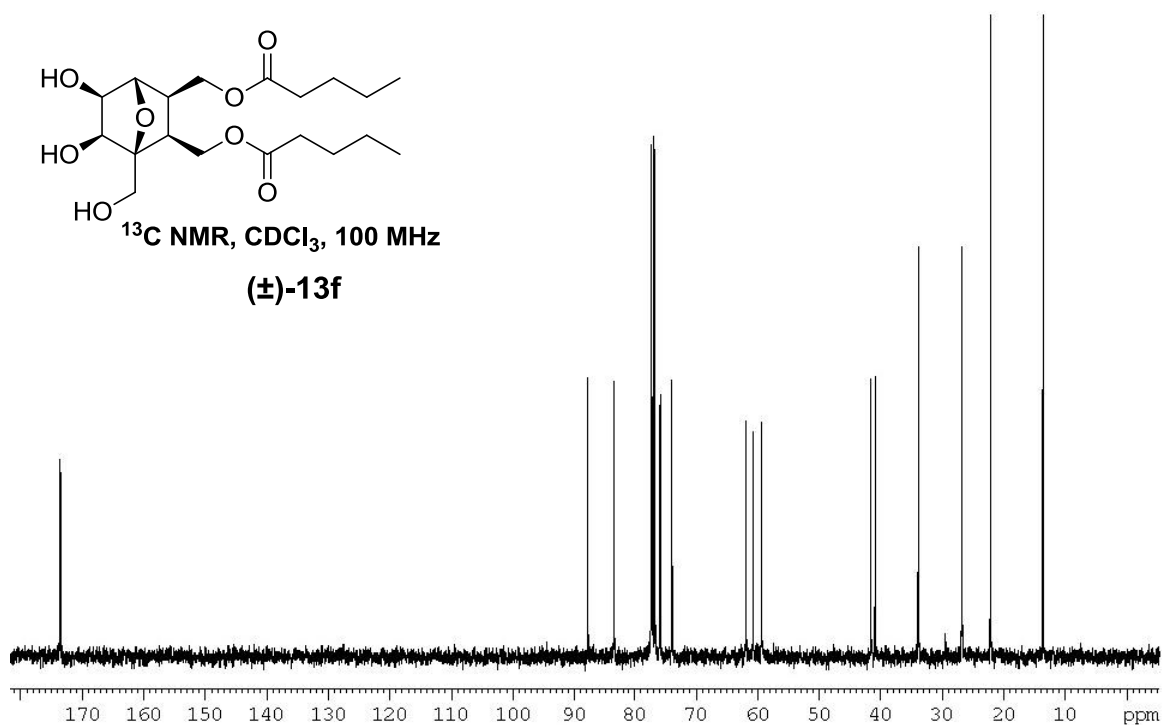

Supplement: c2ra01198k.pdf [file c2ra01198k.pdf]
